# Supplementary material for: Activin receptor-like kinase 1 is associated with immune cell infiltration and regulates CLEC14A transcription in cancer
Source: Angiogenesis. 2018 Aug 21;22(1):117–31. doi: 10.1007/s10456-018-9642-5 (PMC6510886; doi:10.1007/s10456-018-9642-5)
Supplement: Supplementary file 5 — Supplementary material 5 (XLSX 3980 KB) [file 10456_2018_9642_MOESM5_ESM.xlsx]

## Sheet: BLCA
Supplementary Table 5. Ranked lists of ACVRL1-associated genes in 14 tumor types (1 tumor type/tab)
Cells highlighted in yellow represent genes with a Pearson r ≥ 0,50.
Gene	Pearson coefficient
CD34	0.89
ENG	0.89
SH2D3C	0.88
CD93	0.88
TIE1	0.87
ECSCR	0.86
PECAM1	0.85
CXORF36	0.85
CLEC14A	0.85
IL3RA	0.84
RAMP3	0.84
CDH5	0.83
HLX	0.83
VWF	0.83
LDB2	0.83
ADGRL4	0.83
S1PR1	0.82
TEK	0.82
RHOJ	0.81
APLNR	0.8
EBF1	0.8
ADCY4	0.79
GJA4	0.79
GIMAP7	0.79
DYSF	0.79
SCARF1	0.79
ROBO4	0.79
BCL6B	0.79
COL4A1	0.78
GIMAP1	0.78
STARD8	0.78
SEMA6B	0.78
MYCT1	0.78
PCDH12	0.78
FAM167B	0.78
PLXND1	0.78
COL4A2	0.77
COL15A1	0.77
PLVAP	0.77
USHBP1	0.77
ADAMTS9	0.77
ESAM	0.77
JAM2	0.77
CLEC3B	0.76
KLF2	0.76
C1ORF54	0.76
TMEM255B	0.76
GIMAP4	0.76
FLT4	0.75
GRK5	0.75
PTGIR	0.75
CYYR1	0.75
MFNG	0.74
RASGRF2	0.74
GIMAP5	0.74
AQP1	0.73
GPR4	0.73
MEF2C	0.73
SH2B3	0.73
CALCRL	0.73
RAMP2	0.73
EMCN	0.73
ENTPD1	0.72
GYPC	0.72
MCAM	0.72
ELMO1	0.72
GIMAP6	0.72
SOX18	0.72
IFFO1	0.72
CETP	0.71
CLDN5	0.71
FCN3	0.71
FHL5	0.71
CCDC102B	0.71
FAM124B	0.71
PALD1	0.71
KANK3	0.71
ACE	0.7
GPIHBP1	0.7
EGFL7	0.7
ABI3	0.7
TNS2	0.7
HECW2	0.7
FMNL3	0.7
RFTN2	0.7
FLI1	0.69
LRRC32	0.69
IGFBP7	0.69
ZNF366	0.69
LAMA4	0.69
MYL4	0.69
PDE2A	0.69
VIM	0.69
ZEB2	0.69
PLEKHO2	0.69
LRRC70	0.69
EBF3	0.69
HEYL	0.69
GUCY1B3	0.68
TMEM204	0.68
GIMAP8	0.68
EXOC3L2	0.68
CNRIP1	0.68
GRASP	0.68
SOX17	0.68
A2M	0.67
ANXA6	0.67
GNG11	0.67
ADAMTS4	0.67
P2RY14	0.67
CCDC170	0.67
DLL4	0.67
ZEB1	0.66
TNFRSF4	0.66
PLEKHO1	0.66
SHANK3	0.66
EXOC3L1	0.66
SNRK	0.66
SHE	0.66
RGCC	0.66
F2R	0.65
ACKR1	0.65
KDR	0.65
PDGFRB	0.65
SEC14L1	0.65
CCM2L	0.65
LHFP	0.65
FAM198B	0.65
VASH1	0.65
RASGRP3	0.65
EDNRB	0.64
EVI2A	0.64
NR5A2	0.64
FYN	0.64
GGT5	0.64
HIC1	0.64
PDE1A	0.64
SLC6A1	0.64
OIT3	0.64
TM4SF18	0.64
GNG2	0.64
LGI2	0.64
TSPAN18	0.64
CHN1	0.63
DPYSL2	0.63
ITGA4	0.63
PDGFRA	0.63
PLCL1	0.63
RNASE6	0.63
C10ORF128	0.63
LZTS1	0.63
COL18A1	0.63
APOLD1	0.63
DHH	0.63
HSPA12B	0.63
GPBAR1	0.63
PIK3R5	0.63
LY96	0.63
ADGRA2	0.63
TMEM176B	0.63
KLF9	0.62
FCN1	0.62
FOXS1	0.62
KCNN3	0.62
MEOX1	0.62
NOVA2	0.62
CCL14	0.62
SELPLG	0.62
COL14A1	0.62
RGS5	0.62
PREX2	0.62
NRROS	0.62
PTPN5	0.62
JAML	0.62
SNED1	0.62
C1ORF162	0.62
TPSB2	0.62
CRHBP	0.61
PDE3A	0.61
TNFRSF1B	0.61
TPSAB1	0.61
WIPF1	0.61
GAB3	0.61
CERKL	0.61
TMEM176A	0.61
ARHGEF15	0.61
ARHGAP15	0.61
SEMA3G	0.61
HEG1	0.61
CD4	0.6
CD28	0.6
FOXF1	0.6
HSPG2	0.6
MYO1F	0.6
CXORF21	0.6
NID2	0.6
MPEG1	0.6
ARHGAP31	0.6
CC2D2B	0.6
C11ORF96	0.6
LOC653786	0.6
ASGR2	0.59
ETS1	0.59
EGFLAM	0.59
HSD11B1	0.59
MFGE8	0.59
NFATC1	0.59
SPI1	0.59
SSTR2	0.59
FBLN5	0.59
CELF2	0.59
CD300C	0.59
LYVE1	0.59
TMEM119	0.59
TNFAIP8L2	0.59
ATP8B4	0.59
RASGRP4	0.59
JAM3	0.59
CD248	0.59
STARD13	0.59
NLRC4	0.59
ABI3BP	0.59
LOXHD1	0.59
PIEZO2	0.59
COX7A1	0.58
CPA3	0.58
FLT1	0.58
IL10	0.58
IL10RA	0.58
KLRB1	0.58
LCP2	0.58
SAMD14	0.58
PDE4B	0.58
ST3GAL2	0.58
UTRN	0.58
HYAL2	0.58
DOCK11	0.58
ARID5A	0.58
MAPRE2	0.58
PKIG	0.58
SLCO2B1	0.58
FAM110D	0.58
STAC3	0.58
MFRP	0.58
KIAA1755	0.58
TM6SF1	0.58
OLFML1	0.58
DENND3	0.58
FAM78A	0.58
KCNK17	0.58
CEACAM21	0.58
CYTH4	0.58
VENTX	0.58
COL13A1	0.57
HSPB2	0.57
NPR1	0.57
RGS3	0.57
TYROBP	0.57
SPARCL1	0.57
TNFSF12	0.57
DOK2	0.57
LY86	0.57
FERMT2	0.57
RASL12	0.57
PRAM1	0.57
TWIST2	0.57
ATP8B2	0.57
ARSB	0.56
CCR1	0.56
CCR4	0.56
CR1	0.56
CSF1R	0.56
ECM2	0.56
GPR183	0.56
S1PR3	0.56
ERG	0.56
GGTA1P	0.56
GPR21	0.56
ITGA9	0.56
KCNJ8	0.56
LAIR1	0.56
MAP3K3	0.56
STK10	0.56
CLEC10A	0.56
FAT4	0.56
PDGFD	0.56
BATF3	0.56
CSGALNACT1	0.56
PPP1R16B	0.56
EBF2	0.56
ADORA2A	0.55
AIF1	0.55
CTSG	0.55
GPR34	0.55
NCKAP1L	0.55
ITGB2	0.55
MNDA	0.55
TIMP1	0.55
C9ORF139	0.55
PLPP3	0.55
SLC7A7	0.55
GRAP2	0.55
SPRY1	0.55
IQGAP2	0.55
C3ORF36	0.55
ANKRD44	0.55
PCDHGA12	0.55
RASAL3	0.55
FAM101B	0.55
VSTM4	0.54
ADRA2A	0.54
C5AR1	0.54
CD33	0.54
CDH6	0.54
CMKLR1	0.54
CRYBB1	0.54
HRC	0.54
KCNA3	0.54
LMO2	0.54
NOTCH4	0.54
SRGN	0.54
PTGER2	0.54
PTGER3	0.54
RAB3IL1	0.54
RNASE2	0.54
VCAM1	0.54
WAS	0.54
LAPTM5	0.54
RECK	0.54
GPR65	0.54
CHST1	0.54
HCST	0.54
CLEC4G	0.54
TMEM106A	0.54
GPR146	0.54
RAB3C	0.54
MS4A4A	0.54
BIN2	0.54
TMEM150B	0.54
STAB1	0.54
PRND	0.54
FAM20C	0.54
PREX1	0.54
SIGLEC7	0.54
PCDH17	0.54
LRRC25	0.54
MS4A6A	0.54
C3AR1	0.53
CD1D	0.53
CYBB	0.53
EDNRA	0.53
EVI2B	0.53
FGF7	0.53
FPR1	0.53
GEM	0.53
GNGT2	0.53
ITGA1	0.53
JAK3	0.53
PTPRG	0.53
SLA	0.53
TACR1	0.53
THBS1	0.53
THY1	0.53
NRP1	0.53
AP1S2	0.53
F2RL3	0.53
GPR55	0.53
S1PR2	0.53
CD163	0.53
GMFG	0.53
LILRB2	0.53
GRAP	0.53
LILRA2	0.53
ADAMTS5	0.53
AKAP2	0.53
C19ORF35	0.53
SVEP1	0.53
TNFSF12-TNFSF13	0.53
CYGB	0.53
HIGD1B	0.53
P2RY13	0.53
LOC100129034	0.53
ADGRF5	0.53
RCSD1	0.53
LCN6	0.53
SIGLEC9	0.53
ARHGAP30	0.53
GIPC3	0.53
PILRA	0.53
FBN1	0.52
FCER1G	0.52
GNAI2	0.52
HTR2A	0.52
IL7R	0.52
LGALS2	0.52
LTC4S	0.52
PIP4K2A	0.52
SCN1B	0.52
CXCL12	0.52
SELP	0.52
SLCO2A1	0.52
LST1	0.52
CYSLTR1	0.52
MAP1LC3C	0.52
ITIH5	0.52
ADAMTS10	0.52
NRIP2	0.52
NTNG2	0.52
MMRN1	0.52
TMEM26	0.52
ADAP2	0.52
FNBP1	0.52
PHLDB1	0.52
FBXL7	0.52
SYNE1	0.52
KCNE4	0.52
ST6GALNAC6	0.52
GPSM3	0.52
BDKRB2	0.51
BTK	0.51
CD53	0.51
FGF2	0.51
ITGAX	0.51
ABCB1	0.51
TSPAN4	0.51
LAT2	0.51
ARHGAP25	0.51
DLC1	0.51
EMILIN1	0.51
OR51E1	0.51
LINC00472	0.51
PIK3R6	0.51
TOX2	0.51
PALM2-AKAP2	0.51
SIRPB2	0.51
TPSD1	0.51
P2RY8	0.51
FGD2	0.51
ADAMTSL1	0.51
PARVG	0.51
ALOX5AP	0.5
CD40LG	0.5
MS4A2	0.5
GYPE	0.5
HDC	0.5
HLA-DPB1	0.5
ICAM2	0.5
ICAM3	0.5
IL6	0.5
ITGAL	0.5
TXLNB	0.5
MAP1A	0.5
NCF4	0.5
DDR2	0.5
PLCB2	0.5
PTPRC	0.5
TBXA2R	0.5
VAV1	0.5
GAS7	0.5
PSTPIP1	0.5
PAPSS2	0.5
ADAMTS1	0.5
CYTIP	0.5
FGL2	0.5
LILRA1	0.5
PTP4A3	0.5
CD300A	0.5
VSIG4	0.5
LILRA6	0.5
PEAK1	0.5
RIN3	0.5
DOK3	0.5
PEAR1	0.5
CD300E	0.5
C1QTNF1	0.5
CRISPLD2	0.5
SGIP1	0.5
UBASH3A	0.5
SLCO1C1	0.5
SNTG2	0.5
PCDH18	0.5
STK32B	0.5
PLAC9	0.5
LIMS2	0.5
DAAM2	0.5
HMHA1	0.5
MMD	0.5
CAMK1G	0.5
CD300LB	0.5
LHX6	0.5
TMEM88	0.5
TMEM233	0.5
MICAL1	0.5
NCF1C	0.5
ADRA1B	0.49
ACAN	0.49
C1QA	0.49
C1S	0.49
CD3E	0.49
CD14	0.49
FCGR1B	0.49
FGF10	0.49
FGR	0.49
HK3	0.49
CYR61	0.49
TCTEX1D1	0.49
MRC1	0.49
SEPT4	0.49
PTGFR	0.49
SLAMF1	0.49
SPARC	0.49
SPN	0.49
DCHS1	0.49
GDF3	0.49
ZBTB46	0.49
ABCC9	0.49
EBI3	0.49
RCAN2	0.49
LILRB5	0.49
FILIP1L	0.49
ANKRD55	0.49
AKNA	0.49
SNX9	0.49
UBE2J1	0.49
NHLRC4	0.49
UACA	0.49
RASA3	0.49
PCDHGA11	0.49
GPRIN3	0.49
PLXDC1	0.49
LILRA5	0.49
ZNF521	0.49
GIMAP2	0.49
GVINP1	0.49
CXORF65	0.49
REM1	0.49
LIX1L	0.49
ARHGAP9	0.49
RGS18	0.49
TNS3	0.49
C1QC	0.48
CD6	0.48
CTSK	0.48
DOCK2	0.48
TSC22D3	0.48
EPB41L2	0.48
FCGR2A	0.48
FOLR2	0.48
GUCY1A2	0.48
LYL1	0.48
PRRX1	0.48
PODXL	0.48
SRL	0.48
CCL23	0.48
SNAI1	0.48
TCF21	0.48
TNXB	0.48
CXCR4	0.48
DPF3	0.48
S1PR4	0.48
SOCS3	0.48
FCGR2C	0.48
ARHGEF17	0.48
DCANP1	0.48
CD302	0.48
PLXNC1	0.48
LHFPL2	0.48
PRSS23	0.48
IGFLR1	0.48
TXNDC15	0.48
LINC00924	0.48
SH3RF3	0.48
GLT8D2	0.48
RASSF4	0.48
TLR8	0.48
GHRL	0.48
COX4I2	0.48
FAM46C	0.48
MARCH1	0.48
KLHDC8A	0.48
TMEM100	0.48
ARRDC5	0.48
RNF130	0.48
DENND5A	0.48
FAM26E	0.48
MCOLN2	0.48
NKAPL	0.48
P2RY10	0.48
DMGDH	0.48
LMCD1	0.48
ZNF831	0.48
SAMSN1	0.48
ELFN1	0.48
ADORA3	0.47
FMNL1	0.47
CD2	0.47
CHI3L1	0.47
COL6A3	0.47
CTGF	0.47
ENPEP	0.47
FCGR3A	0.47
FMOD	0.47
HLA-DMB	0.47
IL6ST	0.47
IL16	0.47
ILK	0.47
ITK	0.47
POU6F1	0.47
PRKG1	0.47
MAPK11	0.47
GAPT	0.47
PTPRB	0.47
CCL21	0.47
TGFBR2	0.47
VIP	0.47
NRP2	0.47
ADAMTS14	0.47
TESPA1	0.47
IGSF6	0.47
IKZF1	0.47
OTOA	0.47
NLRP3	0.47
GLIPR2	0.47
MILR1	0.47
LAX1	0.47
ACSM5	0.47
DOCK10	0.47
RFTN1	0.47
MOXD1	0.47
SNX20	0.47
C4ORF50	0.47
ADCYAP1	0.46
NLRC3	0.46
MS4A3	0.46
TNFRSF8	0.46
TNFSF8	0.46
CFL2	0.46
CCR6	0.46
COL8A1	0.46
CREM	0.46
DPT	0.46
EMP3	0.46
FCGR1A	0.46
GATA6	0.46
IL12RB1	0.46
IRF4	0.46
ITGA5	0.46
LAMA2	0.46
MPP1	0.46
MSR1	0.46
NAIP	0.46
PDGFB	0.46
ABCB4	0.46
PIK3CG	0.46
TIFAB	0.46
RARRES2	0.46
RPS6KA2	0.46
SIGLEC1	0.46
TBXAS1	0.46
TCN2	0.46
BEST1	0.46
ZNF154	0.46
PLA2G7	0.46
ITGA10	0.46
CST7	0.46
CD84	0.46
TRPA1	0.46
GIT2	0.46
LAMC3	0.46
SPON2	0.46
LILRB3	0.46
CORO7	0.46
KIAA0226L	0.46
TMC8	0.46
FOXP3	0.46
EMILIN2	0.46
DACT1	0.46
GALNT15	0.46
TAGAP	0.46
NFAM1	0.46
PIK3AP1	0.46
LCN10	0.46
CLEC9A	0.46
TREM2	0.46
SASH3	0.46
CHSY1	0.46
SLC9A9	0.46
SLAMF8	0.46
SLC24A4	0.46
FCGR1C	0.46
CCDC69	0.46
LINC00961	0.46
SYNE3	0.46
NCF1	0.46
CD209	0.46
TMEM236	0.46
BMS1P20	0.46
C1QB	0.45
CD48	0.45
COL5A2	0.45
DPYS	0.45
F13A1	0.45
FCGR2B	0.45
FCGRT	0.45
FRZB	0.45
GLRX	0.45
HHEX	0.45
IL2RA	0.45
ITGA7	0.45
MMP2	0.45
MMP16	0.45
RGL4	0.45
NFATC2	0.45
PLEK	0.45
PRKCB	0.45
PTGDR	0.45
PTPN7	0.45
RGS1	0.45
RNASE1	0.45
SALL1	0.45
CCL16	0.45
ST6GAL1	0.45
SIPA1	0.45
FAM155A	0.45
ZAP70	0.45
ADAM12	0.45
MADCAM1	0.45
ITGA8	0.45
RAPGEF2	0.45
CCDC36	0.45
TSPAN11	0.45
ANKRD29	0.45
IL21R	0.45
FAM167A	0.45
HAVCR2	0.45
CPXM2	0.45
STAB2	0.45
CARD8	0.45
SYT11	0.45
ANGPTL2	0.45
CHST7	0.45
FAM13C	0.45
JAZF1	0.45
LATS2	0.45
GREM1	0.45
ADAMDEC1	0.45
POM121L9P	0.45
ALPL	0.44
BMX	0.44
CD86	0.44
CCR8	0.44
LPAR4	0.44
GZMK	0.44
FAM151B	0.44
LUM	0.44
MFAP4	0.44
PRG2	0.44
RELN	0.44
MIR100HG	0.44
TLN1	0.44
TRPC2	0.44
TRPC4	0.44
PXDN	0.44
SDPR	0.44
DGKI	0.44
SLC9A3R2	0.44
ADAMTS2	0.44
ACAP1	0.44
GPC6	0.44
RASGRP2	0.44
CLEC4D	0.44
TMEM173	0.44
LINC00341	0.44
LOC606724	0.44
ALPK2	0.44
GCSAML	0.44
MRGPRF	0.44
HVCN1	0.44
ANTXR2	0.44
CYTL1	0.44
LRRK2	0.44
ZCCHC24	0.44
SEPT6	0.44
RGL1	0.44
SULF1	0.44
ADPRM	0.44
CASS4	0.44
PAPLN	0.44
WDFY4	0.44
CHRDL2	0.44
SLC35F1	0.44
NEXN	0.44
MYADM	0.44
IL17B	0.44
HPGDS	0.44
SCHIP1	0.44
EFEMP2	0.44
ARL5C	0.44
BIN1	0.43
TRAK2	0.43
CALD1	0.43
CD3G	0.43
CEACAM4	0.43
COL6A2	0.43
CSF1	0.43
DCN	0.43
EPHA3	0.43
FLT3	0.43
FUT7	0.43
HLA-DPA1	0.43
HLA-DRA	0.43
IRF8	0.43
JCHAIN	0.43
KCNA5	0.43
LCP1	0.43
LOXL2	0.43
LY9	0.43
SH2D1A	0.43
MEF2D	0.43
MGP	0.43
PIK3CD	0.43
PTGDS	0.43
SNAI3	0.43
CCL11	0.43
TGFB1I1	0.43
C1ORF140	0.43
PTCRA	0.43
KCNAB2	0.43
CADPS	0.43
SELM	0.43
MRC2	0.43
GLIPR1	0.43
ADAMTS8	0.43
FSTL1	0.43
TRAF3IP3	0.43
TMEM150C	0.43
AZIN2	0.43
DCSTAMP	0.43
TXNDC5	0.43
SLAMF6	0.43
SSUH2	0.43
KLHL5	0.43
MZB1	0.43
DIXDC1	0.43
DNAJC5B	0.43
SLC25A45	0.43
CCDC50	0.43
P4HA3	0.43
FAM20A	0.43
SOBP	0.43
EVA1B	0.43
LXN	0.43
KIAA1462	0.43
TSHZ3	0.43
GPR141	0.43
PAMR1	0.43
COL23A1	0.43
GBGT1	0.43
FILIP1	0.43
SCIMP	0.43
CACNA2D4	0.43
GPR171	0.43
MYO1G	0.43
P2RY12	0.43
ACP5	0.42
ABCD2	0.42
ANGPT2	0.42
AOAH	0.42
APBB2	0.42
RHOG	0.42
ATP2A3	0.42
LDLRAD4	0.42
CCR5	0.42
FGF13	0.42
GFRA2	0.42
GPR17	0.42
RAPGEF1	0.42
GUCY1A3	0.42
LAMB1	0.42
LCK	0.42
LSAMP	0.42
CD180	0.42
MMP9	0.42
GADD45B	0.42
SERPINF1	0.42
PPP3CC	0.42
RTN1	0.42
CCL2	0.42
SLC2A5	0.42
SLC8A3	0.42
STAT4	0.42
TLR1	0.42
TMOD1	0.42
TRAF1	0.42
ZBTB16	0.42
ACOX2	0.42
THEMIS2	0.42
MROH8	0.42
FAM65B	0.42
RUSC2	0.42
TRANK1	0.42
IL18BP	0.42
MYL9	0.42
IFI30	0.42
RNF122	0.42
DENND1C	0.42
BICC1	0.42
ORAI2	0.42
SPATC1	0.42
CD300LF	0.42
SPRY4	0.42
RNF166	0.42
CLEC4A	0.42
MRO	0.42
CECR1	0.42
MEDAG	0.42
TRAPPC3L	0.42
CPXM1	0.42
FAM124A	0.42
LILRA4	0.42
MAP3K7CL	0.42
MSRB3	0.42
KLHL33	0.42
VAT1L	0.42
IGDCC4	0.42
OLFML2B	0.42
TMEM158	0.42
PDLIM3	0.42
ARHGAP18	0.42
C10ORF54	0.42
ACTA2	0.41
ADPRH	0.41
ANXA5	0.41
AOX1	0.41
ARRB2	0.41
FXYD2	0.41
AZU1	0.41
RUNX3	0.41
CBLN1	0.41
CD37	0.41
PPM1M	0.41
CMA1	0.41
DCLK2	0.41
CXCR3	0.41
GRIK3	0.41
ICAM1	0.41
IL5RA	0.41
ITIH3	0.41
MAG	0.41
MYO9B	0.41
NINJ1	0.41
ROR1	0.41
SNAP25	0.41
TGFB3	0.41
TPM2	0.41
SCG2	0.41
MYH13	0.41
MSC	0.41
STK17B	0.41
RAMP1	0.41
CRTAP	0.41
POSTN	0.41
CD226	0.41
TNFSF13B	0.41
RAI2	0.41
PIM2	0.41
TBC1D10C	0.41
PRCD	0.41
HAPLN3	0.41
MS4A6E	0.41
CARD16	0.41
COL5A3	0.41
TRAT1	0.41
LINC00426	0.41
MS4A14	0.41
PHYKPL	0.41
SYDE1	0.41
RBPMS2	0.41
GPR84	0.41
CCDC141	0.41
HAAO	0.41
BHMT2	0.41
TCEAL7	0.41
SIGLEC10	0.41
ATP10A	0.41
UNC5A	0.41
KIF17	0.41
RSPH9	0.41
FAM110B	0.41
CPNE5	0.41
FAM160B1	0.41
KANK2	0.41
CLEC4E	0.41
CLECL1	0.41
NCR3	0.41
POPDC2	0.41
CRLF2	0.41
ADGRE4P	0.41
ADRA1D	0.4
AEBP1	0.4
RHOH	0.4
BCL2A1	0.4
BGN	0.4
C1R	0.4
CACNA1C	0.4
SERPINH1	0.4
CD27	0.4
CD74	0.4
CD52	0.4
CLIC2	0.4
VCAN	0.4
CTSO	0.4
CTSS	0.4
CTSZ	0.4
SEPT1	0.4
F10	0.4
FES	0.4
FHL1	0.4
HLA-DQA1	0.4
HPCAL1	0.4
IGF1	0.4
ITGB3	0.4
ITGB7	0.4
KCNMA1	0.4
MAP1B	0.4
CD200	0.4
MTTP	0.4
NTRK3	0.4
TIGIT	0.4
RAB27A	0.4
SCN3A	0.4
CCL19	0.4
FAM170B	0.4
ADAMTS16	0.4
TIMP2	0.4
CUBN	0.4
CNTNAP1	0.4
PLA2G4C	0.4
VNN2	0.4
ARHGEF6	0.4
DOCK4	0.4
SIRPA	0.4
NEK6	0.4
INMT	0.4
ZC3H12D	0.4
PRKCDBP	0.4
MIR155HG	0.4
PI15	0.4
LRRC8C	0.4
KIRREL3	0.4
FNDC1	0.4
CD163L1	0.4
SGTB	0.4
PPP2R3C	0.4
OLFML3	0.4
TAC4	0.4
SLC39A13	0.4
BMP8A	0.4
LOC100130872	0.4
HSF5	0.4
LAT	0.4
RAB30	0.4
AFAP1	0.4
NEGR1	0.4
LINC00189	0.4
AP2A2	0.39
ANK2	0.39
CD5	0.39
CD38	0.39
CDH11	0.39
COL3A1	0.39
COL6A1	0.39
CREBL2	0.39
CYP27A1	0.39
ELN	0.39
EML1	0.39
FAP	0.39
GNG7	0.39
KCNK3	0.39
LTA	0.39
MAN2B1	0.39
NID1	0.39
PDE3B	0.39
PPEF1	0.39
PRELP	0.39
MASP1	0.39
RCVRN	0.39
SLC18A2	0.39
TLR4	0.39
TNFAIP6	0.39
C15ORF53	0.39
FLJ45079	0.39
WNT2	0.39
METTL24	0.39
ADAM6	0.39
FCMR	0.39
ITM2A	0.39
KIAA0125	0.39
MRVI1	0.39
LILRB4	0.39
CORO1A	0.39
FAM107A	0.39
MAP4K1	0.39
PVRIG	0.39
LRRC2	0.39
CYBRD1	0.39
SIGLEC11	0.39
VASN	0.39
ARHGAP24	0.39
FERMT3	0.39
ROPN1L	0.39
SIDT2	0.39
LINC-PINT	0.39
TLR7	0.39
ASB2	0.39
C22ORF15	0.39
BNC2	0.39
TMEM140	0.39
DRAM1	0.39
TMEM200C	0.39
HABP4	0.39
SAMD3	0.39
LRCH1	0.39
PIP5K1C	0.39
CMTM3	0.39
MS4A7	0.39
MYRIP	0.39
BOC	0.39
SBSPON	0.39
DKK3	0.39
ICOS	0.39
SPRED1	0.39
BRE-AS1	0.39
NCF1B	0.39
CDK15	0.39
AMPD1	0.38
ARHGAP4	0.38
ATM	0.38
FAM43A	0.38
DUSP1	0.38
XIRP1	0.38
FFAR3	0.38
HGF	0.38
IGFBP4	0.38
NCAM1	0.38
NNMT	0.38
POU2F2	0.38
RGS2	0.38
SGCD	0.38
SH3BGRL	0.38
SSTR3	0.38
TAGLN	0.38
TNS1	0.38
FAM177B	0.38
SLC16A6	0.38
GLP2R	0.38
ST3GAL6	0.38
SPON1	0.38
OLFM1	0.38
IFITM2	0.38
AKAP13	0.38
NHSL2	0.38
TMEM156	0.38
PRSS36	0.38
LEF1	0.38
MARCH2	0.38
PRR16	0.38
GTSF1L	0.38
TRPV2	0.38
EVL	0.38
ENTHD1	0.38
SOWAHD	0.38
BTLA	0.38
WBP1L	0.38
PALLD	0.38
PLCL2	0.38
COTL1	0.38
ISCU	0.38
HEY2	0.38
FAM162B	0.38
GRAMD1A	0.38
THSD7A	0.38
TICAM2	0.38
PKDCC	0.38
NXPE3	0.38
LINC01119	0.38
NAPSB	0.38
SCML4	0.38
DENND2A	0.38
PRUNE2	0.38
OSCAR	0.38
OSTM1	0.38
PHOSPHO1	0.38
CACNB2	0.37
CCIN	0.37
CD72	0.37
COL1A2	0.37
COMP	0.37
CSF2RA	0.37
CYP19A1	0.37
GPX8	0.37
GRIA4	0.37
HCK	0.37
HLA-DRB1	0.37
IL2RB	0.37
KCNQ3	0.37
AFF3	0.37
LTB	0.37
ZNF467	0.37
PCSK1	0.37
PDCD1	0.37
PRCP	0.37
PKN1	0.37
PRKD1	0.37
PTPRCAP	0.37
CCL13	0.37
ST8SIA1	0.37
SLC11A1	0.37
S100Z	0.37
ZNF80	0.37
STX11	0.37
TSPAN32	0.37
NMUR1	0.37
CORO2B	0.37
NES	0.37
IRAK3	0.37
LACC1	0.37
ZNF671	0.37
DOCK8	0.37
ADAMTS12	0.37
TMEM200A	0.37
FCRL5	0.37
KCTD10	0.37
C3ORF20	0.37
SLA2	0.37
CCL15-CCL14	0.37
FXYD6	0.37
EPDR1	0.37
FAIM2	0.37
CCDC152	0.37
SLC39A14	0.37
KLHL6	0.37
PI16	0.37
SFMBT2	0.37
LRRTM2	0.37
LINC01558	0.37
OR10J1	0.37
PCED1B-AS1	0.37
SIT1	0.37
MOB3A	0.37
HSPB6	0.37
PODN	0.37
GPR132	0.37
TBX21	0.37
CLSTN2	0.37
SMOC2	0.37
PDLIM2	0.37
RAB37	0.37
CRTC3	0.37
ABL1	0.36
ACR	0.36
APOC2	0.36
ARHGDIB	0.36
ATP1B2	0.36
C2	0.36
CD3D	0.36
COL1A1	0.36
CRHR2	0.36
PARP15	0.36
LPAR1	0.36
CELA1	0.36
ELANE	0.36
FKBP5	0.36
INSR	0.36
KCNMB1	0.36
LGALS1	0.36
MMP19	0.36
MYLK	0.36
NFKBIE	0.36
PLA2G5	0.36
PTPRJ	0.36
RBMS2	0.36
SFRP4	0.36
SLIT3	0.36
SOX10	0.36
SPOCK1	0.36
STAT5A	0.36
ZCCHC5	0.36
TCF4	0.36
TDO2	0.36
TPM1	0.36
TNFSF4	0.36
VTN	0.36
FAM74A1	0.36
PICALM	0.36
CAMK1	0.36
KMO	0.36
AOC3	0.36
MPDZ	0.36
ITGBL1	0.36
LPXN	0.36
CREB5	0.36
TRAM2	0.36
HEPH	0.36
KBTBD11	0.36
NAALADL1	0.36
RASGRP1	0.36
SORBS3	0.36
CXCR6	0.36
SDS	0.36
SP140	0.36
FAM92B	0.36
GLT1D1	0.36
SNX22	0.36
FAM26F	0.36
DACT3	0.36
NOSTRIN	0.36
FAM129A	0.36
MAS1L	0.36
CALHM2	0.36
PYHIN1	0.36
CHST15	0.36
PRRX2	0.36
RSPO3	0.36
ITPRIP	0.36
FAM195B	0.36
PDCD4-AS1	0.36
SLC46A3	0.36
PRR34	0.36
MRAS	0.36
FLVCR2	0.36
DOK5	0.36
TBC1D1	0.36
UNQ6494	0.36
MKL1	0.36
TMEM217	0.36
TPSG1	0.36
RGS22	0.36
IL21	0.36
TIMD4	0.36
GNB4	0.36
CHIA	0.36
CLEC6A	0.36
OR2B11	0.36
LINC00312	0.36
AGT	0.35
UBL4B	0.35
ATOX1	0.35
TNFRSF17	0.35
C4A	0.35
CLC	0.35
COL4A3	0.35
COL4A4	0.35
COL5A1	0.35
COL19A1	0.35
CTSL	0.35
CYP7A1	0.35
DNTT	0.35
DOCK1	0.35
STX2	0.35
ACSL4	0.35
FCN2	0.35
FGF14	0.35
GABRA2	0.35
LIF	0.35
LRP1	0.35
MPO	0.35
CEP112	0.35
NCF2	0.35
NDN	0.35
PDE6G	0.35
PLN	0.35
RGS10	0.35
SEPP1	0.35
SGCB	0.35
SLC18A1	0.35
STAT5B	0.35
TBX5	0.35
C15ORF54	0.35
NLRP6	0.35
UTF1	0.35
PPFIA2	0.35
DIRAS3	0.35
PDLIM7	0.35
MMP20	0.35
ENAM	0.35
SEMA3A	0.35
RAPGEF4	0.35
ADAMTS6	0.35
SYNPO	0.35
LINC01140	0.35
TRPM8	0.35
GLB1L	0.35
ZNF385D	0.35
MROH9	0.35
C16ORF89	0.35
CD300LG	0.35
CSMD2	0.35
ELFN2	0.35
ZNF469	0.35
GPR174	0.35
GLIS2	0.35
RAB24	0.35
EWSAT1	0.35
JAKMIP1	0.35
PIK3CD-AS1	0.35
DPPA4	0.35
HEMGN	0.35
PDZRN3	0.35
EPB41L3	0.35
TNFRSF13B	0.35
ADGRG5	0.35
PNMAL2	0.35
FAM196B	0.35
DERL3	0.35
IPCEF1	0.35
PLA2G2D	0.35
ZBTB32	0.35
ARRDC2	0.35
TTC16	0.35
AAED1	0.35
ABL2	0.34
ACP2	0.34
ANGPT1	0.34
APOC4	0.34
CXCR5	0.34
BMP6	0.34
CASP5	0.34
CD80	0.34
DAZL	0.34
F2RL2	0.34
FGF1	0.34
GABRD	0.34
GPR18	0.34
GRPR	0.34
HLA-DMA	0.34
HPD	0.34
ACOT12	0.34
RBPJ	0.34
IGLL1	0.34
IL12A	0.34
ITPKB	0.34
JUND	0.34
KCNS2	0.34
MATK	0.34
P2RX1	0.34
PDE1B	0.34
PLCG2	0.34
PMP22	0.34
PTGIS	0.34
RARA	0.34
CCL1	0.34
SGCA	0.34
SLC5A4	0.34
STC1	0.34
TAC1	0.34
TPO	0.34
YWHAH	0.34
ZYX	0.34
EOMES	0.34
FZD4	0.34
LDLRAD2	0.34
KALRN	0.34
ARHGEF2	0.34
RAB33A	0.34
AKAP6	0.34
VAMP5	0.34
GPR182	0.34
ARMC9	0.34
SEL1L2	0.34
FAM49A	0.34
PSMG3-AS1	0.34
SORCS1	0.34
FCRL1	0.34
FCRL3	0.34
CTHRC1	0.34
GRIN3A	0.34
AMDHD2	0.34
PLA1A	0.34
ANTXR1	0.34
RERG	0.34
KIAA1644	0.34
SLC22A16	0.34
FAM196A	0.34
SHISA3	0.34
LINC00926	0.34
PTRF	0.34
PXK	0.34
KIRREL	0.34
TFEC	0.34
ZHX2	0.34
ARHGEF40	0.34
NECAP2	0.34
IL26	0.34
TREML4	0.34
SCARA5	0.34
SMCO4	0.34
PLD4	0.34
ARHGAP20	0.34
RBM24	0.34
DNASE2B	0.34
WWTR1	0.34
PCOLCE2	0.34
DSEL	0.34
RND1	0.34
CLEC17A	0.34
OPN4	0.34
CLEC2D	0.34
OCSTAMP	0.34
RRN3P2	0.34
RILPL2	0.34
ACTG2	0.33
AMBP	0.33
AQP8	0.33
C11ORF95	0.33
CD247	0.33
CHIT1	0.33
CSRP1	0.33
DAPK3	0.33
FN1	0.33
FPR3	0.33
GNG10	0.33
GP5	0.33
HLA-DQB1	0.33
NR4A1	0.33
IGFBP5	0.33
IL4	0.33
SMAD7	0.33
DHRS7C	0.33
MYH8	0.33
NGFR	0.33
PER1	0.33
PYGM	0.33
RAP1A	0.33
RNASE3	0.33
SLC1A2	0.33
SOD3	0.33
PPP1R18	0.33
TFEB	0.33
FAM182B	0.33
CILP	0.33
OR2T2	0.33
CACNA1H	0.33
HAND2	0.33
AKAP12	0.33
GPRASP1	0.33
CEP170	0.33
CXCL13	0.33
MAB21L2	0.33
CPLX2	0.33
RBPMS	0.33
SYNDIG1	0.33
LOC440461	0.33
RELL1	0.33
COLEC12	0.33
SLC2A13	0.33
TLR10	0.33
KCTD12	0.33
ARL11	0.33
FAM163A	0.33
CCDC3	0.33
IMPG2	0.33
NCALD	0.33
PWAR4	0.33
C10ORF131	0.33
RASSF3	0.33
BET1P1	0.33
CNTN4	0.33
LINC00158	0.33
SH3TC1	0.33
RNF216	0.33
SIGLEC17P	0.33
VN1R5	0.33
PARVA	0.33
SAMD4A	0.33
PDGFC	0.33
C2ORF83	0.33
HAMP	0.33
HMHB1	0.33
TIAM2	0.33
C19ORF38	0.33
THEMIS	0.33
BACH2	0.33
TMEM220	0.33
C11ORF21	0.33
ALDH1L2	0.33
DENND5B	0.33
SNORA41	0.33
MYLPF	0.33
ERICH4	0.33
DPEP3	0.33
FNDC4	0.33
ADORA1	0.32
ARHGAP1	0.32
LRRC15	0.32
BLK	0.32
CD68	0.32
ADGRE5	0.32
CNN1	0.32
CNR2	0.32
COL12A1	0.32
CRMP1	0.32
CSF3	0.32
CTLA4	0.32
CYP21A2	0.32
DPYSL3	0.32
ECE1	0.32
EGR3	0.32
ADGRE1	0.32
GRB2	0.32
GRM1	0.32
GRM2	0.32
HLA-DRB6	0.32
HPS1	0.32
TNFRSF9	0.32
KCNA2	0.32
KCNJ9	0.32
KIFC3	0.32
LOX	0.32
NEFL	0.32
NFKB2	0.32
NOS3	0.32
NPY2R	0.32
OPCML	0.32
P2RX7	0.32
PSAP	0.32
RAC2	0.32
CCL3	0.32
CCL4	0.32
SMPD1	0.32
SPTA1	0.32
THBS2	0.32
TNFAIP3	0.32
SYNPO2	0.32
TSHR	0.32
SPANXA2	0.32
ST8SIA4	0.32
NR4A3	0.32
SHOC2	0.32
SLC14A2	0.32
NR0B2	0.32
DGKD	0.32
PTCH2	0.32
MAP3K14	0.32
CCPG1	0.32
TOX	0.32
RASSF2	0.32
GJC1	0.32
ARL4C	0.32
KRTAP20-2	0.32
SIRPB1	0.32
NOD1	0.32
ACAA2	0.32
RFPL1S	0.32
FAM114A2	0.32
BVES	0.32
KLHL38	0.32
RSPO2	0.32
FAM216B	0.32
FCRL2	0.32
FAM65A	0.32
RNASEK	0.32
CPEB4	0.32
SLFN14	0.32
FNDC9	0.32
OR2W3	0.32
LOC441601	0.32
LBH	0.32
RBP7	0.32
NTM	0.32
COPZ2	0.32
SLC41A2	0.32
LOXL4	0.32
RAB23	0.32
ARL15	0.32
GAGE13	0.32
TMEM55A	0.32
ITLN1	0.32
RTP5	0.32
ANKRD36BP2	0.32
SIK2	0.32
LMOD3	0.32
CRTAM	0.32
DOK6	0.32
LRRN4CL	0.32
JDP2	0.32
ALPK3	0.32
WFDC1	0.32
LMOD1	0.32
CLIP3	0.32
TCTN3	0.32
GAGE8	0.32
BBIP1	0.32
CSDC2	0.32
PKHD1L1	0.32
LINC00671	0.32
LINC01366	0.32
TTYH2	0.32
SYTL3	0.32
OR2M3	0.32
OR10X1	0.32
OR2L8	0.32
SOX8	0.32
PLEKHG2	0.32
TTC24	0.31
ATP6V1B2	0.31
SERPING1	0.31
C6	0.31
C7	0.31
CAMK2A	0.31
RUNX1T1	0.31
CD63	0.31
CD79A	0.31
RCBTB2	0.31
CYB5R3	0.31
DIO3	0.31
EGR2	0.31
FHL3	0.31
FLNA	0.31
FMO1	0.31
GAS1	0.31
GLI1	0.31
GPR15	0.31
GPR26	0.31
GZMH	0.31
HLA-DOB	0.31
FAM129C	0.31
HPR	0.31
IL1R1	0.31
IL2RG	0.31
INPP5D	0.31
ITGAV	0.31
MYH9	0.31
NAGLU	0.31
ROR2	0.31
OGG1	0.31
PAX5	0.31
PDK4	0.31
PFN1	0.31
DNAJC18	0.31
HTRA1	0.31
SFRP2	0.31
TFPI	0.31
TPM4	0.31
TWIST1	0.31
GDF5	0.31
HSD52	0.31
TNFSF13	0.31
CH25H	0.31
IL27RA	0.31
BAG2	0.31
CBLN4	0.31
FAM65C	0.31
GAB2	0.31
PAN2	0.31
MBNL2	0.31
CD96	0.31
SORBS1	0.31
SH2B2	0.31
SCRG1	0.31
A1BG-AS1	0.31
HHIPL2	0.31
JADE1	0.31
PDCD1LG2	0.31
LIMD2	0.31
C1QTNF4	0.31
ATP6V0D2	0.31
C1QTNF7	0.31
OSTN	0.31
IL22	0.31
SLC15A3	0.31
HMP19	0.31
SLC16A10	0.31
ZNF44	0.31
CCDC54	0.31
LINC01465	0.31
CPVL	0.31
RNF125	0.31
LAMB4	0.31
ZFPM2	0.31
SH3PXD2B	0.31
PLSCR4	0.31
LOC221122	0.31
TDRD6	0.31
SLAMF7	0.31
STAP1	0.31
TDRP	0.31
CYFIP2	0.31
FIBIN	0.31
ZBTB47	0.31
MYOCD	0.31
KLF17	0.31
OCM	0.31
CSRNP1	0.31
SPANXC	0.31
ACTB	0.3
ADCYAP1R1	0.3
APBB1	0.3
RHOB	0.3
BMPR2	0.3
SLC25A20	0.3
CCND3	0.3
MS4A1	0.3
CD22	0.3
CD79B	0.3
CHRNE	0.3
TPP1	0.3
CSF2RB	0.3
DMD	0.3
STOM	0.3
EID3	0.3
FPR2	0.3
GH1	0.3
GP1BA	0.3
GPX4	0.3
UBE2QL1	0.3
HCLS1	0.3
HLA-DOA	0.3
HLA-DPB2	0.3
TNC	0.3
ITPR2	0.3
LGALS9	0.3
NPR3	0.3
NRGN	0.3
OAZ2	0.3
OSM	0.3
RANBP3L	0.3
PTEN	0.3
PTPRN2	0.3
RDH5	0.3
CCL5	0.3
SELE	0.3
TEC	0.3
GXYLT2	0.3
CARMN	0.3
GRAPL	0.3
XPNPEP2	0.3
DMRTC1B	0.3
BFSP2	0.3
HSD17B6	0.3
MYOM1	0.3
WISP1	0.3
PGLYRP1	0.3
SLIT2	0.3
MICAL2	0.3
FCHSD2	0.3
SV2B	0.3
KCNE3	0.3
LRRC17	0.3
TLR6	0.3
BTN2A2	0.3
ATG7	0.3
LILRB1	0.3
ESM1	0.3
RASSF1	0.3
HECTD2	0.3
TREML1	0.3
GAL3ST4	0.3
HAND2-AS1	0.3
CPED1	0.3
SLC25A25	0.3
MIR4435-2HG	0.3
NOX4	0.3
ASAP1	0.3
SYT15	0.3
ANGPTL6	0.3
ARID5B	0.3
FKBP7	0.3
ZAK	0.3
CREBRF	0.3
LIME1	0.3
SSC5D	0.3
VSTM1	0.3
SUPT20HL1	0.3
SWAP70	0.3
KIAA0922	0.3
SYNM	0.3
EID1	0.3
JPH2	0.3
CEMIP	0.3
MXRA5	0.3
NLRP12	0.3
KIF19	0.3
WDR81	0.3
HPSE2	0.3
C16ORF86	0.3
GLTPD2	0.3
OR2T10	0.3
SLC43A3	0.3
NUGGC	0.3
SNX10	0.3
ACACB	0.29
ADRB3	0.29
APOE	0.29
CD1C	0.29
CD8A	0.29
CD19	0.29
CD81	0.29
CHN2	0.29
CR2	0.29
CTSB	0.29
RCAN1	0.29
ELK3	0.29
ETV5	0.29
FLNC	0.29
GSN	0.29
HLA-DRB5	0.29
AFAP1L1	0.29
JAK1	0.29
KCNN2	0.29
LAMC1	0.29
LTBP2	0.29
MITF	0.29
SEPHS1P1	0.29
PPP1R12B	0.29
NKG7	0.29
PNOC	0.29
PRF1	0.29
PTAFR	0.29
RXRG	0.29
RYR2	0.29
SOD2	0.29
TIMP3	0.29
TRPC6	0.29
CLIP2	0.29
SIGLEC16	0.29
C20ORF202	0.29
TUBA1A	0.29
SNX3	0.29
ATP6V0E1	0.29
CTIF	0.29
ACTR1A	0.29
EHD1	0.29
LILRA3	0.29
RAB31	0.29
NUDT6	0.29
C1ORF228	0.29
A2M-AS1	0.29
LINC00152	0.29
TREML2	0.29
GLDN	0.29
UBTD1	0.29
SCUBE1	0.29
GRIP2	0.29
C1QTNF2	0.29
TNFRSF13C	0.29
IL27	0.29
CD99L2	0.29
IL23R	0.29
MPC1	0.29
MURC	0.29
OLFM3	0.29
LOC100128164	0.29
TM6SF2	0.29
GPR88	0.29
SPINK13	0.29
C1ORF123	0.29
ZNF423	0.29
IKBIP	0.29
TTC28	0.29
HEPACAM	0.29
DUSP22	0.29
C15ORF57	0.29
ACSM2A	0.29
FAM19A5	0.29
EGFL6	0.29
RBMS3	0.29
MUSTN1	0.29
MAGEH1	0.29
PARVB	0.29
HSPA12A	0.29
MDFIC	0.29
PLA2G2C	0.29
LOC653653	0.29
MTMR14	0.29
ADCY5	0.28
RHOA	0.28
ARRB1	0.28
CALU	0.28
CAPZB	0.28
CDR1	0.28
CHRM2	0.28
DES	0.28
DTX1	0.28
ETV1	0.28
FCER2	0.28
FOXF2	0.28
GBX2	0.28
GZMB	0.28
IFNA4	0.28
ISG20	0.28
ITGAD	0.28
JAK2	0.28
KCNB1	0.28
PRSS35	0.28
NINJ2	0.28
NOVA1	0.28
[truncated: 18,439 more rows]

## Sheet: BRCA
PECAM1	0.83
TIE1	0.82
SH2D3C	0.81
ROBO4	0.81
ENG	0.8
ECSCR	0.8
ESAM	0.8
SCARF1	0.79
CD34	0.78
GNG11	0.78
CXORF36	0.78
PLVAP	0.78
CNRIP1	0.78
CLEC14A	0.78
ARHGEF15	0.77
CDH5	0.76
GJA4	0.76
HIC1	0.76
VWF	0.75
IGFBP7	0.74
HSPA12B	0.74
ADGRA2	0.74
BCL6B	0.74
GRASP	0.74
MMRN2	0.73
OAF	0.73
IFFO1	0.73
GIMAP1	0.72
CLDN5	0.72
STARD8	0.72
MFNG	0.71
PDE1B	0.71
C1ORF54	0.71
CYGB	0.71
S1PR1	0.7
ERG	0.7
NOVA2	0.7
NPR1	0.7
LDB2	0.7
CD248	0.7
APLNR	0.69
PTGIR	0.69
ST3GAL2	0.69
LHFP	0.69
PLEKHO2	0.69
USHBP1	0.69
PCDH12	0.69
THSD1	0.69
KANK3	0.69
C10ORF54	0.69
ADCY4	0.68
LYL1	0.68
NOTCH4	0.68
GRAP	0.68
TMEM204	0.68
MYCT1	0.68
PTRF	0.68
CD93	0.68
JAM2	0.68
ADGRL4	0.68
EBF1	0.67
ICAM2	0.67
ABI3	0.67
TMEM255B	0.67
PLAC9	0.67
FAM162B	0.67
FLI1	0.66
GPR4	0.66
GYPC	0.66
GSN	0.65
HSPG2	0.65
GMFG	0.65
TMEM119	0.65
SOX17	0.65
COL15A1	0.64
GNAI2	0.64
PDE2A	0.64
CCL14	0.64
TBXA2R	0.64
CCM2L	0.64
PEAR1	0.64
EMCN	0.64
PLPP7	0.64
DLL4	0.64
LY96	0.64
GIMAP8	0.64
RHOJ	0.64
EXOC3L2	0.64
TMEM88	0.64
EHD2	0.64
DPT	0.63
F10	0.63
FLT4	0.63
ACKR1	0.63
NDN	0.63
PDGFRB	0.63
CLEC3B	0.63
GIMAP6	0.63
CHST7	0.63
FMNL3	0.63
EFEMP2	0.63
ELFN1	0.63
ASGR2	0.62
AVPR2	0.62
CAV1	0.62
LRRC32	0.62
HLX	0.62
LSP1	0.62
SERPINF1	0.62
THY1	0.62
PHLDB1	0.62
PLXDC1	0.62
LRRN4CL	0.62
PODN	0.62
ARAP3	0.62
IL3RA	0.61
LMO2	0.61
SELP	0.61
TNFRSF1B	0.61
DOK2	0.61
NAALADL1	0.61
SYNPO	0.61
FAM124B	0.61
COL18A1	0.61
GPR146	0.61
CLEC1A	0.61
GNG2	0.61
SH3TC1	0.61
LRRC70	0.61
AIF1	0.6
EMP3	0.6
MMP19	0.6
TEK	0.6
TGFB1	0.6
TGFB1I1	0.6
TSPAN7	0.6
HYAL2	0.6
GPIHBP1	0.6
VAMP5	0.6
FAM110D	0.6
ADAM33	0.6
MFRP	0.6
DHH	0.6
NRIP2	0.6
MRGPRF	0.6
COX4I2	0.6
MILR1	0.6
GIMAP5	0.6
LIMS2	0.6
STAB1	0.6
ADGRF5	0.6
SERPING1	0.59
RARRES2	0.59
LST1	0.59
AOC3	0.59
INMT	0.59
LINC00924	0.59
NRROS	0.59
RASGRP4	0.59
GPBAR1	0.59
SOX18	0.59
RASIP1	0.59
SLC9A9	0.59
HEYL	0.59
CYTH4	0.59
BMX	0.58
EGFLAM	0.58
GGTA1P	0.58
MFAP4	0.58
MGAT1	0.58
MYO1F	0.58
NCF4	0.58
NNMT	0.58
NOS3	0.58
SPI1	0.58
VIM	0.58
ZEB2	0.58
CLEC2B	0.58
LINC00341	0.58
RIN3	0.58
HIGD1B	0.58
SHANK3	0.58
CCDC80	0.58
PRDM8	0.58
KIF17	0.58
CCDC69	0.58
LINC01366	0.58
POPDC2	0.58
FAM43A	0.57
CD1D	0.57
CETP	0.57
COL6A2	0.57
FOLR2	0.57
LAMA4	0.57
LRP1	0.57
PGF	0.57
STK10	0.57
TNXB	0.57
SPARCL1	0.57
SRPX	0.57
PPM1F	0.57
CORO2B	0.57
LINC01140	0.57
KCTD12	0.57
FERMT3	0.57
OLFML1	0.57
JAML	0.57
ZCCHC24	0.57
FFAR3	0.56
MCAM	0.56
PTPRB	0.56
RAB3IL1	0.56
TYROBP	0.56
PLPP1	0.56
GAB3	0.56
TNFSF12	0.56
SH2B3	0.56
KLF2	0.56
EMILIN1	0.56
ITIH5	0.56
VASH1	0.56
C11ORF96	0.56
C1ORF162	0.56
DPEP2	0.56
AQP1	0.55
CMKLR1	0.55
COL6A1	0.55
COL16A1	0.55
HCLS1	0.55
MEOX1	0.55
PDE1A	0.55
TNFRSF4	0.55
PSTPIP1	0.55
LY86	0.55
TNFAIP8L2	0.55
TRPV2	0.55
EXOC3L1	0.55
ANGPTL2	0.55
PALD1	0.55
CD33	0.54
CRYBB1	0.54
FOXS1	0.54
ITGA5	0.54
SNAI3	0.54
CXCL12	0.54
SELPLG	0.54
SIPA1	0.54
C10ORF128	0.54
TBX15	0.54
TNS1	0.54
WAS	0.54
WISP2	0.54
MAFB	0.54
HCST	0.54
TMEM173	0.54
C1QTNF6	0.54
CALHM2	0.54
ABCA6	0.54
FAM78A	0.54
CMTM3	0.54
SHE	0.54
GPSM3	0.54
C1R	0.53
PPM1M	0.53
CRHBP	0.53
LOC100240735	0.53
FHL1	0.53
GRID1	0.53
HLA-DPB1	0.53
MAF	0.53
GIMAP7	0.53
HTRA1	0.53
XPNPEP2	0.53
CLEC10A	0.53
TWIST2	0.53
GIMAP4	0.53
ARHGEF40	0.53
HEG1	0.53
AOC4P	0.53
LIX1L	0.53
ETS1	0.52
GGT5	0.52
AFAP1L1	0.52
ISLR	0.52
LTC4S	0.52
MMP2	0.52
CRTAP	0.52
SVEP1	0.52
COL5A3	0.52
COPZ2	0.52
TOR4A	0.52
KIAA1462	0.52
LRRC25	0.52
FAM212A	0.52
ST6GALNAC6	0.52
BMP1	0.51
PLK3	0.51
EPAS1	0.51
FES	0.51
FLT3LG	0.51
GNGT2	0.51
IGFBP6	0.51
ZNF366	0.51
MEF2C	0.51
CD200	0.51
PLCB2	0.51
FXYD1	0.51
MAPK11	0.51
PTGDS	0.51
CCDC102B	0.51
C19ORF35	0.51
PLEKHO1	0.51
ATOH8	0.51
P4HA3	0.51
WDR86	0.51
BATF3	0.51
FAM13C	0.51
ZBTB47	0.51
VSTM4	0.5
APOE	0.5
CLIC2	0.5
DNASE1L3	0.5
GEM	0.5
LAIR1	0.5
LOXL1	0.5
SCN4A	0.5
SLIT3	0.5
TAL1	0.5
WIPF1	0.5
GAS7	0.5
CH25H	0.5
PDLIM7	0.5
P2RY14	0.5
SPON2	0.5
LZTS1	0.5
PRKCDBP	0.5
LBH	0.5
RNF166	0.5
APBB1IP	0.5
NECAP2	0.5
CPXM1	0.5
MAP3K7CL	0.5
ARHGAP31	0.5
SCARF2	0.5
CHRDL1	0.5
LGI4	0.5
FMNL1	0.49
CYB5R3	0.49
GYPE	0.49
LGALS1	0.49
PCSK5	0.49
RNASE6	0.49
CCL23	0.49
SFRP4	0.49
TSPAN4	0.49
LAPTM5	0.49
SDPR	0.49
MMP23B	0.49
TNFRSF6B	0.49
TMEM37	0.49
ABCA8	0.49
FSTL1	0.49
IGFLR1	0.49
FAM167B	0.49
SMIM3	0.49
ITPRIP	0.49
PIK3R5	0.49
WDR81	0.49
LAT	0.49
HSPB6	0.49
CD209	0.49
RASAL3	0.49
RHOG	0.48
C1QA	0.48
CD4	0.48
CEBPE	0.48
EVI2A	0.48
FCN1	0.48
CFH	0.48
ID3	0.48
IL10RA	0.48
ITGA7	0.48
KLRB1	0.48
CD99	0.48
CFP	0.48
PTGER4	0.48
SLCO2A1	0.48
TCF4	0.48
ZYX	0.48
FIGNL2	0.48
NRP1	0.48
SPRY1	0.48
ABCA9	0.48
PIK3R6	0.48
NLRP3	0.48
DACT3	0.48
EMILIN2	0.48
PRAM1	0.48
SYDE1	0.48
ANTXR2	0.48
YPEL4	0.48
PLEKHM2	0.48
CLDN15	0.48
IL33	0.48
KANK2	0.48
MS4A6A	0.48
PDLIM2	0.48
CNN2	0.47
CSF1R	0.47
CTSG	0.47
F2R	0.47
CHST13	0.47
FBLN1	0.47
FGR	0.47
FHL3	0.47
GPX3	0.47
IL16	0.47
KDR	0.47
MAN2B1	0.47
CCL16	0.47
LTBP4	0.47
KCNAB2	0.47
CPZ	0.47
LDLRAD2	0.47
EBI3	0.47
RFX8	0.47
MYL9	0.47
LYVE1	0.47
LILRB5	0.47
C10ORF10	0.47
PRCD	0.47
PALM2-AKAP2	0.47
BTNL9	0.47
MEG3	0.47
TBC1D2B	0.47
SEMA3G	0.47
JDP2	0.47
OLFML2B	0.47
OPN4	0.47
PARVG	0.47
BST1	0.46
C7	0.46
CDH6	0.46
GLYCTK	0.46
RCBTB2	0.46
COL4A2	0.46
DTX1	0.46
FABP4	0.46
FTL	0.46
IGF1	0.46
PYGM	0.46
TBX2	0.46
TIMP1	0.46
LCNL1	0.46
MYOM1	0.46
CD300A	0.46
TMEM240	0.46
CD300LG	0.46
C1QTNF4	0.46
SOX7	0.46
JAM3	0.46
ANGPTL6	0.46
EGFL7	0.46
SLCO1C1	0.46
CPVL	0.46
ZNF575	0.46
NLRP1	0.46
MPEG1	0.46
HMHA1	0.46
PAPLN	0.46
RCN3	0.46
TMEM132C	0.46
EML3	0.46
HSPB7	0.46
ARHGAP30	0.46
EHD4	0.46
EBF2	0.46
ANK2	0.45
ENTPD1	0.45
CEACAM4	0.45
DCN	0.45
ELK3	0.45
CCR10	0.45
GRK5	0.45
GPX1	0.45
HOXD9	0.45
CYR61	0.45
INPP5D	0.45
LTBP2	0.45
CEP112	0.45
ABCB1	0.45
SFRP2	0.45
SLC1A7	0.45
ZEB1	0.45
PPP1R18	0.45
TPO	0.45
CAMK1	0.45
S1PR4	0.45
KLRG1	0.45
CORO1A	0.45
CCDC36	0.45
MCTP1	0.45
MOB3C	0.45
CCM2	0.45
MS4A4A	0.45
CYTL1	0.45
SASH3	0.45
GIPC2	0.45
CHST12	0.45
MAP7D1	0.45
ARHGAP15	0.45
SCARA5	0.45
DOCK6	0.45
TSHZ3	0.45
INAFM1	0.45
NAPSB	0.45
MOB3A	0.45
ARHGAP9	0.45
AQP7	0.44
BGN	0.44
LIMS3-LOC440895	0.44
CD81	0.44
COL4A1	0.44
COL6A3	0.44
DAB2	0.44
EDNRB	0.44
EFNB1	0.44
FOXO1	0.44
FMO1	0.44
GLI2	0.44
GZMM	0.44
IL11RA	0.44
ITGB2	0.44
LIPE	0.44
PLTP	0.44
SRGN	0.44
RDH5	0.44
SLC12A4	0.44
TBXAS1	0.44
TMSB4XP8	0.44
COL14A1	0.44
CST7	0.44
DOCK11	0.44
CABP1	0.44
FEZ1	0.44
ARHGAP25	0.44
RCAN2	0.44
TWF2	0.44
PREX2	0.44
AKNA	0.44
RILP	0.44
HSD17B11	0.44
LGI2	0.44
RASA3	0.44
EBF3	0.44
HTRA3	0.44
RFTN2	0.44
ARRB2	0.43
CD68	0.43
DUSP1	0.43
HLA-E	0.43
HTR2B	0.43
ICAM3	0.43
JAK3	0.43
KCNS2	0.43
LGALS2	0.43
SPNS3	0.43
NID1	0.43
NRGN	0.43
PCOLCE	0.43
PDGFRL	0.43
RAC2	0.43
TCN2	0.43
VAV1	0.43
CLIP2	0.43
LAT2	0.43
ANGPTL1	0.43
RAB33A	0.43
FHL5	0.43
ABCC9	0.43
DLC1	0.43
ARSI	0.43
FBXO31	0.43
PODNL1	0.43
DOK3	0.43
OTOA	0.43
G0S2	0.43
CARD6	0.43
CCDC88B	0.43
ADAP2	0.43
TNS2	0.43
HEPACAM	0.43
SHROOM4	0.43
EHBP1L1	0.43
VENTX	0.43
LIMS3	0.43
CD1C	0.42
CD6	0.42
TNFRSF8	0.42
COL1A1	0.42
GPR183	0.42
GPD1	0.42
NCKAP1L	0.42
MATK	0.42
MSX1	0.42
GADD45B	0.42
PCDHGC3	0.42
PDE6G	0.42
ENPP2	0.42
PLIN1	0.42
S100Z	0.42
C14ORF180	0.42
TLR4	0.42
VEGFB	0.42
WNT9B	0.42
PLPP3	0.42
RASSF2	0.42
CELF2	0.42
CD300C	0.42
SLCO2B1	0.42
CORO7	0.42
UBTD1	0.42
EEPD1	0.42
LOC606724	0.42
SH3BGRL3	0.42
CRISPLD2	0.42
GALNT15	0.42
MXRA8	0.42
RFTN1	0.42
SYT11	0.42
PRND	0.42
PLSCR3	0.42
P2RY8	0.42
GJC2	0.42
FGD2	0.42
CTDSP1	0.42
SLC39A13	0.42
ARRDC2	0.42
SRPX2	0.42
GPR132	0.42
SYNE3	0.42
KCNIP2	0.42
CIDEC	0.42
LOC654342	0.42
AEBP1	0.41
ASPA	0.41
AXL	0.41
BTK	0.41
CMA1	0.41
CYBA	0.41
ECM2	0.41
FLNC	0.41
GLI1	0.41
IL4R	0.41
LAMA2	0.41
MMP14	0.41
PPARG	0.41
PTPRCAP	0.41
ABCD4	0.41
RPS6KA2	0.41
SPN	0.41
TPM2	0.41
ZFP36	0.41
ST8SIA4	0.41
UTF1	0.41
RECK	0.41
PLIN4	0.41
DCHS1	0.41
SOCS3	0.41
CALCRL	0.41
MRVI1	0.41
LILRB3	0.41
VSIG4	0.41
FAM65A	0.41
KCTD17	0.41
CLEC4GP1	0.41
ADAMTS10	0.41
STAC3	0.41
ARHGAP24	0.41
CERCAM	0.41
GMIP	0.41
ACSM5	0.41
PRR34	0.41
NID2	0.41
PRR5	0.41
HABP4	0.41
RGL1	0.41
PPP1R15A	0.41
SLC2A7	0.41
ARHGAP20	0.41
MKL1	0.41
PI16	0.41
IGDCC4	0.41
PPP1R16B	0.41
LCN6	0.41
GIPC3	0.41
CLECL1	0.41
MYO1G	0.41
RGS18	0.41
ADA	0.4
AOAH	0.4
CD200R1	0.4
CD5	0.4
CD28	0.4
CD37	0.4
CD48	0.4
CD53	0.4
CD63	0.4
DAZL	0.4
SEPT1	0.4
DOCK2	0.4
FBLN2	0.4
FGF7	0.4
FPR1	0.4
GRN	0.4
HLA-DMA	0.4
IRF8	0.4
JUNB	0.4
KIFC3	0.4
RGL4	0.4
PIK3CD	0.4
PRRX1	0.4
SCN4B	0.4
SOD3	0.4
VEGFC	0.4
DYSF	0.4
SEMA7A	0.4
STX11	0.4
TNFRSF14	0.4
AP1M1	0.4
ACAP1	0.4
GFPT2	0.4
RASA4	0.4
LAMC3	0.4
PROCR	0.4
NPC2	0.4
FILIP1L	0.4
EFHD2	0.4
LRRC2	0.4
TBC1D10C	0.4
MAP1LC3C	0.4
LIMD2	0.4
AQP7P1	0.4
PIK3IP1	0.4
APOLD1	0.4
TMC8	0.4
GLIS1	0.4
IFI27L2	0.4
ARAP1	0.4
HDAC7	0.4
CARD11	0.4
C10ORF105	0.4
SYPL2	0.4
TMEM140	0.4
GPR150	0.4
CPNE2	0.4
NCKAP5L	0.4
JAZF1	0.4
NLRC4	0.4
LMOD1	0.4
KIF26A	0.4
SPNS2	0.4
FREM1	0.4
CC2D2B	0.4
MUSTN1	0.4
FNDC4	0.4
ADH1B	0.39
ARHGAP4	0.39
PRDM1	0.39
CD3D	0.39
ETS2	0.39
EVI2B	0.39
FCER1A	0.39
FCER1G	0.39
FYN	0.39
GAS6	0.39
GZMK	0.39
LCAT	0.39
LCP2	0.39
PROS1	0.39
PTPN7	0.39
RCVRN	0.39
RGS3	0.39
RNASE1	0.39
CLEC11A	0.39
TGFBR2	0.39
F2RL3	0.39
ARHGEF1	0.39
SLIT2	0.39
GRAP2	0.39
ADAMTS14	0.39
ELMO1	0.39
TSPAN32	0.39
RAPGEF3	0.39
PDPN	0.39
LAYN	0.39
PVRIG	0.39
SLC8B1	0.39
TNFSF12-TNFSF13	0.39
C8ORF58	0.39
GLT8D2	0.39
MARCH2	0.39
RASL12	0.39
HVCN1	0.39
HHIPL1	0.39
MMRN1	0.39
PLXND1	0.39
IKBIP	0.39
MRAP	0.39
CRTAM	0.39
PLD4	0.39
WDFY4	0.39
DNAJB5	0.39
OSCAR	0.39
ROBO3	0.39
CSRNP1	0.39
EMX2OS	0.39
RILPL2	0.39
AVPR1A	0.38
C1QC	0.38
CA4	0.38
CASP4	0.38
CD3E	0.38
CD247	0.38
CD27	0.38
CD40	0.38
CD69	0.38
CD74	0.38
COL3A1	0.38
COL5A1	0.38
CST3	0.38
PHC2	0.38
MEGF6	0.38
FAP	0.38
GJA5	0.38
CXCR3	0.38
HLA-DPA1	0.38
HLA-DRB6	0.38
HSD11B1	0.38
ITGAX	0.38
LAMB1	0.38
LCK	0.38
LY9	0.38
MFAP2	0.38
MOCS1	0.38
PF4	0.38
LGMN	0.38
RRAS	0.38
SLC2A3	0.38
TIMP2	0.38
TNFRSF1A	0.38
GRAPL	0.38
MSC	0.38
ADIPOQ	0.38
PLPPR4	0.38
GLYAT	0.38
RAMP2	0.38
ABCA10	0.38
NOD1	0.38
MXD4	0.38
TXNIP	0.38
TRIOBP	0.38
CLEC4G	0.38
TREML1	0.38
MMP28	0.38
PRR5L	0.38
ABTB1	0.38
ABHD17A	0.38
ANGPT4	0.38
AGAP2	0.38
MEDAG	0.38
IL17D	0.38
UBASH3A	0.38
FAM159A	0.38
FUOM	0.38
C16ORF54	0.38
SMIM10	0.38
PPP1R12C	0.38
SIRPB2	0.38
RNPEPL1	0.38
TSPAN18	0.38
KLHL33	0.38
FAM26E	0.38
PAMR1	0.38
TPK1	0.38
SIGLEC7	0.38
SIT1	0.38
C16ORF86	0.38
DBNL	0.38
MDFIC	0.38
LOC653786	0.38
P3H1	0.38
BRE-AS1	0.38
DNM1P46	0.37
ASIP	0.37
C3	0.37
SERPINH1	0.37
CD40LG	0.37
CEBPD	0.37
EVC2	0.37
HBEGF	0.37
HLA-DMB	0.37
IL10	0.37
ILK	0.37
ITIH3	0.37
LEPR	0.37
MMP9	0.37
MYO9B	0.37
PDK4	0.37
PTGIS	0.37
OLFML2A	0.37
SPARC	0.37
TAGLN	0.37
THBD	0.37
GPR65	0.37
CACNA1G	0.37
ADAMTS2	0.37
ADAMTSL2	0.37
LPAR6	0.37
RASGRP2	0.37
LILRB2	0.37
IKZF1	0.37
DBX2	0.37
GAL3ST4	0.37
RPLP0P2	0.37
BTBD19	0.37
MIR503HG	0.37
NKD2	0.37
TREM2	0.37
MAGEL2	0.37
METRNL	0.37
SNRK	0.37
LIME1	0.37
LINC00264	0.37
SAMD3	0.37
KLHL4	0.37
KIAA0930	0.37
MSRB3	0.37
LHX6	0.37
PDE7B	0.37
SIGLEC9	0.37
RBMS3	0.37
RRN3P2	0.37
ACP5	0.36
ADCYAP1R1	0.36
C1QB	0.36
C3AR1	0.36
C5AR1	0.36
CAPZB	0.36
CASQ2	0.36
CD2	0.36
CD86	0.36
ADGRE5	0.36
FOXN3	0.36
CR1	0.36
CTSB	0.36
DPYSL3	0.36
F2RL2	0.36
FUT7	0.36
ADM5	0.36
IGFBP4	0.36
MEOX2	0.36
MYL3	0.36
NBL1	0.36
NGFR	0.36
PLEK	0.36
PSMB10	0.36
CCL19	0.36
SLA	0.36
ZCCHC5	0.36
TGFB3	0.36
TLL1	0.36
TNNT3	0.36
UPP1	0.36
VIP	0.36
LOC728392	0.36
ZAP70	0.36
TFEB	0.36
CILP	0.36
PDLIM4	0.36
SLC7A7	0.36
THEMIS2	0.36
GDF3	0.36
TESPA1	0.36
DCANP1	0.36
ARPC1B	0.36
TCIRG1	0.36
MAP4K1	0.36
FAT4	0.36
PEAK1	0.36
RNF122	0.36
LINC00982	0.36
CXORF21	0.36
AZIN2	0.36
HEPN1	0.36
TUBB6	0.36
NTNG2	0.36
MIR22HG	0.36
SOWAHD	0.36
LCN10	0.36
FAM20A	0.36
PALMD	0.36
ISCU	0.36
PLSCR4	0.36
KLHL6	0.36
TBC1D22A	0.36
ABI3BP	0.36
LOC91450	0.36
PPP1R3G	0.36
RCSD1	0.36
TMEM44	0.36
C11ORF21	0.36
GLTSCR2	0.36
TBX21	0.36
TAX1BP3	0.36
FAM101B	0.36
NCF1C	0.36
ACTA2	0.35
ADPRH	0.35
ASGR1	0.35
C21ORF2	0.35
CDH13	0.35
CPA1	0.35
CSK	0.35
CTSZ	0.35
DPEP1	0.35
FLT1	0.35
GP9	0.35
GPR34	0.35
RAPGEF1	0.35
HRH1	0.35
LEP	0.35
NINJ2	0.35
CLDN11	0.35
OXT	0.35
PGM5	0.35
PKD2	0.35
POU2F2	0.35
PRKCB	0.35
PRKCH	0.35
S100A3	0.35
SMTN	0.35
FAM180B	0.35
MIR100HG	0.35
TLN1	0.35
TRADD	0.35
FGF18	0.35
RRN3P1	0.35
ADAMTS1	0.35
LVRN	0.35
IFI30	0.35
SEMA6B	0.35
FGL2	0.35
GLIPR1	0.35
C1QTNF9	0.35
AKAP2	0.35
FAM109A	0.35
C3ORF36	0.35
SLFN14	0.35
CD300LF	0.35
DEFB124	0.35
CTHRC1	0.35
DEF6	0.35
FKBP7	0.35
ASB2	0.35
LCE3D	0.35
HAVCR2	0.35
ANKDD1A	0.35
BNC2	0.35
C1ORF123	0.35
UACA	0.35
CCDC152	0.35
LCE3C	0.35
IGFN1	0.35
TNFAIP8	0.35
SNX20	0.35
GIMAP2	0.35
GBGT1	0.35
HPGDS	0.35
CYS1	0.35
RGCC	0.35
NCF1	0.35
ERICH4	0.35
MICAL1	0.35
ADRB2	0.34
C1S	0.34
NLRC3	0.34
CASP10	0.34
CD72	0.34
CRYGS	0.34
CTSW	0.34
DAPK3	0.34
DUSP2	0.34
EGR1	0.34
EMX2	0.34
HLA-DRA	0.34
CFI	0.34
INSL3	0.34
LGALS9	0.34
MNDA	0.34
NFATC1	0.34
NUCB1	0.34
PPIC	0.34
RBMS2	0.34
RNH1	0.34
SLAMF1	0.34
SNAI2	0.34
SPRR2G	0.34
TBX5	0.34
TNFAIP3	0.34
TRAF1	0.34
PTCRA	0.34
ADAM12	0.34
CYTH3	0.34
TRIP10	0.34
LPXN	0.34
H6PD	0.34
GPRASP1	0.34
MRC2	0.34
MVP	0.34
NR1H3	0.34
SORBS3	0.34
ATG7	0.34
SLC19A3	0.34
TSPAN11	0.34
CNPY4	0.34
TMEM246	0.34
TAGAP	0.34
PHYKPL	0.34
SSC5D	0.34
LOC645166	0.34
GPR142	0.34
KLRK1	0.34
RTP5	0.34
IL26	0.34
PLCL2	0.34
ZFPM2	0.34
LAMP5	0.34
THSD7A	0.34
TPGS1	0.34
GPR153	0.34
APOBEC3C	0.34
BACH2	0.34
APOBEC3G	0.34
SCIMP	0.34
SERTAD1	0.34
PILRA	0.34
ZNF831	0.34
SAMSN1	0.34
ABCD2	0.33
BIN1	0.33
CAV2	0.33
RUNX1T1	0.33
CD7	0.33
TNFSF8	0.33
CD36	0.33
CHKB	0.33
CCR5	0.33
DGKA	0.33
EGR2	0.33
MECOM	0.33
FOXF2	0.33
FOS	0.33
GZMA	0.33
ID1	0.33
IL2RG	0.33
ITGA1	0.33
ITGAL	0.33
ITGB5	0.33
ITK	0.33
LMNA	0.33
LUM	0.33
PITX3	0.33
PNOC	0.33
GAPT	0.33
PTPRM	0.33
RPS9	0.33
CCL21	0.33
SH3GL1	0.33
SLC5A4	0.33
STAT4	0.33
ADAM19	0.33
IL18R1	0.33
MAP3K14	0.33
TBKBP1	0.33
SPOCK2	0.33
AP5Z1	0.33
KCNE3	0.33
ARPC2	0.33
RGS19	0.33
AGPAT2	0.33
FERMT2	0.33
CCDC85B	0.33
B4GALT7	0.33
ZNF668	0.33
DENND1C	0.33
L3HYPDH	0.33
AQP7P3	0.33
FCRL6	0.33
CDC42EP5	0.33
IL21R	0.33
TBC1D10A	0.33
LINC00162	0.33
SLC15A3	0.33
MEI1	0.33
PTPN5	0.33
MBD3	0.33
P2RY13	0.33
CCDC50	0.33
PCDH18	0.33
MIER2	0.33
LRCH1	0.33
TTC28	0.33
PLD3	0.33
HCG22	0.33
FLRT2	0.33
TCEAL7	0.33
TUSC5	0.33
LRCH2	0.33
HMHB1	0.33
PXDC1	0.33
CD300LB	0.33
LATS2	0.33
SCML4	0.33
ST6GALNAC3	0.33
TSSC2	0.33
WTIP	0.33
DLL1	0.33
CDH23	0.33
ACTB	0.32
ADH1A	0.32
FXYD2	0.32
ZFP36L2	0.32
CCIN	0.32
CD79B	0.32
CIDEA	0.32
CCR4	0.32
COL1A2	0.32
DPYSL2	0.32
FCGR2B	0.32
HBA2	0.32
HLA-DRB1	0.32
JUN	0.32
KCND1	0.32
SH2D1A	0.32
MAB21L1	0.32
NAP1L3	0.32
POU6F1	0.32
PTPRC	0.32
RASGRF2	0.32
SGK1	0.32
SHOX2	0.32
SSBP4	0.32
SNCA	0.32
CCDC107	0.32
ELL	0.32
FZD4	0.32
CCRL2	0.32
STK17B	0.32
CD163	0.32
STOML1	0.32
AKAP12	0.32
TLDC2	0.32
CHSY3	0.32
CD96	0.32
TNIP1	0.32
RASSF1	0.32
ARHGAP10	0.32
ANKRD53	0.32
PQLC1	0.32
TRAF3IP3	0.32
CD276	0.32
APOL5	0.32
SLAMF6	0.32
C1QTNF1	0.32
C1QTNF7	0.32
HSD17B13	0.32
UBXN1	0.32
PYHIN1	0.32
DACT1	0.32
BIN2	0.32
RAB8B	0.32
GLIS2	0.32
H19	0.32
CLEC9A	0.32
CPXM2	0.32
TMEM150B	0.32
CARD8	0.32
MPRIP	0.32
TNFRSF13B	0.32
LILRA4	0.32
ZNF775	0.32
SNX21	0.32
LCE3E	0.32
LMF2	0.32
SNED1	0.32
NEXN	0.32
FIBIN	0.32
CCDC102A	0.32
TRIM61	0.32
ALOX5	0.31
ALOX5AP	0.31
MEF2B	0.31
CALD1	0.31
CD8A	0.31
CDX1	0.31
CTGF	0.31
CTSH	0.31
CTSK	0.31
FBN1	0.31
FIGF	0.31
NR5A2	0.31
GFI1	0.31
HBA1	0.31
HOXA4	0.31
IL2	0.31
INPP1	0.31
LTA	0.31
MAP3K3	0.31
MAP3K11	0.31
NKG7	0.31
PALM	0.31
PFDN5	0.31
SLC2A5	0.31
TRPC2	0.31
CUBN	0.31
GPR68	0.31
CCR2	0.31
IKBKG	0.31
FAM127A	0.31
MAP3K6	0.31
PCSK7	0.31
S1PR2	0.31
KLF4	0.31
GSTO1	0.31
ITM2A	0.31
SELM	0.31
GIT2	0.31
IL18BP	0.31
ARFRP1	0.31
LHFPL2	0.31
PRG4	0.31
SORBS1	0.31
LILRB1	0.31
C9ORF16	0.31
CHMP6	0.31
HAND2-AS1	0.31
CCDC178	0.31
NR2F1-AS1	0.31
NPL	0.31
MOB2	0.31
DOCK8	0.31
VGLL2	0.31
CYYR1	0.31
LINC00426	0.31
SLA2	0.31
CECR1	0.31
TM6SF1	0.31
EVA1B	0.31
SIRPG	0.31
NAGK	0.31
DOK4	0.31
LMBR1L	0.31
ZNF423	0.31
FAM20C	0.31
ADAMTS9	0.31
SLC17A7	0.31
TICAM2	0.31
CLIP3	0.31
GVINP1	0.31
TDRD10	0.31
VGLL3	0.31
ANXA2R	0.31
DSE	0.31
PKN3	0.31
TSHZ2	0.31
WDR13	0.31
SMAP2	0.31
NCF1B	0.31
A2M	0.3
ACACB	0.3
ALDH1A1	0.3
CD1E	0.3
CD3G	0.3
COL5A2	0.3
CTSL	0.3
EMP1	0.3
FOXF1	0.3
FOSB	0.3
FYB	0.3
GAS1	0.3
HCK	0.3
HK3	0.3
HLA-DOA	0.3
HOXC8	0.3
IL7R	0.3
IL12B	0.3
ITGB7	0.3
LTB	0.3
P2RX1	0.3
SERPINE1	0.3
PER1	0.3
TIFAB	0.3
RENBP	0.3
CCL2	0.3
STX4	0.3
TCF7	0.3
TDGF1	0.3
ZBTB17	0.3
EOMES	0.3
MAD1L1	0.3
TPST1	0.3
FCN3	0.3
TNFRSF25	0.3
TNFSF14	0.3
IL18RAP	0.3
RAB11B	0.3
APOBEC3D	0.3
BCAR1	0.3
IER2	0.3
CROCC	0.3
FAM65B	0.3
PLEKHM1	0.3
RUSC2	0.3
NAALAD2	0.3
TOM1	0.3
P3H3	0.3
USP20	0.3
PTP4A3	0.3
LILRA6	0.3
CHST14	0.3
APOL3	0.3
EGFL8	0.3
SH3RF3	0.3
CILP2	0.3
ARHGEF25	0.3
VILL	0.3
AMDHD2	0.3
SDF4	0.3
CCDC8	0.3
CREB3L3	0.3
TCF23	0.3
DPPA4	0.3
PI4K2A	0.3
WSCD1	0.3
CBX7	0.3
RUNDC3B	0.3
PHLDA3	0.3
BHMT2	0.3
LYPD8	0.3
DUSP22	0.3
PLEKHA4	0.3
TMEM259	0.3
LILRA5	0.3
C17ORF49	0.3
ADAMTSL1	0.3
TMIGD2	0.3
FHOD1	0.3
GPR171	0.3
PINK1	0.3
ALDH2	0.29
APOC1	0.29
ARL2	0.29
KLF9	0.29
CDO1	0.29
COX7A1	0.29
EPB42	0.29
GPX8	0.29
GNL1	0.29
GZMH	0.29
HBB	0.29
GGN	0.29
HLA-DQB1	0.29
FAAP20	0.29
ZNF300P1	0.29
IFI16	0.29
IL12RB1	0.29
LAMC1	0.29
LCP1	0.29
MAP1A	0.29
MYL6	0.29
NCF2	0.29
TIGIT	0.29
SERPINB9	0.29
PIP4K2A	0.29
PMCH	0.29
PPP3CC	0.29
SCN1B	0.29
CCL5	0.29
OIT3	0.29
SLC22A3	0.29
TDGF1P3	0.29
GXYLT2	0.29
WNT2	0.29
MFAP5	0.29
PRRT4	0.29
FCMR	0.29
ITGBL1	0.29
ITM2B	0.29
CDC42EP2	0.29
LILRA1	0.29
OR51E1	0.29
ZC3H12D	0.29
CHPF	0.29
C14ORF37	0.29
FRMD1	0.29
BICC1	0.29
MIAT	0.29
SLC35G2	0.29
URM1	0.29
ZNF524	0.29
NOX4	0.29
SLC22A12	0.29
CLEC4A	0.29
MARVELD1	0.29
HMCN1	0.29
NAGPA	0.29
PRRX2	0.29
LRRC8C	0.29
POLR3GL	0.29
CATSPER1	0.29
TMEM91	0.29
FAM109B	0.29
NFAM1	0.29
LGALS12	0.29
KLB	0.29
SIGLEC17P	0.29
PIK3CD-AS1	0.29
DENND3	0.29
RUFY4	0.29
KIF21B	0.29
SH3PXD2B	0.29
LRRC8A	0.29
ADGRG5	0.29
SORCS2	0.29
ALPK3	0.29
ARHGAP23	0.29
NRN1L	0.29
PRKD2	0.29
MXRA5	0.29
PCDHGA12	0.29
SLFN11	0.29
NKAPL	0.29
JOSD2	0.29
ZDHHC8	0.29
NCR3	0.29
MDS2	0.29
SH3KBP1	0.29
GPATCH3	0.29
ARSB	0.28
MLKL	0.28
VPS51	0.28
CD79A	0.28
CDH11	0.28
CDKN1C	0.28
CNN1	0.28
KLF6	0.28
VCAN	0.28
CTSS	0.28
TYMP	0.28
F13A1	0.28
PTK2B	0.28
FCGR1B	0.28
FCGRT	0.28
GPR18	0.28
HGF	0.28
HLA-DQA2	0.28
HMOX1	0.28
NR4A1	0.28
IL10RB	0.28
JAG2	0.28
KCNN3	0.28
LOX	0.28
LTBP3	0.28
CIITA	0.28
MPP1	0.28
NPR2	0.28
PDCD1	0.28
PLA2G5	0.28
PPIB	0.28
PRF1	0.28
PSAP	0.28
PTPN6	0.28
CCL3	0.28
SGCD	0.28
ST3GAL3	0.28
SMPD1	0.28
ST5	0.28
STAT5A	0.28
TPSAB1	0.28
CARMN	0.28
NR1H2	0.28
ZNF80	0.28
C9ORF139	0.28
PTCH2	0.28
GYG2	0.28
ITGB1BP1	0.28
CYTIP	0.28
CBLN4	0.28
SH3PXD2A	0.28
KIAA0355	0.28
NEURL2	0.28
ARPC4	0.28
RABAC1	0.28
EHD1	0.28
CDC37	0.28
PKIG	0.28
ADAMTS7	0.28
SP140	0.28
MIB2	0.28
TNIP2	0.28
LENG1	0.28
NDUFS7	0.28
LINC00152	0.28
SPSB1	0.28
LRRC18	0.28
SLC27A1	0.28
SPRY4	0.28
LURAP1	0.28
MIR4435-2HG	0.28
CNIH3	0.28
RBP7	0.28
C11ORF68	0.28
NRN1	0.28
ALKBH7	0.28
SIRT6	0.28
CDPF1	0.28
DCLK3	0.28
TM6SF2	0.28
BTLA	0.28
CCDC12	0.28
C3ORF79	0.28
TRAPPC3L	0.28
DNAJC17	0.28
BIN3	0.28
TEX29	0.28
PLA2G15	0.28
SLAMF8	0.28
FCHSD1	0.28
CEACAM21	0.28
STAMBPL1	0.28
CPNE5	0.28
RASGRP3	0.28
C20ORF194	0.28
IPCEF1	0.28
LRRTM2	0.28
LOXHD1	0.28
TVP23A	0.28
DKK3	0.28
PCED1B-AS1	0.28
GNG8	0.28
TMEM176B	0.28
IL4I1	0.28
DMGDH	0.28
HES3	0.28
TRABD2A	0.28
ADARB1	0.27
AKR1B1	0.27
SNAI3-AS1	0.27
CXCR5	0.27
TSPO	0.27
CA5A	0.27
CAMK4	0.27
CEBPA	0.27
CENPB	0.27
CKB	0.27
CSF2RB	0.27
CYP11A1	0.27
ACSL4	0.27
FLNA	0.27
GPR21	0.27
GUK1	0.27
HRC	0.27
IL9R	0.27
IRF3	0.27
KCNA3	0.27
MSN	0.27
MSRA	0.27
NAGLU	0.27
NFKBIA	0.27
NT5E	0.27
OAZ1	0.27
PIK3CG	0.27
PML	0.27
RPS15	0.27
S100A4	0.27
R3HCC1	0.27
XCL2	0.27
LINC00116	0.27
RPS6KA4	0.27
TMSB10	0.27
RNF144A	0.27
ISM1	0.27
SIRPA	0.27
MED16	0.27
SIGLEC14	0.27
CD226	0.27
LILRB4	0.27
LILRA2	0.27
ADAMTS6	0.27
ABCB5	0.27
FBXL15	0.27
MAP7D3	0.27
RNASEK	0.27
PDGFD	0.27
ADAT3	0.27
CHST11	0.27
RASSF5	0.27
CCDC3	0.27
FOXP3	0.27
MRO	0.27
ARL6IP4	0.27
GTSF1L	0.27
MED15	0.27
CD244	0.27
FCRLA	0.27
TOX2	0.27
TRHDE-AS1	0.27
TLR9	0.27
C19ORF60	0.27
MAST3	0.27
RNF130	0.27
SEPT6	0.27
FAM13A-AS1	0.27
HLA-F-AS1	0.27
FKBP8	0.27
CRYGN	0.27
AGPAT4	0.27
PLEKHG5	0.27
NLGN2	0.27
THAP3	0.27
HAMP	0.27
RPS19BP1	0.27
PCDH17	0.27
CSDC2	0.27
RRP7A	0.27
CXORF65	0.27
ALDH16A1	0.27
MIR99AHG	0.27
HIGD2A	0.27
TFPT	0.27
TNN	0.27
SPRR4	0.27
A1BG	0.26
AGER	0.26
ANGPT2	0.26
ARHGAP1	0.26
ARHGAP6	0.26
BAX	0.26
BLK	0.26
C6	0.26
COL6A6	0.26
APOBEC3H	0.26
CLCN6	0.26
CNR2	0.26
COMP	0.26
CSF2RA	0.26
CTLA4	0.26
DFNA5	0.26
PARP15	0.26
DPP4	0.26
DPYD	0.26
TSC22D3	0.26
ETFB	0.26
FCGR1A	0.26
XCR1	0.26
GPX7	0.26
GUCY1B3	0.26
IL15RA	0.26
JUND	0.26
FADS3	0.26
LOXL2	0.26
MN1	0.26
PDE3B	0.26
PDGFRA	0.26
PTAFR	0.26
PTPRE	0.26
RGS1	0.26
RGS16	0.26
RNASE3	0.26
RPL13	0.26
SKI	0.26
SLC2A4	0.26
STK11	0.26
TK2	0.26
TNFAIP6	0.26
TWIST1	0.26
UBA7	0.26
VASP	0.26
CNTNAP1	0.26
APOL1	0.26
NPFF	0.26
ASMTL	0.26
EIF3G	0.26
SIGLEC5	0.26
AP1S2	0.26
AIP	0.26
CYTH1	0.26
BCL7C	0.26
TP53I3	0.26
APBA3	0.26
ZBTB46	0.26
TRAM2	0.26
SNX17	0.26
PLIN3	0.26
LRRC17	0.26
SPRY2	0.26
POSTN	0.26
ADAMTS5	0.26
AKAP13	0.26
GPR182	0.26
MGLL	0.26
CPNE8	0.26
MXRA7	0.26
ARHGAP28	0.26
SYNDIG1	0.26
LRFN5	0.26
FAM49A	0.26
ITM2C	0.26
TLR10	0.26
FCRL3	0.26
TRAT1	0.26
FIS1	0.26
NOSIP	0.26
ACKR4	0.26
KBTBD8	0.26
GPR174	0.26
SH3D19	0.26
SPIN2A	0.26
CHPF2	0.26
WBP1L	0.26
RNF125	0.26
SOBP	0.26
MAP1S	0.26
KIRREL	0.26
CSGALNACT1	0.26
SAMD4A	0.26
FNBP1	0.26
PCDHGB7	0.26
PCDHB12	0.26
CYB561A3	0.26
SH3BP1	0.26
MICU3	0.26
OLFML3	0.26
ATP8B2	0.26
VPS18	0.26
ARHGAP22	0.26
BRI3	0.26
CCDC9	0.26
SLC38A10	0.26
DENND2A	0.26
ZNF276	0.26
ZNF428	0.26
CACNA2D4	0.26
LAMTOR4	0.26
ODF3L1	0.26
ADGRE4P	0.26
RNF25	0.26
AAED1	0.26
PLEKHG2	0.26
ACVR1C	0.26
PAOX	0.25
ANXA6	0.25
APOC1P1	0.25
RHOC	0.25
CD19	0.25
CLIC1	0.25
CRHR2	0.25
CSNK1G2	0.25
CYBB	0.25
DPYS	0.25
DRD4	0.25
FKBP1A	0.25
GM2A	0.25
GP1BA	0.25
GPC1	0.25
UTS2R	0.25
GPR20	0.25
ZBTB48	0.25
HLA-DRB5	0.25
HOXD10	0.25
ICAM4	0.25
IL6	0.25
MAN2C1	0.25
MMP11	0.25
MYH9	0.25
PPP1R12B	0.25
P2RY11	0.25
ABCB4	0.25
POU2AF1	0.25
MAP2K2	0.25
MASP1	0.25
RBMS1	0.25
RPS14	0.25
SCN2B	0.25
CCL4	0.25
ITSN1	0.25
SLC1A3	0.25
SIGLEC1	0.25
SNRNP70	0.25
SYK	0.25
THBS2	0.25
TLE4	0.25
TRPC1	0.25
UROD	0.25
NR4A3	0.25
CCDC61	0.25
SOCS1	0.25
SDC3	0.25
TSSC4	0.25
ARL4C	0.25
PLXNC1	0.25
IGSF6	0.25
PEMT	0.25
CXCR6	0.25
C17ORF62	0.25
KIAA0226L	0.25
CCDC92	0.25
PDCD1LG2	0.25
C5ORF56	0.25
UBXN6	0.25
PBX4	0.25
THSD7B	0.25
CYP2U1	0.25
UNC45B	0.25
DCSTAMP	0.25
LINC00906	0.25
DIRC1	0.25
KCTD10	0.25
C10ORF11	0.25
ZNF219	0.25
TLR7	0.25
PLAC8	0.25
NUDT22	0.25
OR2A1	0.25
ZGPAT	0.25
FAM126A	0.25
CLIC5	0.25
A4GALT	0.25
SGTB	0.25
ARL15	0.25
FBLIM1	0.25
BORCS6	0.25
TMEM255A	0.25
MSX2P1	0.25
ARRDC5	0.25
TCF25	0.25
PCDHB15	0.25
PIP5K1C	0.25
COTL1	0.25
SLC7A10	0.25
APOL2	0.25
CASS4	0.25
PGLS	0.25
PLXNA4	0.25
THEMIS	0.25
RPL13AP20	0.25
FKBP10	0.25
NUGGC	0.25
ICOS	0.25
UBAP1L	0.25
RAB37	0.25
VWA1	0.25
ANXA11	0.24
UBL4B	0.24
ARSA	0.24
CD8B	0.24
AP2S1	0.24
CCR1	0.24
DNM1	0.24
EDNRA	0.24
ELN	0.24
EVC	0.24
FCER2	0.24
FCGR2A	0.24
FKBP2	0.24
GCKR	0.24
HEXA	0.24
HLA-DQA1	0.24
LHCGR	0.24
LIPA	0.24
LPL	0.24
KLHDC8B	0.24
MT1M	0.24
NFKBIE	0.24
PHF1	0.24
PTGER1	0.24
RBP4	0.24
RGS13	0.24
RPL10	0.24
RPL11	0.24
RPL28	0.24
SELE	0.24
SNAI1	0.24
TACR1	0.24
TFE3	0.24
BEST1	0.24
XG	0.24
METTL24	0.24
GTPBP6	0.24
[truncated: 18,436 more rows]

## Sheet: GBM
TNFRSF4	0.86
DCLK3	0.85
PLXDC1	0.85
PDGFRB	0.83
CLEC11A	0.83
CLEC1A	0.81
XPNPEP2	0.8
SOX17	0.8
ITIH5	0.79
TNFAIP8L1	0.79
ABCA9	0.78
C1QTNF9	0.78
CDC42EP5	0.78
FABP4	0.77
FMO1	0.77
IGFBP4	0.77
SULT1E1	0.77
TNNT3	0.77
CERS3	0.77
CILP	0.77
PRG4	0.77
KERA	0.77
KLK8	0.77
DCSTAMP	0.77
PRAC1	0.77
SCARA5	0.77
KRTAP10-1	0.77
TRIM43	0.77
C7	0.76
TNFRSF8	0.76
CTLA4	0.76
GCG	0.76
ADAMTS17	0.76
CYP1B1-AS1	0.76
CD248	0.76
MTUS1	0.76
APOD	0.75
ECM1	0.75
NID1	0.75
CYGB	0.75
ADH1C	0.74
COL18A1	0.74
EDN3	0.73
LAMC1	0.73
TBXA2R	0.73
UGT2B11	0.73
RERGL	0.73
COL3A1	0.72
HSPG2	0.72
LAMA4	0.72
MYH13	0.72
CMKLR1	0.71
CFH	0.71
LAMB1	0.71
PRRX2	0.71
GPR174	0.71
ANO1	0.71
LINC00961	0.71
CAPN6	0.7
FN1	0.7
MROH2B	0.7
MYO1B	0.7
OR10J3	0.7
OLFML2B	0.7
SMOC2	0.7
COL4A2	0.69
MMP10	0.69
SUPT20HL2	0.69
HAR1B	0.69
MXRA5	0.69
C1QTNF9B	0.69
COL6A3	0.68
FZD2	0.68
SMTN	0.68
FAM163A	0.68
CDH17	0.67
LOXL2	0.67
DCAF12L2	0.67
MMRN2	0.67
FCRL6	0.67
ARHGEF15	0.67
STARD13	0.67
ADGRA2	0.67
LAMA2	0.66
MMP1	0.66
B3GNT8	0.66
TNMD	0.66
TMEM92	0.66
CYP1B1	0.65
DLX3	0.65
MEOX1	0.65
PXDN	0.65
STARD8	0.65
H19	0.65
LINC01091	0.65
ABCA6	0.65
TMEM30B	0.65
WNK4	0.65
CYTH3	0.64
EMILIN1	0.64
TMEM204	0.64
NKD2	0.64
BGN	0.63
KDR	0.63
ST3GAL1	0.63
FZD1	0.63
PAPSS2	0.63
DIRC1	0.63
CXCR5	0.62
BMP1	0.62
ZNF185	0.62
FGF18	0.62
KIAA1210	0.62
BNC1	0.61
FGL1	0.61
C1QTNF6	0.61
A4GALT	0.61
TSHZ3	0.61
GIPC3	0.61
ALDH1A3	0.6
COL4A1	0.6
GATA4	0.6
GIP	0.6
TNS4	0.6
ADGRF5	0.6
CD1D	0.59
DCN	0.59
ERG	0.59
MYO1D	0.59
SNAI2	0.59
ECEL1	0.59
CXORF36	0.59
PCDH12	0.59
DLL4	0.59
CDH19	0.59
EDARADD	0.59
ADCY4	0.58
HIC1	0.58
ZNF467	0.58
SH2D2A	0.58
ADAMTS4	0.58
PPM1F	0.58
LRRC3	0.58
WIPI1	0.58
FLJ44635	0.58
FAM101B	0.58
COL1A1	0.57
COL5A2	0.57
LRRC32	0.57
GPR4	0.57
JUP	0.57
KRT12	0.57
PTGER4	0.57
VWF	0.57
HOXB13	0.57
TMEM173	0.57
COL5A3	0.57
IRX4	0.57
BCL6B	0.57
ISLR	0.56
MYO1C	0.56
CCL14	0.56
HGSNAT	0.56
FAM9B	0.56
SCARF1	0.56
ZBTB46	0.56
ABCA10	0.56
ADAMTS7	0.56
GLT8D2	0.56
RASIP1	0.56
SIGLEC17P	0.56
TNFRSF13B	0.56
KIAA1462	0.56
PROSER2	0.56
TMEM88	0.56
ZNF280A	0.56
CRABP2	0.55
GJA5	0.55
PDGFRL	0.55
PZP	0.55
RCVRN	0.55
UACA	0.55
N4BP3	0.55
OLFML3	0.55
GLCE	0.55
SPATA41	0.55
ENG	0.54
LINC00029	0.54
MEOX2	0.54
SFRP1	0.54
TNNT1	0.54
ADAM12	0.54
NCK2	0.54
TBX4	0.54
PLBD1	0.54
FAM109B	0.54
FGD5	0.54
TBC1D2B	0.54
ESAM	0.54
SNED1	0.54
FLI1	0.53
IL3RA	0.53
ITGA1	0.53
PECAM1	0.53
RBMY1A1	0.53
VDR	0.53
SH3PXD2A	0.53
GRAP	0.53
COLGALT1	0.53
CRISPLD2	0.53
ROBO4	0.53
FAM20A	0.53
KANK2	0.53
TES	0.53
CARD10	0.53
CLEC14A	0.53
ADGRL4	0.53
COL1A2	0.52
DLX4	0.52
F2RL2	0.52
FBN2	0.52
FGFR1	0.52
LASP1	0.52
MMP14	0.52
RELN	0.52
MUM1L1	0.52
ITGA10	0.52
FAM110D	0.52
MYCT1	0.52
FAM129A	0.52
UBASH3B	0.52
TMEM2	0.52
ITPRIPL2	0.52
MMP25	0.52
ATP2A3	0.51
BDKRB1	0.51
LSP1	0.51
LUM	0.51
NOTCH3	0.51
PPP2R4	0.51
PRKCH	0.51
WIPF1	0.51
R3HDML	0.51
TRIL	0.51
DLC1	0.51
OLFML1	0.51
ANKH	0.51
SLC16A12	0.51
BFSP1	0.5
ACE	0.5
NOS3	0.5
VLDLR	0.5
ADAMTS2	0.5
CCM2L	0.5
SH2D3C	0.5
RFX8	0.5
GDPD5	0.5
GINS4	0.5
PCNX	0.5
OAF	0.5
ADGRF2	0.5
SERPINH1	0.49
DUSP6	0.49
EFNB1	0.49
ENPEP	0.49
SERPINF1	0.49
ST3GAL2	0.49
SPON2	0.49
PLK2	0.49
HAPLN3	0.49
ADGRD1	0.49
KIRREL	0.49
SUPT20HL1	0.49
SEPT6	0.49
PLSCR3	0.49
FREM1	0.49
POM121L2	0.49
STRA6	0.49
PLEKHH2	0.49
COL6A6	0.48
CCR7	0.48
COL15A1	0.48
ETS1	0.48
FLT1	0.48
ITGA5	0.48
PDGFB	0.48
RBMS2	0.48
ZAP70	0.48
TRAM2	0.48
FZD10	0.48
FKBP9	0.48
TOP1MT	0.48
GPBAR1	0.48
CNTN4	0.48
EXOC3L1	0.48
CD93	0.48
RRS1	0.48
HECW2	0.48
BOC	0.48
LIX1L	0.48
ADORA2A	0.47
FOXL2	0.47
CDH5	0.47
CDKN2B	0.47
F2R	0.47
GFRA1	0.47
HOXB9	0.47
ICAM2	0.47
SLC16A13	0.47
NOTCH4	0.47
PABPC3	0.47
PDC	0.47
ATP8B1	0.47
PTPRCAP	0.47
PVRL2	0.47
RBMS1	0.47
TIE1	0.47
S1PR4	0.47
FCMR	0.47
SPRY1	0.47
ACSM4	0.47
EGFL7	0.47
HDAC7	0.47
ECSCR	0.47
CRACR2A	0.47
RIMBP3	0.47
CHSY1	0.47
PLXND1	0.47
TRPV4	0.47
ACVR1	0.46
VSTM4	0.46
CDH11	0.46
DOCK1	0.46
ETV4	0.46
FUT1	0.46
GJA4	0.46
HLX	0.46
FLJ23867	0.46
IMPDH1	0.46
NPPC	0.46
RARG	0.46
TGFB3	0.46
LOC401463	0.46
RGS5	0.46
IL27RA	0.46
SPAG6	0.46
NMUR1	0.46
LAMC3	0.46
EDEM3	0.46
PTRF	0.46
SSC5D	0.46
PRR5	0.46
CPXM1	0.46
AWAT2	0.46
ADCY3	0.45
EDNRA	0.45
GGT5	0.45
HRC	0.45
PCOLCE	0.45
QSOX1	0.45
RRBP1	0.45
TRPS1	0.45
PDE5A	0.45
KLHL38	0.45
SPRY4	0.45
SOX7	0.45
L3MBTL3	0.45
RIMBP3C	0.45
BTBD3	0.45
UNC5B	0.45
BMF	0.45
CHMP7	0.45
SHE	0.45
TGS1	0.45
TINAGL1	0.45
EBF2	0.45
CREB3L2	0.45
FAM43A	0.44
BDKRB2	0.44
ENTPD1	0.44
CR2	0.44
CTSK	0.44
EXT1	0.44
PTGIR	0.44
RNASEL	0.44
SLC9A1	0.44
STK3	0.44
TCN2	0.44
XDH	0.44
SOAT2	0.44
FAM124B	0.44
CYYR1	0.44
TM4SF18	0.44
CALHM2	0.44
RBPMS2	0.44
OR8D1	0.44
NID2	0.44
RHOBTB2	0.44
EXOC3L2	0.44
PDE7B	0.44
PDLIM2	0.44
ADA	0.43
BPI	0.43
COL5A1	0.43
NR5A2	0.43
IFI16	0.43
IL2RB	0.43
PDX1	0.43
ITGB1	0.43
JAG2	0.43
KRT18	0.43
SMAD3	0.43
MCAM	0.43
CCL5	0.43
SLC16A2	0.43
NR2F2	0.43
TIMP2	0.43
TRPA1	0.43
TBX18	0.43
TRIB1	0.43
RAMP2	0.43
PRSS16	0.43
CLEC10A	0.43
RBPMS	0.43
LZTS1	0.43
STEAP4	0.43
CPED1	0.43
TXNDC5	0.43
C8ORF58	0.43
FKBP7	0.43
PCDH18	0.43
ADGRL2	0.43
PABPC1	0.43
SYTL5	0.43
FHOD1	0.43
BMS1P20	0.43
COL6A2	0.42
ELK3	0.42
PTGIS	0.42
PTPRH	0.42
TUSC3	0.42
FZD4	0.42
PABPC4	0.42
TP53I11	0.42
SH2B3	0.42
PIAS3	0.42
B3GNT2	0.42
AKAP13	0.42
COLEC11	0.42
KCTD12	0.42
PLVAP	0.42
TMEM255B	0.42
TMEM214	0.42
HEATR1	0.42
TMEM176A	0.42
BIN3	0.42
RGL1	0.42
FLRT2	0.42
MYADM	0.42
CD79A	0.41
CETP	0.41
CCR4	0.41
COL6A1	0.41
C4ORF32	0.41
FBN1	0.41
MAB21L1	0.41
MYH9	0.41
PRKAR1A	0.41
SMARCA2	0.41
GPAT4	0.41
WRN	0.41
MPZL1	0.41
GRAP2	0.41
SEC24D	0.41
NR1H3	0.41
LRFN5	0.41
EMCN	0.41
FAM167B	0.41
TMEM87B	0.41
SLC38A11	0.41
SOX18	0.41
FBLIM1	0.41
ZSCAN2	0.41
LXN	0.41
ATP11C	0.41
HTR7P1	0.41
GRASP	0.41
BCORL1	0.41
PRDM1	0.4
EPHB4	0.4
FOXC1	0.4
FLT3	0.4
MEF2D	0.4
PTPRG	0.4
RALB	0.4
RARRES2	0.4
ADAM32	0.4
TBX2	0.4
THBS2	0.4
TULP1	0.4
VASP	0.4
SLC9A3R2	0.4
SLC36A1	0.4
ARPC1B	0.4
LINC00426	0.4
WDR86	0.4
SLC35C1	0.4
MCTP2	0.4
RBFOX2	0.4
YTHDF3	0.4
DOCK6	0.4
MESDC1	0.4
HEYL	0.4
MTDH	0.4
OR14C36	0.4
LRP12	0.4
EHD2	0.4
ARHGAP6	0.39
CD3E	0.39
CD8B	0.39
CYP7A1	0.39
DOK1	0.39
HSD11B1	0.39
HTR1F	0.39
CXCL10	0.39
LRP1	0.39
MAP3K3	0.39
MGP	0.39
CXCL12	0.39
SHC1	0.39
SVIL	0.39
NSMAF	0.39
TEAD2	0.39
MARCO	0.39
AMMECR1	0.39
CLEC2B	0.39
MPZL2	0.39
P3H4	0.39
CKAP4	0.39
ATF7IP2	0.39
PEAR1	0.39
EVA1A	0.39
SLC37A3	0.39
COL25A1	0.39
SIRPG	0.39
INTS8	0.39
EOGT	0.39
TNS2	0.39
AMOTL1	0.39
RNF152	0.39
ANO2	0.39
RCN3	0.39
OR2M4	0.39
ERICH1	0.39
DIEXF	0.39
P2RY10	0.39
WTIP	0.39
ADGRE2	0.39
PLEKHG2	0.39
DENND2C	0.39
ANGPT2	0.38
CDA	0.38
FOXF2	0.38
GRK5	0.38
ITGA4	0.38
ROR2	0.38
RAB3IL1	0.38
SLC43A1	0.38
CST7	0.38
GAB3	0.38
INPP4B	0.38
S1PR2	0.38
KIAA0196	0.38
CDC42EP2	0.38
ARFGEF1	0.38
POP1	0.38
TRIOBP	0.38
STARD5	0.38
GIMAP6	0.38
TSPAN11	0.38
CTHRC1	0.38
ZNF526	0.38
HMCN1	0.38
KCTD10	0.38
HGH1	0.38
FKBP11	0.38
NCOR1P1	0.38
MAK16	0.38
CCDC117	0.38
LBX2-AS1	0.38
P4HA3	0.38
PELO	0.38
NHLRC4	0.38
KIAA1551	0.38
FRMD4A	0.38
IARS2	0.38
TRERF1	0.38
ADAMTSL3	0.38
FRMD6	0.38
KLK13	0.38
NAAA	0.38
SHISA2	0.38
SH3KBP1	0.38
FAM3D	0.37
AQP3	0.37
ART3	0.37
ASGR2	0.37
CACNB3	0.37
GTF2E2	0.37
GZMH	0.37
LCK	0.37
SDCBP	0.37
TPM4	0.37
DCHS1	0.37
DOCK11	0.37
TNFRSF10B	0.37
GIT2	0.37
TBC1D4	0.37
TRIM38	0.37
CXCR6	0.37
MAGED2	0.37
ESM1	0.37
RNF24	0.37
RAB43	0.37
KDELC1	0.37
SLC52A2	0.37
ZFHX4	0.37
HPS6	0.37
ZNF618	0.37
HSPA12B	0.37
UTP23	0.37
SYDE1	0.37
IGSF10	0.37
LMOD3	0.37
SPIDR	0.37
TRIM15	0.37
POU2F3	0.37
ZDHHC5	0.37
UTP20	0.37
CCDC102A	0.37
TMEM44	0.37
LENG9	0.37
TNN	0.37
ACTN4	0.36
BMPR2	0.36
POLR3D	0.36
EPS8	0.36
GZMM	0.36
IGFBP6	0.36
INSRR	0.36
LY6E	0.36
MME	0.36
MTR	0.36
PPP1CC	0.36
SIPA1	0.36
TNS1	0.36
TRPC6	0.36
VCL	0.36
ZNF705D	0.36
CDC42BPA	0.36
AOC3	0.36
ITM2A	0.36
BMS1	0.36
RHOBTB1	0.36
SEC23A	0.36
UTP14A	0.36
WWP1	0.36
ASB12	0.36
SLC35E4	0.36
ANKRD33	0.36
EIF2AK4	0.36
SPATA8	0.36
HSP90B3P	0.36
NOX4	0.36
ARHGAP24	0.36
GRWD1	0.36
PALM2-AKAP2	0.36
TNKS1BP1	0.36
TBC1D8B	0.36
TMEM260	0.36
FKBP14	0.36
LRRC59	0.36
PLAC9	0.36
UBE2Q1	0.36
NLRP1	0.36
NAP1L6	0.36
GIMAP8	0.36
FSTL5	0.36
UGGT1	0.36
RHOJ	0.36
SIPA1L2	0.36
GRAMD1A	0.36
VPS13B	0.36
KANK3	0.36
SWSAP1	0.36
ALDH16A1	0.36
FKBP10	0.36
SNHG17	0.36
DEPTOR	0.36
ANPEP	0.35
BMP5	0.35
CD27	0.35
COL16A1	0.35
EFNA4	0.35
ETV6	0.35
IGFBP5	0.35
LGALS8	0.35
MAN2B1	0.35
NDUFS2	0.35
NPAS2	0.35
VIT	0.35
PRKG1	0.35
RAB2A	0.35
RPS20	0.35
SSBP4	0.35
STAT6	0.35
TEAD3	0.35
TPD52L2	0.35
TSTA3	0.35
FAM155A	0.35
LUZP1	0.35
TCL1A	0.35
NUMB	0.35
MBTPS1	0.35
SLC5A6	0.35
PLOD3	0.35
MRC2	0.35
ARPC2	0.35
P3H3	0.35
TSPAN9	0.35
KDELR2	0.35
FSTL1	0.35
OR51E1	0.35
RGAG4	0.35
REEP4	0.35
AARD	0.35
COLEC12	0.35
NOSTRIN	0.35
USHBP1	0.35
LRG1	0.35
PYHIN1	0.35
MYLK2	0.35
BNC2	0.35
SEMA4C	0.35
PRR34	0.35
MMRN1	0.35
DOK4	0.35
SRGAP2	0.35
IL17RA	0.35
NAV1	0.35
NCKAP5L	0.35
DPP9	0.35
PRKD2	0.35
KLHL20	0.35
SERTAD3	0.35
NRBP1	0.35
AGMO	0.35
SLC25A6	0.34
NLRC3	0.34
CACNA1C	0.34
CD34	0.34
CSPG4	0.34
DGKA	0.34
PRRC1	0.34
GZMK	0.34
IL4R	0.34
ZNF366	0.34
LY9	0.34
MFAP3	0.34
MFGE8	0.34
GIMAP7	0.34
KLF14	0.34
PREP	0.34
PRKDC	0.34
OLFML2A	0.34
TAF2	0.34
TGFB1	0.34
TGFBR2	0.34
TIMP3	0.34
HSP90B1	0.34
WT1	0.34
DOC2B	0.34
CBLN4	0.34
RNF144A	0.34
BCL2L11	0.34
PROCR	0.34
LINC00704	0.34
PTP4A3	0.34
SEC23IP	0.34
WDR26	0.34
CD276	0.34
LBH	0.34
TSPAN14	0.34
SMARCAL1	0.34
ASAP1	0.34
NRIP2	0.34
UBR5	0.34
LRRC8C	0.34
COX4I2	0.34
SLC22A16	0.34
SLC38A2	0.34
SWT1	0.34
FAM102B	0.34
LOC284798	0.34
VASH1	0.34
PARVA	0.34
TMEM26	0.34
ZC3H3	0.34
SH3PXD2B	0.34
BARHL1	0.34
FAM20C	0.34
PCDH19	0.34
FAM26E	0.34
FAM160B1	0.34
CREB3L1	0.34
SCARF2	0.34
PKDCC	0.34
KIAA1429	0.34
ZNF792	0.34
HTRA3	0.34
FOXQ1	0.34
XYLT2	0.34
P3H1	0.34
ACBD3	0.34
RAPH1	0.34
MTERF4	0.34
ADRB3	0.33
ARF6	0.33
RUNX1	0.33
CD247	0.33
CD8A	0.33
CPT1A	0.33
FAP	0.33
FKBP1A	0.33
EMB	0.33
PPARGC1B	0.33
GMDS	0.33
GPER1	0.33
SPRED2	0.33
NFYA	0.33
PMM2	0.33
MAP2K3	0.33
PTPN9	0.33
RAC2	0.33
RGS3	0.33
SMARCD2	0.33
TLE2	0.33
TPM3	0.33
FAM174B	0.33
DYSF	0.33
HYAL2	0.33
CYP7B1	0.33
LPGAT1	0.33
SH2D3A	0.33
ACTR2	0.33
SORBS3	0.33
MPHOSPH10	0.33
LRRC17	0.33
SPRY2	0.33
MYBBP1A	0.33
IVNS1ABP	0.33
POSTN	0.33
RAB35	0.33
CDC42EP1	0.33
AKAP2	0.33
PRR4	0.33
ALG12	0.33
FAM109A	0.33
GLMP	0.33
WWC2	0.33
BICC1	0.33
ARMC9	0.33
SLC25A32	0.33
SLC35B3	0.33
C1ORF64	0.33
MBTPS2	0.33
LOXL4	0.33
HIGD1B	0.33
FNDC1	0.33
PUS7	0.33
LRRC36	0.33
ARHGEF40	0.33
CSGALNACT1	0.33
LINC00636	0.33
PHLDB1	0.33
PRND	0.33
C15ORF39	0.33
ATP8B2	0.33
ATP10D	0.33
CMTM3	0.33
TSKS	0.33
SNX33	0.33
BLOC1S3	0.33
FMO6P	0.33
C1ORF131	0.33
POPDC2	0.33
DNAH10	0.33
ASGR1	0.32
ZFHX3	0.32
BAK1	0.32
CDR2	0.32
DPEP1	0.32
FHL3	0.32
GPX8	0.32
HNF4G	0.32
AFAP1L1	0.32
INSR	0.32
KLRB1	0.32
MAGEA12	0.32
MYD88	0.32
MYH10	0.32
SERPINE2	0.32
SERPINB9	0.32
PKNOX1	0.32
PTGFRN	0.32
PTH1R	0.32
RAB13	0.32
SLC20A1	0.32
XBP1	0.32
FOXL2NB	0.32
DYRK2	0.32
CUL4B	0.32
PPFIBP1	0.32
NDST2	0.32
BECN1	0.32
PHACTR2	0.32
CARM1	0.32
CAMKK2	0.32
RAI1	0.32
KDELR1	0.32
TMEM119	0.32
C7ORF26	0.32
TMEM109	0.32
TTPAL	0.32
KIF7	0.32
RABEP2	0.32
KLHL29	0.32
SLAMF6	0.32
AMMECR1L	0.32
TM2D2	0.32
MRPL35	0.32
EIF3L	0.32
SUFU	0.32
LTV1	0.32
TRPM4	0.32
DCHS2	0.32
CHTF8	0.32
EVA1B	0.32
MIS18BP1	0.32
RPIA	0.32
TSR1	0.32
WWC3	0.32
EFR3A	0.32
SMG6	0.32
PIP5K1C	0.32
TMEM131	0.32
LEMD3	0.32
SH3BP1	0.32
PLD3	0.32
PLXNB2	0.32
PITPNB	0.32
FABP9	0.32
NCLN	0.32
ENTPD7	0.32
EMBP1	0.32
FAM162B	0.32
PRR12	0.32
ESYT2	0.32
DHX37	0.32
PRX	0.32
SAMM50	0.32
LOC91450	0.32
AAR2	0.32
WDR81	0.32
MAP3K14-AS1	0.32
C2CD4B	0.32
LOC100133669	0.32
RP1L1	0.32
LGALSL	0.32
GPR171	0.32
C20ORF85	0.32
GALNT11	0.32
ERICH4	0.32
LMBR1	0.32
FAM160B2	0.32
UBE2Z	0.32
ASIC2	0.31
ANXA11	0.31
ARF1	0.31
MLKL	0.31
CD2	0.31
CD19	0.31
CD40	0.31
CCR8	0.31
PABPC4L	0.31
CSK	0.31
EBF1	0.31
ELF4	0.31
EPHA1	0.31
FGD1	0.31
CXCR3	0.31
ICAM3	0.31
KCNQ1	0.31
LMO7	0.31
MYH4	0.31
NAB2	0.31
FURIN	0.31
PDE8A	0.31
PFN1	0.31
PPIB	0.31
PVR	0.31
RECQL	0.31
TRIM27	0.31
RFX1	0.31
RP1	0.31
RPS6KA3	0.31
SEL1L	0.31
SSR1	0.31
SSR2	0.31
STK10	0.31
TCF4	0.31
TEK	0.31
PPP1R18	0.31
CARMN	0.31
KLF11	0.31
DGAT1	0.31
ADAM6	0.31
CACNA1G	0.31
ASH2L	0.31
TRIP10	0.31
PPIAL4E	0.31
KCNK6	0.31
H6PD	0.31
SLK	0.31
PTDSS1	0.31
GJC1	0.31
SPRY3	0.31
SEMA6B	0.31
KDM5B	0.31
LYVE1	0.31
RNASE10	0.31
LINC01140	0.31
CRELD2	0.31
ARHGAP10	0.31
OR2A9P	0.31
AGRN	0.31
SLC2A10	0.31
DACT3	0.31
B3GALNT2	0.31
MTX3	0.31
PHF20L1	0.31
METTL13	0.31
TMEM185A	0.31
ZNF503	0.31
ITPRIP	0.31
ACSM2B	0.31
TMEM39B	0.31
ELP3	0.31
NCBP3	0.31
TMEM127	0.31
SEPHS2	0.31
LMBR1L	0.31
SAMD3	0.31
DCAF6	0.31
UNC45A	0.31
KIAA0922	0.31
DOCK9	0.31
ANGPTL2	0.31
CBX6	0.31
PHTF2	0.31
ZBTB2	0.31
TCEAL8	0.31
RASGRP3	0.31
GORASP2	0.31
SLC38A10	0.31
RCSD1	0.31
SND1	0.31
MTBP	0.31
SULT1B1	0.31
TAS2R40	0.31
TIMM22	0.31
TSHZ2	0.31
NUDT19	0.31
SNX16	0.31
TMEM168	0.31
PARP4	0.3
APP	0.3
ARNT	0.3
BAX	0.3
BNIP2	0.3
CALD1	0.3
LIMS3-LOC440895	0.3
CD3D	0.3
CHD3	0.3
CLCN5	0.3
CSNK1G2	0.3
VCAN	0.3
EPHB3	0.3
MECOM	0.3
FOXS1	0.3
IDE	0.3
IREB2	0.3
LIMK1	0.3
LTK	0.3
TM4SF1	0.3
SMAD6	0.3
MEST	0.3
MGAT2	0.3
NUCB1	0.3
P2RX4	0.3
PCM1	0.3
PDK4	0.3
COL22A1	0.3
PLXNA1	0.3
PRKACA	0.3
PTPRB	0.3
RAG1	0.3
RPL4	0.3
RREB1	0.3
VPS37A	0.3
STAT5A	0.3
TBX3	0.3
TGFB1I1	0.3
PDIA3P1	0.3
ST8SIA4	0.3
FZD8	0.3
CCR2	0.3
FCN3	0.3
SKAP1	0.3
B4GALT3	0.3
SRRD	0.3
ALDH1A2	0.3
RPS6KA4	0.3
DDX21	0.3
MSC	0.3
MAPKAPK2	0.3
WDR46	0.3
FHL5	0.3
SOCS5	0.3
UBE3C	0.3
EDEM1	0.3
TENM1	0.3
SF3B4	0.3
CFHR3	0.3
CLP1	0.3
ECD	0.3
FCRL2	0.3
LRRK1	0.3
IPO4	0.3
CLMN	0.3
NRROS	0.3
PIK3R6	0.3
TRIM11	0.3
NDEL1	0.3
ISG20L2	0.3
PCMTD1	0.3
CLDN20	0.3
TAS2R1	0.3
STMN3	0.3
RRP15	0.3
MIXL1	0.3
LEF1	0.3
HOOK3	0.3
PPP1R9B	0.3
ANTXR2	0.3
RASSF3	0.3
BET1P1	0.3
DNAJC10	0.3
SH3TC1	0.3
L1TD1	0.3
GPATCH4	0.3
LOC284441	0.3
SOBP	0.3
CCDC186	0.3
CCDC25	0.3
PPP6R1	0.3
MORC2	0.3
BTBD7	0.3
SEPT11	0.3
INTS9	0.3
FOXJ2	0.3
LRCH1	0.3
MPRIP	0.3
TTLL12	0.3
ATP11B	0.3
TDRD1	0.3
HAAO	0.3
PPAN	0.3
TM9SF3	0.3
TFIP11	0.3
ATXN7L3	0.3
RIC1	0.3
RRN3P3	0.3
TLDC1	0.3
MCU	0.3
VWDE	0.3
NTAN1	0.3
ARIH1	0.3
SESTD1	0.3
LOC100130872	0.3
LHX6	0.3
CSAG1	0.3
MYL10	0.3
SLC43A3	0.3
TFB2M	0.3
COPS7B	0.3
ZNF574	0.3
ARID2	0.3
AP2A1	0.29
AACS	0.29
ATP7A	0.29
CASP10	0.29
CD6	0.29
CLTC	0.29
CNN2	0.29
COL12A1	0.29
CS	0.29
CYB5R3	0.29
DIAPH2	0.29
ELK1	0.29
EPAS1	0.29
NR2F6	0.29
FCGRT	0.29
FLT4	0.29
EGFLAM	0.29
PDIA3	0.29
HDLBP	0.29
IFNAR2	0.29
ITGA9	0.29
LRP5	0.29
BCAM	0.29
MMP9	0.29
PPP1R12A	0.29
STT3B	0.29
ORC2	0.29
P4HB	0.29
CFP	0.29
PKD2	0.29
LHX8	0.29
ALDH18A1	0.29
RAB1A	0.29
MAP4K2	0.29
ST3GAL4	0.29
SP3	0.29
STAT3	0.29
TDG	0.29
TERF1	0.29
CARNMT1	0.29
TOP1P1	0.29
TPR	0.29
UBTF	0.29
YWHAZ	0.29
SLC39A7	0.29
KAT6A	0.29
NCOA3	0.29
FIGNL2	0.29
RAD51AP2	0.29
TNFRSF10D	0.29
SCAF11	0.29
ARHGEF2	0.29
TRIP12	0.29
ASB9	0.29
EIF2AK3	0.29
ENTPD4	0.29
MTFR1	0.29
GOLGA5	0.29
DNAJB6	0.29
TSPAN5	0.29
FARP1	0.29
CRTAP	0.29
SLC27A3	0.29
KDELR3	0.29
KDELC2	0.29
DSCC1	0.29
MIA3	0.29
PREX2	0.29
CHST14	0.29
ADAMTS12	0.29
FCRL1	0.29
CCM2	0.29
RIOK1	0.29
VPS36	0.29
DACT1	0.29
ANTXR1	0.29
SNX9	0.29
UBE2J1	0.29
NUDCD1	0.29
MFSD5	0.29
FAM225B	0.29
MIER2	0.29
PPP1R12C	0.29
RNF111	0.29
WBP1L	0.29
IMPAD1	0.29
DUSP23	0.29
HEATR3	0.29
SHQ1	0.29
NBPF15	0.29
FRG1BP	0.29
MSX2P1	0.29
COPG1	0.29
KIF16B	0.29
ZBTB1	0.29
SBNO2	0.29
ZFP64	0.29
TRIM35	0.29
IKBIP	0.29
TTC28	0.29
ZNF281	0.29
ERO1B	0.29
C11ORF16	0.29
CDC42SE1	0.29
SMAGP	0.29
SHROOM4	0.29
CCDC97	0.29
LEO1	0.29
CCAR2	0.29
NBPF10	0.29
CDYL2	0.29
SGK223	0.29
CANT1	0.29
PLEKHA2	0.29
SERHL	0.29
EHD4	0.29
RGPD3	0.29
SH2D4A	0.29
TNS3	0.29
ARMCX5	0.29
DCP1B	0.29
ADORA2B	0.28
ANK1	0.28
BLMH	0.28
C3AR1	0.28
RUNX3	0.28
CD28	0.28
CDC27	0.28
CLIC2	0.28
COX10	0.28
DSG2	0.28
ECH1	0.28
ERCC2	0.28
FBL	0.28
FOXC2	0.28
FLG	0.28
GABRD	0.28
GDF10	0.28
GNAS	0.28
KCNK2	0.28
AFF3	0.28
PENK	0.28
SLC25A3	0.28
PHKA2	0.28
PLCB3	0.28
PTPRM	0.28
PXN	0.28
RAB27A	0.28
RARA	0.28
RPL6	0.28
SLC12A2	0.28
FSCN1	0.28
SNTB2	0.28
SP1	0.28
TCF20	0.28
TSPAN4	0.28
CLDN5	0.28
TNFAIP6	0.28
TOP1	0.28
UTRN	0.28
PCGF2	0.28
KMT2D	0.28
TRRAP	0.28
RECK	0.28
EIF3A	0.28
EIF3D	0.28
GPAA1	0.28
TNFRSF6B	0.28
TNFRSF10A	0.28
MCM3AP	0.28
ARHGEF1	0.28
LARGE	0.28
TRIP11	0.28
TRIP4	0.28
TM9SF2	0.28
TRANK1	0.28
RBM8A	0.28
NAALADL1	0.28
CD96	0.28
SYNCRIP	0.28
TACC2	0.28
POLR3C	0.28
SLC12A7	0.28
WDR4	0.28
PDE10A	0.28
CDC37	0.28
DERL1	0.28
ZNF343	0.28
TBC1D10C	0.28
FAM65A	0.28
EGLN2	0.28
USB1	0.28
SMC6	0.28
PRKCDBP	0.28
ISOC2	0.28
CLMP	0.28
PUS1	0.28
SH3BP5L	0.28
SHARPIN	0.28
RC3H1	0.28
GUCD1	0.28
CCDC3	0.28
YARS2	0.28
OBSCN	0.28
RNF135	0.28
FTSJ3	0.28
LOXL3	0.28
BCL9L	0.28
RTN4RL2	0.28
DNAJB12	0.28
ZNF280D	0.28
FBXL12	0.28
RPP25	0.28
DNAJC17	0.28
TMEM39A	0.28
GIMAP5	0.28
DLGAP4	0.28
ZNF507	0.28
LRRC70	0.28
THSD1	0.28
TBC1D9	0.28
PRRC2C	0.28
FBXO28	0.28
PPP1R13B	0.28
TRAM1	0.28
SERTAD4	0.28
ANP32C	0.28
KCNE4	0.28
SEMA3G	0.28
WNT3A	0.28
ATP13A1	0.28
SLC39A10	0.28
ANKRD50	0.28
ZNF624	0.28
WDFY1	0.28
COX19	0.28
R3HDM4	0.28
HECTD1	0.28
SETBP1	0.28
CCDC9	0.28
TCTN3	0.28
NLRP12	0.28
LATS2	0.28
OPLAH	0.28
MLH3	0.28
DKKL1	0.28
SLC38A5	0.28
TNFRSF21	0.28
YPEL2	0.28
PIGS	0.28
TMEM176B	0.28
CCDC60	0.28
SENP1	0.28
GLTSCR1	0.28
ZNF831	0.28
SPRED1	0.28
MFSD6L	0.28
TMED7-TICAM2	0.28
DUS1L	0.28
CRTC3	0.28
MARCH7	0.28
ATRX	0.27
BMP6	0.27
BTG1	0.27
CAD	0.27
CASP2	0.27
CDC6	0.27
CTSE	0.27
DIO2	0.27
DUSP7	0.27
ELF1	0.27
EP300	0.27
FAH	0.27
FAT1	0.27
FBLN2	0.27
FES	0.27
HAS2	0.27
ADM5	0.27
HSD3B2	0.27
WDR36	0.27
IL10RB	0.27
STT3A	0.27
JAK3	0.27
KCNJ2	0.27
KRT8	0.27
LRP3	0.27
MCL1	0.27
HNRNPM	0.27
NF2	0.27
NFATC4	0.27
NKG7	0.27
NODAL	0.27
CNOT3	0.27
PGF	0.27
POLG	0.27
PWP2	0.27
RAB5C	0.27
RPL10	0.27
RPN2	0.27
R3HCC1	0.27
GIMAP1	0.27
SSTR4	0.27
TBL1X	0.27
TEAD4	0.27
TCHH	0.27
TLL1	0.27
UBE2G1	0.27
XPNPEP1	0.27
YES1	0.27
SLC30A4	0.27
ZYX	0.27
MOGS	0.27
ZNF286B	0.27
ATRN	0.27
RRP1	0.27
VAMP4	0.27
ADAM19	0.27
F2RL3	0.27
DOK2	0.27
SLC7A6	0.27
NEMF	0.27
LRRFIP1	0.27
ASB7	0.27
ARHGAP29	0.27
MED23	0.27
ROCK2	0.27
GOSR2	0.27
NOL4L	0.27
IKBKE	0.27
ADAMTSL2	0.27
MLEC	0.27
JOSD1	0.27
ARHGAP25	0.27
SLC25A13	0.27
LHFP	0.27
PSME3	0.27
STX6	0.27
HMG20A	0.27
TOMM40	0.27
ENOX2	0.27
COLEC10	0.27
CORIN	0.27
NUP50	0.27
PAPOLA	0.27
SOX30	0.27
PTENP1	0.27
PROSC	0.27
FAM45A	0.27
ARHGAP42	0.27
MMP28	0.27
ARMT1	0.27
FAT4	0.27
C22ORF29	0.27
ZNF669	0.27
SLC8B1	0.27
KDM7A	0.27
DTX2	0.27
HM13	0.27
TRMT1L	0.27
RNF170	0.27
FAM210B	0.27
ITSN2	0.27
BCL2L12	0.27
C19ORF12	0.27
FRMD8	0.27
ASCC2	0.27
VPS54	0.27
LZTS2	0.27
ZC3H8	0.27
TNRC18	0.27
FBXO18	0.27
MSL3P1	0.27
SLC46A3	0.27
ZNF283	0.27
CLN6	0.27
SLC38A7	0.27
CHST12	0.27
FAM45BP	0.27
HDAC8	0.27
GPRC5C	0.27
SLC50A1	0.27
ANKS1A	0.27
ESYT1	0.27
SMCHD1	0.27
RYBP	0.27
AP4E1	0.27
GPR161	0.27
ABCB10	0.27
OPN3	0.27
SMCO4	0.27
AVEN	0.27
CORO1B	0.27
SLC45A4	0.27
VPS18	0.27
MTFMT	0.27
NCOA5	0.27
LOC90784	0.27
TBC1D22A	0.27
RAB3GAP2	0.27
TMEM184B	0.27
DCAF13	0.27
EPGN	0.27
IBTK	0.27
HERC4	0.27
TRPC4AP	0.27
IRF2BP1	0.27
TMEM8A	0.27
TPK1	0.27
LAT	0.27
SRPX2	0.27
FASTKD5	0.27
FAM212A	0.27
MYLIP	0.27
EPN1	0.27
SLC25A24	0.27
PHLDB3	0.27
LYPLA2P1	0.27
ZNF579	0.27
GNPNAT1	0.27
AIDA	0.27
ADCY6	0.26
ARHGDIA	0.26
ATP2A2	0.26
CALR	0.26
CD5	0.26
CHD1	0.26
AP2S1	0.26
CSTF1	0.26
DDX5	0.26
DHX9	0.26
DECR1	0.26
DLST	0.26
EGR2	0.26
EIF4B	0.26
EIF4EBP2	0.26
ERN1	0.26
FUT4	0.26
GGCX	0.26
GLI3	0.26
GLS	0.26
GNAI1	0.26
GRN	0.26
HHEX	0.26
HPGD	0.26
IGF2R	0.26
IL13RA1	0.26
ITPR3	0.26
KIFC3	0.26
LTB	0.26
MAN1A1	0.26
MGAT1	0.26
MNT	0.26
CEP112	0.26
SAMD14	0.26
MYO1E	0.26
NAGA	0.26
NFKB1	0.26
PGBD2	0.26
OSBP	0.26
OXA1L	0.26
PBX2	0.26
PCBP1	0.26
PCDH1	0.26
PDE3A	0.26
ABCB1	0.26
PPEF1	0.26
PRF1	0.26
PRKCSH	0.26
DNAJC3	0.26
QARS	0.26
RBM3	0.26
RNF2	0.26
RPL30	0.26
FAM92A1	0.26
CCL11	0.26
SRSF6	0.26
SH3GL1	0.26
SNAPC2	0.26
TCF15	0.26
TFPI	0.26
THY1	0.26
KLF10	0.26
TNFRSF1A	0.26
YWHAB	0.26
PASD1	0.26
ANP32A	0.26
LZTR1	0.26
PIP5K1A	0.26
DENR	0.26
RGPD6	0.26
EIF3B	0.26
RIPK1	0.26
PEX11B	0.26
DCAF5	0.26
HERC1	0.26
PDLIM1	0.26
AIFM1	0.26
CTDP1	0.26
MFHAS1	0.26
GTF3C3	0.26
RPH3AL	0.26
LITAF	0.26
VPS4B	0.26
PDIA4	0.26
ARMCX2	0.26
HEPH	0.26
ZBED4	0.26
RABGAP1L	0.26
FAM20B	0.26
CD302	0.26
HMGXB4	0.26
SAE1	0.26
PDCD7	0.26
RBM12	0.26
TMEM5	0.26
CNPY2	0.26
CDIPT	0.26
NES	0.26
RASSF1	0.26
FILIP1L	0.26
MYPOP	0.26
NHSL2	0.26
GALNT18	0.26
GALNT14	0.26
ARMC7	0.26
MCPH1	0.26
HAR1A	0.26
OBFC1	0.26
VCPIP1	0.26
ORAI2	0.26
ZNF436	0.26
CSRNP2	0.26
KLHL30	0.26
L3MBTL2	0.26
PI15	0.26
EXOC8	0.26
FCF1	0.26
TMEM133	0.26
PBDC1	0.26
BET1L	0.26
KLRF1	0.26
TRPV2	0.26
TMEM117	0.26
POLR3GL	0.26
ACBD6	0.26
CHMP3	0.26
PLPP5	0.26
ZAK	0.26
PARD6G	0.26
KLHL22	0.26
AJUBA	0.26
ZCCHC3	0.26
MICALL1	0.26
RBM20	0.26
C1RL-AS1	0.26
ATAD2B	0.26
LINC00922	0.26
TRPM7	0.26
WHSC1L1	0.26
GPATCH1	0.26
DARS2	0.26
LOC645166	0.26
WDR33	0.26
LAPTM4B	0.26
HSFX2	0.26
XRN2	0.26
ZNF280C	0.26
RALY	0.26
ATF6	0.26
FAR2	0.26
PAXIP1	0.26
NT5C2	0.26
PDS5B	0.26
ITFG2	0.26
PPRC1	0.26
PEG10	0.26
RCOR1	0.26
ZC3H7B	0.26
ICOSLG	0.26
PES1	0.26
CTNNBL1	0.26
RUNDC3B	0.26
PRKD3	0.26
SDF2L1	0.26
BRD1	0.26
CYP26B1	0.26
FTSJ1	0.26
CYSLTR2	0.26
CERS6	0.26
PPM1H	0.26
NUFIP2	0.26
ZNF398	0.26
TMEM181	0.26
BEGAIN	0.26
STIM2	0.26
CWC22	0.26
MARK4	0.26
ANGEL2	0.26
FMNL3	0.26
LMF2	0.26
FAM98A	0.26
LRP10	0.26
PRPF31	0.26
IDI2	0.26
DAZAP1	0.26
TBL2	0.26
RPUSD2	0.26
SLC39A1	0.26
SIT1	0.26
PGAP3	0.26
ELAC2	0.26
TBC1D31	0.26
LOC388692	0.26
OR2M3	0.26
MRPL15	0.26
XKR5	0.26
GLTSCR2	0.26
TBC1D20	0.26
GPR89A	0.26
PIEZO2	0.26
XIRP2	0.26
FAM134C	0.26
RFWD2	0.26
NOM1	0.26
ANAPC1	0.26
FNDC3B	0.26
VWA1	0.26
AP2A2	0.25
CRYBG3	0.25
TNFRSF17	0.25
C1R	0.25
RUNX1T1	0.25
CBLB	0.25
CD3G	0.25
COPA	0.25
CSNK1D	0.25
CTNS	0.25
DCTD	0.25
DHX8	0.25
DNMT3B	0.25
ARID3A	0.25
EEF2	0.25
EIF4A1	0.25
ELANE	0.25
ESRRA	0.25
EXTL3	0.25
F2RL1	0.25
ACSL4	0.25
PRICKLE2	0.25
XRCC6	0.25
GABPB1	0.25
GNG11	0.25
GNL1	0.25
GOLGA3	0.25
HNRNPA1	0.25
EIF3E	0.25
JAK1	0.25
PIKFYVE	0.25
PRICKLE3	0.25
LTBP2	0.25
MDFI	0.25
MFAP4	0.25
ATXN3	0.25
MAP3K11	0.25
MMP2	0.25
MYL4	0.25
NCL	0.25
NKX3-1	0.25
NOP2	0.25
NPTX2	0.25
NUP98	0.25
PLTP	0.25
PPIC	0.25
PSMD11	0.25
PTBP1	0.25
PTK2	0.25
PTPN12	0.25
RASA1	0.25
RPL7	0.25
RSU1	0.25
SNAI1	0.25
SNTB1	0.25
SPG7	0.25
SRPRA	0.25
SLC25A43	0.25
SUOX	0.25
TCOF1	0.25
TP53BP1	0.25
TPBG	0.25
ZNF45	0.25
DHX16	0.25
CHST1	0.25
CDK13	0.25
TNFSF12	0.25
SNAP23	0.25
PCSK7	0.25
KL	0.25
ABCG2	0.25
PHF14	0.25
N4BP1	0.25
KIAA0355	0.25
ZNF623	0.25
STK35	0.25
AREL1	0.25
AP5Z1	0.25
IQSEC1	0.25
HELZ	0.25
MED12	0.25
PDCD6IP	0.25
CPQ	0.25
STARD3	0.25
PRSS38	0.25
VWA2	0.25
KCTD15	0.25
TMEM185B	0.25
HNRNPA1L2	0.25
ZNF705A	0.25
PPP1R3B	0.25
C14ORF169	0.25
TEPP	0.25
PEAK1	0.25
MCMBP	0.25
UXS1	0.25
TTI2	0.25
ABTB1	0.25
TNKS2	0.25
TTYH3	0.25
B3GNTL1	0.25
ITFG1	0.25
FBXO38	0.25
NIPA2	0.25
VANGL1	0.25
KLKP1	0.25
RNF157	0.25
SIX5	0.25
GEMIN4	0.25
RAB34	0.25
AADAT	0.25
WBP5	0.25
KLF3	0.25
IER5	0.25
PRR16	0.25
SLA2	0.25
METTL25	0.25
PCYOX1	0.25
REV1	0.25
ISYNA1	0.25
PIAS4	0.25
HECA	0.25
EBPL	0.25
DNAJC14	0.25
SEPT10	0.25
BTBD1	0.25
XXYLT1	0.25
CPSF2	0.25
GXYLT1	0.25
GAR1	0.25
SSH1	0.25
RNF216	0.25
FAM35A	0.25
ARL15	0.25
CDRT4	0.25
WDR55	0.25
DUS2	0.25
PRMT6	0.25
MAP1S	0.25
LGI2	0.25
ANKRD34A	0.25
VPS53	0.25
ZDHHC7	0.25
BAHD1	0.25
CARD8	0.25
SLC30A6	0.25
CHFR	0.25
PDCD11	0.25
DHX32	0.25
TTC17	0.25
MON2	0.25
RNF217	0.25
DNAJC13	0.25
SUSD2	0.25
NUP62	0.25
EIF4ENIF1	0.25
SPINK8	0.25
ZNF707	0.25
DPY19L4	0.25
C14ORF28	0.25
SLC12A9	0.25
RALGAPB	0.25
BIRC6	0.25
PLEKHG1	0.25
KIAA1614	0.25
[truncated: 18,436 more rows]

## Sheet: HNSC
ENG	0.86
PECAM1	0.83
CXORF36	0.83
ARHGEF15	0.83
RHOJ	0.83
CLEC14A	0.83
A2M	0.82
ESAM	0.81
ADGRL4	0.81
APLNR	0.8
PLVAP	0.8
STARD8	0.79
CD34	0.78
CDH5	0.78
TIE1	0.78
LDB2	0.78
S1PR1	0.77
PCDH12	0.77
CD93	0.77
ZEB2	0.76
ECSCR	0.76
JAM2	0.76
VWF	0.75
GPR4	0.74
TEK	0.74
MYCT1	0.74
HSPA12B	0.74
VASH1	0.74
ZCCHC24	0.74
KCNJ8	0.73
FZD4	0.73
CCM2L	0.73
OLFML1	0.73
FGD5	0.73
ADCY4	0.72
NOVA2	0.72
EMCN	0.72
ADGRF5	0.72
SOX17	0.72
ENTPD1	0.71
GGT5	0.71
IL3RA	0.71
LAMA4	0.71
FBLN5	0.71
PLXND1	0.71
ADGRA2	0.71
AQP1	0.7
COL15A1	0.7
FMOD	0.7
GJA4	0.7
HLX	0.7
KDR	0.7
PDGFRB	0.7
ZEB1	0.7
SCARF1	0.7
DCHS1	0.7
ZNF423	0.7
KIAA1462	0.7
RASGRP3	0.7
BCL6B	0.7
ARHGAP6	0.69
ACE	0.69
ST3GAL2	0.69
USHBP1	0.69
RASL12	0.69
TNS2	0.69
DAB2	0.68
FLI1	0.68
LRRC32	0.68
PDE1B	0.68
STAB1	0.68
GIPC3	0.68
DLC1	0.67
DAAM2	0.67
ANXA6	0.66
RUNX1T1	0.66
FOLR2	0.66
GNG11	0.66
MEOX2	0.66
TNFSF12	0.66
ABCC9	0.66
ROBO4	0.66
NID2	0.66
CMKLR1	0.65
PTPRB	0.65
TGFB3	0.65
WIPF1	0.65
TMEM119	0.65
EMILIN1	0.65
DLL4	0.65
CNRIP1	0.65
PODN	0.65
FLT4	0.64
NFATC4	0.64
PDE1A	0.64
LHFP	0.64
RAMP2	0.64
ZNF385D	0.64
FAM110D	0.64
RASGRP4	0.64
MFRP	0.64
ANGPTL2	0.64
GIMAP8	0.64
ST6GALNAC3	0.64
PCDH17	0.64
EBF2	0.64
FYN	0.63
GUCY1A3	0.63
HIC1	0.63
PMP22	0.63
CXCL12	0.63
ARHGEF6	0.63
MRVI1	0.63
SPON1	0.63
BICC1	0.63
FAM198B	0.63
TMEM176A	0.63
PREX1	0.63
DDR2	0.62
RAB3IL1	0.62
C10ORF128	0.62
SOD3	0.62
TIMP2	0.62
COL14A1	0.62
RECK	0.62
RAMP3	0.62
VCAN	0.61
FBN1	0.61
FCN1	0.61
LPAR4	0.61
HNMT	0.61
LAMB2	0.61
PDGFRA	0.61
ENPP2	0.61
TCF4	0.61
CUBN	0.61
AOC3	0.61
ADAMTS2	0.61
PLXNC1	0.61
SEMA6B	0.61
OR51E1	0.61
PEAK1	0.61
CCDC102B	0.61
PLEKHO2	0.61
SH3RF3	0.61
PCDH18	0.61
ABCA6	0.61
ATP10A	0.61
ARSB	0.6
CACNA1C	0.6
RASGRF2	0.6
TLR4	0.6
TNS1	0.6
VIM	0.6
SLCO2B1	0.6
TMEM204	0.6
NRROS	0.6
GIMAP6	0.6
ADAMTS10	0.6
DHH	0.6
TM4SF18	0.6
SYT11	0.6
IGDCC4	0.6
ZNF521	0.6
KANK2	0.6
SNED1	0.6
HEYL	0.6
ADPRH	0.59
EBF1	0.59
THY1	0.59
RGS5	0.59
PKIG	0.59
ARHGAP31	0.59
STARD13	0.59
TMEM176B	0.59
TNS3	0.59
COL6A1	0.58
CTSK	0.58
F2R	0.58
IGFBP4	0.58
SEPT4	0.58
CCL14	0.58
SELP	0.58
SELPLG	0.58
TBXA2R	0.58
CLEC3B	0.58
PLPPR4	0.58
SH2D3C	0.58
ADAM33	0.58
LINC00654	0.58
FNDC1	0.58
LOXL3	0.58
MPEG1	0.58
IFFO1	0.58
GPR162	0.58
COL6A2	0.57
CSF1R	0.57
DOK1	0.57
FGF7	0.57
ZNF366	0.57
ITGA1	0.57
LAMA2	0.57
MMP2	0.57
MYO1F	0.57
SAMD14	0.57
ABCB4	0.57
PTPRM	0.57
S1PR2	0.57
ADAMTSL2	0.57
RCAN2	0.57
COLEC12	0.57
NOX4	0.57
MRAS	0.57
C16ORF45	0.57
FMNL3	0.57
NLRC4	0.57
DKK2	0.57
KANK3	0.57
AEBP1	0.56
ANK2	0.56
COL4A1	0.56
COL6A3	0.56
ENPEP	0.56
FLT1	0.56
ACKR1	0.56
PGM5	0.56
PRKG1	0.56
TBXAS1	0.56
SPARCL1	0.56
SLC7A7	0.56
CD302	0.56
PREX2	0.56
TSPAN11	0.56
APOLD1	0.56
NOSTRIN	0.56
TRPV2	0.56
NTNG2	0.56
BNC2	0.56
PIK3R5	0.56
FAM78A	0.56
THSD7A	0.56
OLFML2B	0.56
LMCD1	0.56
CD4	0.55
COL8A1	0.55
CYBB	0.55
F10	0.55
FBLN2	0.55
FCGRT	0.55
FPR1	0.55
IL10RA	0.55
MMP16	0.55
PDE3A	0.55
TNFRSF1B	0.55
DYSF	0.55
ITGA8	0.55
NRP1	0.55
CD163	0.55
ABCA9	0.55
ADAMTS7	0.55
LINC01140	0.55
NHSL2	0.55
MMRN2	0.55
LINC00924	0.55
C1QTNF7	0.55
CRISPLD2	0.55
GALNT15	0.55
TMEM255B	0.55
CD163L1	0.55
LOC100129034	0.55
FAM13C	0.55
MAN1C1	0.55
SHROOM4	0.55
EXOC3L2	0.55
LRRC25	0.55
ANPEP	0.54
BST1	0.54
C3AR1	0.54
COL3A1	0.54
FCGR2B	0.54
FPR3	0.54
GFRA2	0.54
GJA5	0.54
NCKAP1L	0.54
LAIR1	0.54
RARRES2	0.54
SFRP2	0.54
LAPTM5	0.54
ADAMTS4	0.54
RHOBTB1	0.54
KLF2	0.54
GPIHBP1	0.54
CYSLTR1	0.54
LILRB1	0.54
LILRB3	0.54
FSTL1	0.54
INMT	0.54
FILIP1L	0.54
COL18A1	0.54
GLT8D2	0.54
JAM3	0.54
DCLK3	0.54
LRRC70	0.54
OLFML3	0.54
PLXDC1	0.54
ZNF835	0.54
COL24A1	0.54
CYTH4	0.54
SIGLEC9	0.54
ZBTB47	0.54
FMNL1	0.53
CDH11	0.53
CDR1	0.53
CHN1	0.53
CCR1	0.53
EVI2A	0.53
MAP3K3	0.53
PRRX1	0.53
POU6F1	0.53
RNASE6	0.53
CCR2	0.53
IQSEC1	0.53
SPRY1	0.53
LILRA1	0.53
LILRA2	0.53
ARMC9	0.53
ADAMTS12	0.53
DACT3	0.53
MRGPRF	0.53
PLEKHO1	0.53
TLR7	0.53
ASPN	0.53
GIMAP4	0.53
SULF1	0.53
SLAMF8	0.53
HECW2	0.53
MXRA5	0.53
SIGLEC7	0.53
ADRA2A	0.52
C2	0.52
COL4A2	0.52
COL5A1	0.52
GNAI2	0.52
GYPC	0.52
MFAP4	0.52
PCOLCE	0.52
PDGFRL	0.52
PIK3CG	0.52
LHX8	0.52
PTGIS	0.52
RGS16	0.52
TNXB	0.52
HYAL2	0.52
HEPH	0.52
SH2B3	0.52
CELF2	0.52
C1ORF54	0.52
FAT4	0.52
TMEM47	0.52
CD99L2	0.52
ANTXR1	0.52
ZNF469	0.52
FAM167B	0.52
CCDC80	0.52
GLIPR2	0.52
CYTL1	0.52
CMTM3	0.52
NLRP12	0.52
PDE7B	0.52
BHLHE22	0.52
EFEMP2	0.52
AMPH	0.51
APBB1	0.51
COL1A2	0.51
COL5A2	0.51
DCN	0.51
EDNRB	0.51
FOXS1	0.51
GGTA1P	0.51
ICAM2	0.51
ISLR	0.51
KCNN3	0.51
CCL23	0.51
SGCD	0.51
GIMAP1	0.51
ZCCHC5	0.51
PXDN	0.51
ADAM12	0.51
MGAT4A	0.51
CXORF21	0.51
HMCN1	0.51
HIGD1B	0.51
SYDE1	0.51
TM6SF1	0.51
RASA3	0.51
MMRN1	0.51
GPRIN3	0.51
BHMT2	0.51
CASS4	0.51
FAM110B	0.51
MS4A7	0.51
CYS1	0.51
CD209	0.51
MS4A6A	0.51
AVPR1A	0.5
TNFSF8	0.5
DOCK2	0.5
EPHA3	0.5
FCGR2A	0.5
FES	0.5
GPR34	0.5
GRID1	0.5
IL1R1	0.5
INSR	0.5
ITGA9	0.5
LCP2	0.5
MNDA	0.5
OMD	0.5
CFP	0.5
PTGDR	0.5
GLIS3	0.5
SPI1	0.5
BEST1	0.5
GPR65	0.5
CD84	0.5
CCRL2	0.5
FCGR2C	0.5
GDF3	0.5
P2RY14	0.5
CPQ	0.5
POSTN	0.5
LILRB5	0.5
KCTD12	0.5
MS4A4A	0.5
CECR1	0.5
PTPN5	0.5
P4HA3	0.5
WDR86	0.5
KIF26B	0.5
SIRPB2	0.5
DOK5	0.5
RGL1	0.5
PHLDB1	0.5
FBXL7	0.5
LRRN4CL	0.5
HEG1	0.5
LIX1L	0.5
PILRA	0.5
AOX1	0.49
CD14	0.49
GFRA1	0.49
GPR21	0.49
HSPG2	0.49
IGFBP7	0.49
IL10	0.49
MAN2B1	0.49
SIGLEC1	0.49
SNAI1	0.49
ITM2A	0.49
LILRB2	0.49
LILRA6	0.49
FERMT3	0.49
RASSF4	0.49
EMILIN2	0.49
TLR8	0.49
DACT1	0.49
COX4I2	0.49
SSC5D	0.49
MARCH1	0.49
ENOX1	0.49
CARD8	0.49
CSGALNACT1	0.49
ZNF660	0.49
RCN3	0.49
FAM162B	0.49
SFMBT2	0.49
CD300LB	0.49
GREM1	0.49
FIBIN	0.49
ARHGAP18	0.49
ACTA2	0.48
LRRC15	0.48
C5AR1	0.48
CD28	0.48
CD53	0.48
DLG4	0.48
S1PR3	0.48
EDNRA	0.48
F2RL2	0.48
IRF8	0.48
IGF1	0.48
MSR1	0.48
RCVRN	0.48
RPS6KA2	0.48
CCL11	0.48
SPARC	0.48
TGFB1I1	0.48
THBS2	0.48
LHFPL2	0.48
RAI2	0.48
CD300C	0.48
FGL2	0.48
FERMT2	0.48
CD300A	0.48
TXNDC15	0.48
CALHM2	0.48
DIXDC1	0.48
TM6SF2	0.48
GNG2	0.48
SLC29A3	0.48
ATP8B2	0.48
MSRB3	0.48
SPATA13	0.48
WDFY4	0.48
LMOD1	0.48
CCDC69	0.48
RCSD1	0.48
C11ORF96	0.48
ADAMTSL1	0.48
DENND5B	0.48
GPSM3	0.48
ADORA1	0.47
ALPL	0.47
AVPR2	0.47
RUNX2	0.47
CCR4	0.47
COL1A1	0.47
CR1	0.47
EVI2B	0.47
FGR	0.47
IL2RA	0.47
ITGB2	0.47
KCND2	0.47
NNMT	0.47
PPEF1	0.47
RNASE1	0.47
SLC8A1	0.47
GXYLT2	0.47
LAT2	0.47
GAS7	0.47
AP1S2	0.47
MRC2	0.47
CHSY3	0.47
AKAP2	0.47
LINC00341	0.47
TMEM106A	0.47
BTBD19	0.47
PALM2-AKAP2	0.47
GIMAP5	0.47
TFEC	0.47
TMEM26	0.47
SH3PXD2B	0.47
TCEAL7	0.47
PBXIP1	0.47
NEGR1	0.47
MAGEH1	0.47
RGS18	0.47
ADORA2A	0.46
CALD1	0.46
COL12A1	0.46
DPT	0.46
GPR183	0.46
ERG	0.46
GRM2	0.46
GUCY1B3	0.46
HTR1B	0.46
KCNA5	0.46
MEF2C	0.46
MEF2D	0.46
MEIS3P1	0.46
MPP1	0.46
MRC1	0.46
PIP4K2A	0.46
PLCL1	0.46
SRGN	0.46
PTPRC	0.46
RGS3	0.46
OIT3	0.46
MIR100HG	0.46
SIGLEC5	0.46
GPRASP1	0.46
RASSF2	0.46
RUSC2	0.46
COL5A3	0.46
DIRC1	0.46
CLEC4A	0.46
NRIP2	0.46
MEDAG	0.46
KIAA0754	0.46
CPVL	0.46
PDZRN3	0.46
ZFPM2	0.46
FAM124A	0.46
SEMA3G	0.46
P2RY8	0.46
FAM26E	0.46
ABI3BP	0.46
SNX20	0.46
GBGT1	0.46
HTRA3	0.46
CDK15	0.46
ALOX5	0.45
BTK	0.45
CD86	0.45
CMA1	0.45
CTGF	0.45
CTSS	0.45
DPYSL2	0.45
ETS1	0.45
FCGR3A	0.45
DCLK2	0.45
ITPR1	0.45
CD180	0.45
MAP1A	0.45
MITF	0.45
GIMAP7	0.45
RELN	0.45
SGCB	0.45
TYROBP	0.45
PPFIA2	0.45
FGF18	0.45
WISP2	0.45
F2RL3	0.45
GMFG	0.45
ADAMTS14	0.45
GPC6	0.45
ARID5A	0.45
LYVE1	0.45
LILRB4	0.45
FAM124B	0.45
MAP1LC3C	0.45
PDGFD	0.45
NTM	0.45
SIDT2	0.45
C3ORF18	0.45
FKBP7	0.45
TWIST2	0.45
NFAM1	0.45
APBB1IP	0.45
MILR1	0.45
WBP1L	0.45
SOBP	0.45
ARHGEF40	0.45
DOK6	0.45
SLC24A2	0.45
ANKRD44	0.45
ARHGAP30	0.45
C1ORF162	0.45
SLC40A1	0.45
P3H1	0.45
ZNF781	0.45
SERPING1	0.44
C1R	0.44
C4A	0.44
CCR8	0.44
CRYBB1	0.44
CTSO	0.44
ECM2	0.44
F13A1	0.44
FAP	0.44
GPX8	0.44
GNG7	0.44
HTR2A	0.44
IL16	0.44
KCNA3	0.44
LAMB1	0.44
NAIP	0.44
OAZ2	0.44
PCSK1	0.44
PDE4B	0.44
PRKCB	0.44
PKN1	0.44
PTPRJ	0.44
THBS4	0.44
VAV1	0.44
WAS	0.44
TUBA1A	0.44
PLA2G7	0.44
CILP	0.44
CACNA1H	0.44
DOK2	0.44
ANGPTL1	0.44
RAPGEF2	0.44
HERPUD1	0.44
GIT2	0.44
VSIG4	0.44
DOK3	0.44
SYNDIG1	0.44
CYP2U1	0.44
FOXP3	0.44
ABI3	0.44
FAM105A	0.44
EPDR1	0.44
TMEM150B	0.44
TBC1D1	0.44
CRYGN	0.44
SLC24A4	0.44
PPP1R16B	0.44
VENTX	0.44
LINC00961	0.44
C1ORF216	0.44
ARHGDIB	0.43
LDLRAD4	0.43
FLT3	0.43
HSD11B1	0.43
LRP1	0.43
LTBP3	0.43
MYO9B	0.43
OGN	0.43
PLCB2	0.43
PTPRG	0.43
SCN3A	0.43
SELE	0.43
SLIT3	0.43
SMPD1	0.43
SPN	0.43
C15ORF54	0.43
COLQ	0.43
MPDZ	0.43
ITGBL1	0.43
LY86	0.43
DOCK4	0.43
SIGLEC14	0.43
MYL9	0.43
CD226	0.43
GSC	0.43
C19ORF35	0.43
SVEP1	0.43
CD300LF	0.43
PIK3R6	0.43
FAM49A	0.43
TXNDC5	0.43
DOCK8	0.43
C1QTNF2	0.43
SGIP1	0.43
P2RY13	0.43
EXOC3L1	0.43
SUPT20HL1	0.43
DOCK10	0.43
BMP8A	0.43
LATS2	0.43
ZNF491	0.43
TRAK2	0.42
ATP2A3	0.42
C3	0.42
SIGLEC6	0.42
CETP	0.42
CSF1	0.42
CSF2RA	0.42
CSF3R	0.42
CTSZ	0.42
FBLN1	0.42
FOXF1	0.42
GPM6B	0.42
GUCY1A2	0.42
LTBP2	0.42
MGAT1	0.42
MMP14	0.42
MOCS1	0.42
NFATC2	0.42
P2RX1	0.42
ENPP1	0.42
LGMN	0.42
PSAP	0.42
CCL13	0.42
CCL18	0.42
SFRP4	0.42
SNTB1	0.42
TCN2	0.42
PTCRA	0.42
SSPN	0.42
THEMIS2	0.42
ZBTB46	0.42
ARHGEF17	0.42
IGSF6	0.42
IKZF1	0.42
P3H3	0.42
ZC3H12D	0.42
KIAA0226L	0.42
CTHRC1	0.42
MRO	0.42
FKBP11	0.42
BIN2	0.42
TAGAP	0.42
HAVCR2	0.42
ADGRD1	0.42
BATF3	0.42
STAB2	0.42
ARHGAP15	0.42
RFTN1	0.42
RHOQ	0.42
FAM20C	0.42
CADM3	0.42
SCARF2	0.42
ZBTB20	0.42
LINC01558	0.42
SYNE3	0.42
SPRED1	0.42
ANGPT2	0.41
NKX3-2	0.41
RUNX1	0.41
CHST13	0.41
FCER1G	0.41
FZD2	0.41
ITGAX	0.41
PKD2	0.41
PLA2G5	0.41
STK10	0.41
TAGLN	0.41
TGFBR2	0.41
TWIST1	0.41
CNTNAP1	0.41
FIGNL2	0.41
ITGA10	0.41
CAMK1	0.41
ADAM19	0.41
FHL5	0.41
CYTIP	0.41
CALCRL	0.41
LRRC17	0.41
CLEC10A	0.41
TNFSF13B	0.41
TNFAIP8L2	0.41
KCTD17	0.41
ITM2C	0.41
CYYR1	0.41
CERCAM	0.41
MARCH2	0.41
GOLM1	0.41
SLC41A2	0.41
RSPO3	0.41
SASH3	0.41
MAGEL2	0.41
MXRA8	0.41
HABP4	0.41
HEY2	0.41
RNF180	0.41
KCNE4	0.41
SUCNR1	0.41
ADAMTS9	0.41
SEPN1	0.41
CPNE5	0.41
CHRDL2	0.41
CEP85L	0.41
GJD3	0.41
ADAMDEC1	0.41
VGLL3	0.41
PIEZO2	0.41
SAMSN1	0.41
PARVG	0.41
AIF1	0.4
ALOX5AP	0.4
AOAH	0.4
APOD	0.4
C1QC	0.4
C1S	0.4
CDH15	0.4
CHI3L1	0.4
DPYSL3	0.4
MS4A2	0.4
PRICKLE2	0.4
FFAR3	0.4
GRK5	0.4
CYR61	0.4
ITGA4	0.4
LCP1	0.4
MMP19	0.4
PRELP	0.4
TIFAB	0.4
PRPH2	0.4
SDC2	0.4
SLA	0.4
SNRPN	0.4
ADAMTS16	0.4
TIMP1	0.4
TPSAB1	0.4
WNT2	0.4
MAP3K12	0.4
DOCK11	0.4
ISM1	0.4
ABCA8	0.4
SORBS1	0.4
IQGAP2	0.4
MAPRE2	0.4
PTP4A3	0.4
CLEC4G	0.4
CCDC36	0.4
ZNF671	0.4
ATP8B4	0.4
SCUBE1	0.4
CD300E	0.4
LOC441204	0.4
ZNF582	0.4
ARHGEF25	0.4
IGSF21	0.4
RBPMS2	0.4
CPXM2	0.4
FAM225B	0.4
PRTG	0.4
TMEM140	0.4
SEPT6	0.4
SYNE1	0.4
CPXM1	0.4
PI16	0.4
FAM160B1	0.4
PHACTR1	0.4
CREB3L1	0.4
C19ORF38	0.4
P2RY10	0.4
TMEM233	0.4
PLPP4	0.4
ABL1	0.39
ALDH1B1	0.39
BGN	0.39
CD5	0.39
PPM1M	0.39
CHN2	0.39
COMP	0.39
GAS1	0.39
GNS	0.39
ICAM3	0.39
MAN1A1	0.39
MGP	0.39
NAP1L3	0.39
OPRL1	0.39
POU2F2	0.39
PTGER2	0.39
PTH1R	0.39
RNASE2	0.39
CCL2	0.39
ZNF154	0.39
CST7	0.39
CHRD	0.39
H6PD	0.39
FAM65B	0.39
ELMO1	0.39
RASA4	0.39
FARP1	0.39
CRTAP	0.39
AGPAT1	0.39
GRAP	0.39
MAGED2	0.39
AKAP13	0.39
C14ORF37	0.39
ORAI2	0.39
SHANK1	0.39
HSD17B14	0.39
PLA1A	0.39
PLPP7	0.39
TPCN1	0.39
SGTB	0.39
FAM46C	0.39
LAX1	0.39
KIF21B	0.39
MGRN1	0.39
PLA2G15	0.39
MEIS3	0.39
KLHL6	0.39
GPR141	0.39
LILRA5	0.39
ADGRG3	0.39
BOC	0.39
CHRDL1	0.39
FOXP1	0.39
GVINP1	0.39
EDA2R	0.39
SHE	0.39
TPSB2	0.39
EMX2OS	0.39
AGTR1	0.38
AMPD2	0.38
APBA2	0.38
ARRB2	0.38
SNAI3-AS1	0.38
CD80	0.38
CD33	0.38
CCR5	0.38
CPA3	0.38
CTSG	0.38
SARDH	0.38
DTX1	0.38
ELN	0.38
FCGR1A	0.38
FUT8	0.38
HLA-DPB1	0.38
IL2RB	0.38
IRF4	0.38
ITGAL	0.38
NCAM1	0.38
SERPINF1	0.38
ABCB1	0.38
SCT	0.38
SELL	0.38
SLAMF1	0.38
SLC8A3	0.38
SMARCD3	0.38
STAT5B	0.38
TBX15	0.38
TK2	0.38
CLIP2	0.38
TMEM170B	0.38
LOC401463	0.38
DGKD	0.38
GAB3	0.38
TNFSF13	0.38
ARHGEF2	0.38
NREP	0.38
TESPA1	0.38
DCANP1	0.38
NAALADL1	0.38
NR1H3	0.38
FRY	0.38
ARL6IP5	0.38
A2M-AS1	0.38
NDNF	0.38
GLIS1	0.38
RXFP3	0.38
SLC16A10	0.38
KIAA1755	0.38
SLCO1C1	0.38
SLC46A3	0.38
EVA1B	0.38
PLAC9	0.38
GALNT10	0.38
ITGA11	0.38
CHSY1	0.38
PAG1	0.38
TBC1D2B	0.38
KIAA1024	0.38
SATB2	0.38
LILRA4	0.38
TMEM2	0.38
EID1	0.38
LAMP5	0.38
CD248	0.38
GALNT16	0.38
AK5	0.38
DSEL	0.38
SLC43A2	0.38
PALD1	0.38
SCIMP	0.38
FKBP10	0.38
POM121L9P	0.38
ICOS	0.38
TRIM61	0.38
PLEKHG2	0.38
FAM101B	0.38
PLBD2	0.38
RHOH	0.37
BMP1	0.37
EVC	0.37
FGFR1	0.37
GYPE	0.37
CFH	0.37
ID3	0.37
ITGA7	0.37
ITGB3	0.37
LAMC1	0.37
SMAD9	0.37
MCAM	0.37
NAGA	0.37
NCF4	0.37
PGM5P2	0.37
PLEK	0.37
PRKD1	0.37
PTGFR	0.37
CCL22	0.37
SLC1A7	0.37
SLC11A1	0.37
TCF12	0.37
NR2F2	0.37
TRO	0.37
UTRN	0.37
FCN3	0.37
PLPP3	0.37
DCLK1	0.37
CCPG1	0.37
LPXN	0.37
GNA14	0.37
SDC3	0.37
GAB2	0.37
SEC24D	0.37
ARHGAP25	0.37
KLRG1	0.37
IFI30	0.37
SEMA6C	0.37
CORIN	0.37
NES	0.37
RBPMS	0.37
PIM2	0.37
LZTS1	0.37
RASSF8	0.37
PRAF2	0.37
PRICKLE1	0.37
IGFLR1	0.37
SLC2A10	0.37
CNPY4	0.37
C1QTNF6	0.37
RNF166	0.37
AGAP2	0.37
GPBAR1	0.37
GPR84	0.37
TLR9	0.37
ZNF843	0.37
LRRN3	0.37
ACSM5	0.37
ZSCAN2	0.37
RSPO1	0.37
DRAM1	0.37
PLCL2	0.37
COTL1	0.37
SCARA5	0.37
SIGLEC10	0.37
C20ORF166-AS1	0.37
LRCH2	0.37
SLC38A10	0.37
SRPX2	0.37
PRUNE2	0.37
FRMD3	0.37
JSRP1	0.37
ZNF831	0.37
LOC653653	0.37
P2RY12	0.37
VSTM4	0.36
UBL4B	0.36
KLF9	0.36
SERPINH1	0.36
CD1D	0.36
ADGRE5	0.36
CHRNA1	0.36
COL10A1	0.36
COL11A1	0.36
CREBL2	0.36
DIO2	0.36
LPAR1	0.36
PHC2	0.36
EPB41L2	0.36
FCGR1B	0.36
FHL3	0.36
RAPGEF1	0.36
HCLS1	0.36
HK3	0.36
IL7R	0.36
ITK	0.36
SPNS3	0.36
RARA	0.36
RGS4	0.36
RNASE4	0.36
SLC2A5	0.36
SSTR3	0.36
NRK	0.36
THPO	0.36
TSPAN4	0.36
UCP2	0.36
LST1	0.36
CPZ	0.36
ZNF358	0.36
RNF144A	0.36
PRG4	0.36
LAMC3	0.36
ATP8A1	0.36
VAMP5	0.36
HCST	0.36
ADAMTS5	0.36
AKNA	0.36
SLCO5A1	0.36
VASN	0.36
ALPK2	0.36
SHISA4	0.36
PRAM1	0.36
UBE2J1	0.36
SOX18	0.36
FAM134B	0.36
TMEM100	0.36
LINC01142	0.36
CCDC141	0.36
PARVA	0.36
DIP2C	0.36
APOBR	0.36
PIP5K1C	0.36
KCNK17	0.36
CYSLTR2	0.36
TSHZ3	0.36
FGD2	0.36
FBXO10	0.36
WDR81	0.36
PRR29	0.36
PRDM6	0.36
FAM229B	0.36
PHOSPHO1	0.36
GALM	0.36
C1QA	0.35
C1QB	0.35
COL6A6	0.35
CALU	0.35
CD63	0.35
CD69	0.35
CCR6	0.35
CNN1	0.35
FGF10	0.35
FLNC	0.35
GDF10	0.35
GP5	0.35
CXCR3	0.35
HCK	0.35
INS-IGF2	0.35
HEXB	0.35
HRH2	0.35
TNFRSF9	0.35
KCNMB1	0.35
LOXL1	0.35
MUSK	0.35
MYBPH	0.35
GAPT	0.35
PTGER4	0.35
SNAI3	0.35
S100A4	0.35
SLC12A3	0.35
TACR1	0.35
PAPSS2	0.35
CXCL13	0.35
GPR182	0.35
TMEM240	0.35
CORO7	0.35
TNFSF12-TNFSF13	0.35
CASC4	0.35
KCNT2	0.35
SLAMF6	0.35
MZB1	0.35
GMIP	0.35
SNX9	0.35
ASB1	0.35
TMEM55A	0.35
TENM3	0.35
ZNF25	0.35
RHOBTB2	0.35
ALPK3	0.35
WFDC1	0.35
FCGR1C	0.35
NEXN	0.35
NKAPL	0.35
CLEC4E	0.35
BACH2	0.35
PURG	0.35
DMGDH	0.35
SMOC2	0.35
XYLT1	0.35
DPEP2	0.35
BRE-AS1	0.35
ACP2	0.34
ARRB1	0.34
ASGR1	0.34
AXL	0.34
CASQ2	0.34
CD3G	0.34
CD48	0.34
CD68	0.34
CEACAM4	0.34
CX3CR1	0.34
ELANE	0.34
FOXO1	0.34
FRZB	0.34
GPX7	0.34
ITIH4	0.34
AFF3	0.34
LOXL2	0.34
LUM	0.34
NBL1	0.34
NFATC1	0.34
NOTCH4	0.34
PDE4A	0.34
DNAJC18	0.34
SCN7A	0.34
SLC18A2	0.34
CLEC4C	0.34
FAM180B	0.34
TPM2	0.34
WNT9B	0.34
XBP1	0.34
LOC400940	0.34
KCNAB2	0.34
NRP2	0.34
RAB33A	0.34
GRAP2	0.34
AKAP12	0.34
MICAL2	0.34
ARMCX2	0.34
KBTBD11	0.34
SPON2	0.34
ADAMTS8	0.34
VASH2	0.34
GRIP2	0.34
GDPD5	0.34
C1ORF127	0.34
SLC45A1	0.34
TXNDC11	0.34
SLC22A17	0.34
BTLA	0.34
HMGCLL1	0.34
PPM1K	0.34
CHST12	0.34
MAST3	0.34
PCDHGA5	0.34
DDAH2	0.34
FAM225A	0.34
PLD4	0.34
TDRD6	0.34
GRAMD1A	0.34
BMF	0.34
SHC2	0.34
DERL3	0.34
EGFL6	0.34
TPK1	0.34
LAT	0.34
DENND2A	0.34
RBMS3	0.34
CLEC6A	0.34
CTNNA3	0.34
GREM2	0.34
RASAL3	0.34
ACTC1	0.33
ADCY2	0.33
ACAN	0.33
BIN1	0.33
CAMK4	0.33
CCIN	0.33
CD6	0.33
CHRND	0.33
COL8A2	0.33
COL13A1	0.33
CREM	0.33
GATA1	0.33
GNGT2	0.33
HLA-DPA1	0.33
RBPJ	0.33
IL6ST	0.33
INPP5D	0.33
JAK1	0.33
LIPA	0.33
LPL	0.33
LYL1	0.33
GADD45B	0.33
TIGIT	0.33
PIK3R1	0.33
PITX3	0.33
PRKACB	0.33
PTGDS	0.33
S100A1	0.33
SATB1	0.33
CLEC11A	0.33
CCL21	0.33
ST6GAL1	0.33
SIPA1	0.33
SLC2A3	0.33
THBS1	0.33
CARMN	0.33
ST8SIA4	0.33
AP1M1	0.33
USP13	0.33
MAGED1	0.33
ADAMTS3	0.33
CBLN4	0.33
RAB11FIP3	0.33
GFPT2	0.33
CLEC4D	0.33
PNPLA6	0.33
FAM107A	0.33
LRRC66	0.33
FBXO31	0.33
RIN3	0.33
CCDC178	0.33
HAPLN3	0.33
OTOA	0.33
SPATC1	0.33
CYGB	0.33
KLHL30	0.33
C1QTNF1	0.33
ZNF583	0.33
IL21R	0.33
FCRL5	0.33
RILP	0.33
HDAC7	0.33
L3MBTL3	0.33
ADGRE3	0.33
GLIS2	0.33
PLXDC2	0.33
MURC	0.33
FAM195B	0.33
CNTN4	0.33
ZNF853	0.33
FAM20A	0.33
XKR8	0.33
ACOXL	0.33
CSGALNACT2	0.33
FNBP1	0.33
TBCEL	0.33
FAM189A1	0.33
BACE1	0.33
NPDC1	0.33
RBM24	0.33
SLAMF7	0.33
GIMAP2	0.33
NATD1	0.33
GRASP	0.33
ST8SIA5	0.33
GPR132	0.33
SIRPD	0.33
TNN	0.33
NPAS3	0.33
CLSTN2	0.33
ANGPT1	0.32
NLRC3	0.32
CD3E	0.32
CD27	0.32
CISH	0.32
CRY2	0.32
MEGF8	0.32
HLA-DMB	0.32
MATK	0.32
MYOG	0.32
PKD1	0.32
SCN1B	0.32
SGCA	0.32
SYNPO2	0.32
FAM155A	0.32
C20ORF202	0.32
CASC15	0.32
SLC14A2	0.32
ENC1	0.32
FGF16	0.32
WISP1	0.32
CH25H	0.32
ASB5	0.32
IGDCC3	0.32
NCOR2	0.32
PDE4DIP	0.32
CLSTN3	0.32
IP6K1	0.32
PABPC5	0.32
CEP170	0.32
AKT3	0.32
CD96	0.32
BATF	0.32
CYP46A1	0.32
CORO1A	0.32
RNF122	0.32
CYBRD1	0.32
UBTD1	0.32
CD276	0.32
RPLP0P2	0.32
TTYH3	0.32
LIMD2	0.32
SLC27A1	0.32
PM20D1	0.32
C2ORF88	0.32
RAB8B	0.32
MYO18B	0.32
C10ORF71	0.32
PRKAG3	0.32
GPR173	0.32
PCDHB18P	0.32
UACA	0.32
LRRC36	0.32
FNDC3A	0.32
SAMD3	0.32
SAMD4A	0.32
RNF130	0.32
TTC28	0.32
SLC39A14	0.32
CADM2	0.32
MCOLN1	0.32
UNC5A	0.32
KIAA1210	0.32
NLGN2	0.32
CARNS1	0.32
MYADM	0.32
NAPSB	0.32
CACNA2D4	0.32
PDZRN4	0.32
SLC39A8	0.32
ARHGAP9	0.32
ZNF106	0.32
RFTN2	0.32
CREB3L2	0.32
MICAL1	0.32
CRTC3	0.32
ADRA1D	0.31
ABCD2	0.31
APBB2	0.31
ARSE	0.31
ASGR2	0.31
CACNA1S	0.31
CACNB1	0.31
CACNG1	0.31
CD2	0.31
CDR2	0.31
TPP1	0.31
DRP2	0.31
DUSP3	0.31
F5	0.31
FN1	0.31
FUCA1	0.31
FUT7	0.31
HLA-DRA	0.31
IGF2	0.31
ITGB5	0.31
LY9	0.31
MMP9	0.31
MMP11	0.31
MYOD1	0.31
NAGLU	0.31
NF2	0.31
CLDN11	0.31
CNTN3	0.31
PDE2A	0.31
FXYD1	0.31
HTRA1	0.31
PSD	0.31
PTGIR	0.31
TDO2	0.31
ANO5	0.31
C1ORF140	0.31
CXCR4	0.31
ACOX2	0.31
KMO	0.31
CACNA1G	0.31
HERC1	0.31
FCMR	0.31
MSC	0.31
QKI	0.31
HAND2	0.31
TRAM2	0.31
TGOLN2	0.31
NEK6	0.31
ZNF275	0.31
FICD	0.31
TWF2	0.31
C17ORF51	0.31
GLT1D1	0.31
ARHGAP28	0.31
CLEC4GP1	0.31
CERKL	0.31
TMEM110	0.31
UNC45B	0.31
TMEM200A	0.31
DPY19L3	0.31
ARMCX1	0.31
EVL	0.31
GPR174	0.31
MS4A14	0.31
FAM109B	0.31
LINGO1	0.31
ZNF382	0.31
DISP1	0.31
SLC25A45	0.31
C16ORF54	0.31
PXK	0.31
WIPI1	0.31
EOGT	0.31
DMXL2	0.31
ATP1B4	0.31
CLEC5A	0.31
AMOT	0.31
SLC39A13	0.31
PLXNA4	0.31
SLFN11	0.31
SNORD116-20	0.31
KCNG2	0.31
SLC17A5	0.31
TBC1D16	0.31
HSPB7	0.31
NMRK2	0.31
PDLIM3	0.31
OSCAR	0.31
C16ORF86	0.31
MUSTN1	0.31
C4ORF50	0.31
LINC00937	0.31
PARVB	0.31
ADGRE2	0.31
POPDC2	0.31
FNDC4	0.31
ACACB	0.3
ACHE	0.3
TNFRSF17	0.3
BMPR2	0.3
C6	0.3
CD37	0.3
CD81	0.3
CHRNG	0.3
CCR7	0.3
COX7A1	0.3
DAZL	0.3
DES	0.3
DMPK	0.3
XIRP1	0.3
FMO1	0.3
HBD	0.3
MCEMP1	0.3
HRC	0.3
ITGB7	0.3
KCNJ6	0.3
KCNMA1	0.3
MFAP2	0.3
MFGE8	0.3
NDN	0.3
NID1	0.3
NPY5R	0.3
PLN	0.3
PRCP	0.3
PTK7	0.3
RAPSN	0.3
RDH5	0.3
RNASE3	0.3
SUPT20HL2	0.3
ATXN1	0.3
SOX11	0.3
SSTR1	0.3
TPM1	0.3
TRPC6	0.3
FAM174B	0.3
GRAPL	0.3
SLC30A2	0.3
PTP4A2	0.3
HDX	0.3
FZD1	0.3
C9ORF139	0.3
UTF1	0.3
SLC43A1	0.3
PSTPIP1	0.3
SLC16A4	0.3
STK17B	0.3
SELM	0.3
CTIF	0.3
PHTF1	0.3
KDELR3	0.3
LINGO4	0.3
FAM101A	0.3
FYCO1	0.3
CMTM7	0.3
SYNPO2L	0.3
ANKRD53	0.3
TMEM121	0.3
CD300LG	0.3
VGLL2	0.3
C1QTNF3	0.3
DIRAS1	0.3
PLCXD3	0.3
FAM107B	0.3
LEF1	0.3
PPP1R27	0.3
HHIPL1	0.3
GPRC5B	0.3
IP6K3	0.3
MYOZ2	0.3
MYPN	0.3
TRIM55	0.3
TMC2	0.3
SSH2	0.3
PIK3AP1	0.3
IL17D	0.3
UBASH3A	0.3
PCBP3	0.3
LOC283731	0.3
VPS13C	0.3
CREBRF	0.3
DET1	0.3
MAP1S	0.3
KIRREL	0.3
PRR34	0.3
TCF25	0.3
SARM1	0.3
TPSD1	0.3
PRND	0.3
CAMK1G	0.3
TMEM263	0.3
TMEM98	0.3
TMEM130	0.3
DUSP27	0.3
COL6A5	0.3
CYFIP2	0.3
PCED1B-AS1	0.3
ERLEC1	0.3
CCDC102A	0.3
CADPS2	0.3
NUGGC	0.3
IL4I1	0.3
SH3KBP1	0.3
LIMS3	0.3
MMP25	0.3
LMF1	0.3
ACTN2	0.29
DNM1P46	0.29
BPI	0.29
CACNB2	0.29
SLC25A20	0.29
CAMK2A	0.29
EMX2	0.29
GH1	0.29
HSPB2	0.29
HTR1F	0.29
IL12RB1	0.29
LCK	0.29
TXLNB	0.29
LMO2	0.29
LRP3	0.29
SH2D1A	0.29
CEP112	0.29
MYBPC2	0.29
MYF5	0.29
MYL2	0.29
PKD1L1	0.29
NEB	0.29
NUCB1	0.29
PALM	0.29
PDE1C	0.29
PDE4D	0.29
SCN5A	0.29
SEL1L	0.29
SLC6A6	0.29
STAT5A	0.29
CDKL5	0.29
TAC1	0.29
TRAF5	0.29
TTC3	0.29
KCNAB1	0.29
MMP23B	0.29
UNC5C	0.29
CTSF	0.29
CYTH3	0.29
CD83	0.29
MYL6B	0.29
AKAP6	0.29
LITAF	0.29
PPM1F	0.29
KIAA0355	0.29
TOX	0.29
TRANK1	0.29
NUAK1	0.29
IFITM2	0.29
ARPP21	0.29
ME3	0.29
KLF12	0.29
GABARAP	0.29
RSPO2	0.29
CLMP	0.29
LINC00982	0.29
ZKSCAN2	0.29
ASXL3	0.29
SYNC	0.29
ST6GALNAC5	0.29
ZNF578	0.29
CILP2	0.29
GCSAML	0.29
GRIN3A	0.29
CLNK	0.29
MAS1L	0.29
PI15	0.29
EGFL7	0.29
MFSD7	0.29
RAB23	0.29
SCX	0.29
RBFOX1	0.29
ZNF331	0.29
LINC00323	0.29
LIMCH1	0.29
GLT8D1	0.29
EPB41L3	0.29
PCDHA3	0.29
SPECC1L	0.29
LY96	0.29
C9ORF47	0.29
SMCO4	0.29
PMEPA1	0.29
NCKAP5L	0.29
TTLL1	0.29
LOC100130872	0.29
TCTN3	0.29
TIAM2	0.29
CACNG6	0.29
SRPK3	0.29
TMEM132C	0.29
LOXHD1	0.29
CSDC2	0.29
WTIP	0.29
MYLPF	0.29
BMS1P20	0.29
PKNOX2	0.29
XIRP2	0.29
ADARB1	0.28
ADH1B	0.28
ADORA3	0.28
ATM	0.28
BMP6	0.28
CD52	0.28
CFL2	0.28
CNN3	0.28
COL4A3	0.28
CYP19A1	0.28
CYB5R3	0.28
DTNA	0.28
PHC1	0.28
ESRRG	0.28
FCAR	0.28
GLG1	0.28
GMPR	0.28
ID4	0.28
JCHAIN	0.28
IL9R	0.28
JAK3	0.28
KCNA4	0.28
KIT	0.28
LEPR	0.28
MAP6	0.28
MAPT	0.28
MFNG	0.28
CD200	0.28
RGL4	0.28
MYH3	0.28
NRAP	0.28
P2RX5	0.28
RAB27A	0.28
RCN1	0.28
RTN2	0.28
ARX	0.28
SPTB	0.28
SSR2	0.28
PXDNL	0.28
LOC400043	0.28
CLDN5	0.28
TNNI1	0.28
TNNT3	0.28
ZNF135	0.28
DPF3	0.28
PEA15	0.28
RGS11	0.28
GYG2	0.28
RGN	0.28
MYOM2	0.28
MYOT	0.28
SOCS5	0.28
ARL4C	0.28
SIRPB1	0.28
RFX8	0.28
ACAA2	0.28
CAP2	0.28
RABAC1	0.28
MXD4	0.28
SDS	0.28
LILRA3	0.28
C10ORF10	0.28
BTN3A2	0.28
PADI2	0.28
BEST3	0.28
DUSP26	0.28
FAM65A	0.28
ZNF677	0.28
MS4A6E	0.28
CSMD2	0.28
RBP5	0.28
SLA2	0.28
LDOC1L	0.28
ARMCX3	0.28
C2ORF40	0.28
NT5C1A	0.28
SHANK3	0.28
DNAJC5B	0.28
FXYD7	0.28
GPR88	0.28
SPIN2A	0.28
PGPEP1	0.28
SIGLEC17P	0.28
LIMS2	0.28
SEPT11	0.28
PCNX	0.28
UHRF1BP1L	0.28
ZKSCAN7	0.28
PACS2	0.28
WDR7	0.28
LMOD3	0.28
ZNF454	0.28
PLD3	0.28
C14ORF132	0.28
JPH2	0.28
TRIM54	0.28
ZNF608	0.28
ARHGAP20	0.28
SHF	0.28
CCDC149	0.28
MTURN	0.28
TICAM2	0.28
ITGB1BP2	0.28
TVP23A	0.28
NAAA	0.28
GPR82	0.28
CNTN6	0.28
C2CD4B	0.28
SCAMP5	0.28
MDFIC	0.28
ST6GALNAC6	0.28
ITPRIPL2	0.28
RAB37	0.28
BTN1A1	0.27
C21ORF2	0.27
CAMK2B	0.27
CAV3	0.27
CCKAR	0.27
SCARB2	0.27
HAPLN1	0.27
CSF2RB	0.27
CYP1B1	0.27
EMP3	0.27
STX2	0.27
FCGR3B	0.27
GNB3	0.27
GZMK	0.27
GZMM	0.27
HAS1	0.27
HLA-DRB1	0.27
HTR6	0.27
IFNAR2	0.27
IL5RA	0.27
CXCR2P1	0.27
IL11RA	0.27
IL12B	0.27
IL13	0.27
ILK	0.27
ITIH3	0.27
KCNA6	0.27
KLRB1	0.27
ANKRD23	0.27
LGALS2	0.27
LIF	0.27
LIMS1	0.27
LTA	0.27
LTC4S	0.27
SMAD6	0.27
MAS1	0.27
MYH1	0.27
NPY1R	0.27
ROR2	0.27
PAM	0.27
PDGFB	0.27
PODXL	0.27
PTGER3	0.27
RYR1	0.27
SCN4A	0.27
CCL8	0.27
SGCG	0.27
SSR4	0.27
TFPI	0.27
TMOD1	0.27
TTN	0.27
EPM2A	0.27
CSRP3	0.27
PWAR5	0.27
SLC25A53	0.27
CDC42BPA	0.27
TNFSF11	0.27
PLPP1	0.27
B3GALT1	0.27
LDLRAD2	0.27
ADAM6	0.27
NDST3	0.27
SLC9A3R2	0.27
SLIT2	0.27
CUL7	0.27
TRDN	0.27
RASL10A	0.27
BVES	0.27
MAP4K1	0.27
SYNPO	0.27
SLC2A14	0.27
C17ORF62	0.27
GAL3ST4	0.27
LY6G5C	0.27
SDSL	0.27
LBH	0.27
GALNTL6	0.27
RNF146	0.27
SPRY4	0.27
OSBPL5	0.27
ATP6V0D2	0.27
STAC3	0.27
APH1B	0.27
METTL11B	0.27
RAB9B	0.27
OBSCN	0.27
PRR16	0.27
PRRX2	0.27
HVCN1	0.27
NBAS	0.27
RASD1	0.27
GHRL	0.27
ST6GAL2	0.27
C1ORF198	0.27
SLC35B4	0.27
C11ORF24	0.27
SMIM10	0.27
IKZF3	0.27
[truncated: 18,436 more rows]

## Sheet: KIRC
ROBO4	0.86
ENG	0.84
ESAM	0.84
CD34	0.83
PCDH12	0.83
ARHGEF15	0.83
CDH5	0.82
CXORF36	0.82
RASIP1	0.81
CLEC14A	0.81
MMRN2	0.8
GIPC3	0.8
ERG	0.79
HSPA12B	0.79
ECSCR	0.79
SOX17	0.79
PECAM1	0.78
TIE1	0.78
CCM2L	0.78
THSD1	0.78
BCL6B	0.78
IL3RA	0.77
PDGFB	0.77
EFCC1	0.77
PLVAP	0.77
CNRIP1	0.77
JAG2	0.76
NOVA2	0.76
RPS6KA2	0.76
SCARF1	0.76
DCHS1	0.76
SH2D3C	0.76
DOCK6	0.76
A2M	0.75
ICAM2	0.75
TP53I11	0.75
PPM1F	0.75
MYCT1	0.75
PLXND1	0.75
EHD4	0.75
ARAP3	0.75
FLT4	0.74
ITPKB	0.74
RAMP2	0.74
CD93	0.74
RHOJ	0.74
GSN	0.73
LMO2	0.73
GRAP	0.73
NES	0.73
JAM3	0.73
VWA1	0.73
FYN	0.72
GRK5	0.72
HSPG2	0.72
SEMA6B	0.72
TMEM204	0.72
DLL4	0.72
EFNB2	0.71
MCAM	0.71
TBXA2R	0.71
ZNF423	0.71
EXOC3L2	0.71
NOTCH4	0.7
OLFML2A	0.7
VWF	0.7
LDB2	0.7
TNFAIP8L1	0.7
FAM212A	0.7
CSPG4	0.69
FLI1	0.69
GPR4	0.69
AFAP1L1	0.69
NOS3	0.69
RAMP3	0.69
CYYR1	0.69
TCF7L1	0.69
MFRP	0.69
C3ORF70	0.69
SIPA1L2	0.69
DUSP7	0.68
S1PR1	0.68
LRRC32	0.68
NOTCH1	0.68
SPRY4	0.68
FGD5	0.68
ADCY4	0.67
GNAI2	0.67
SEMA3F	0.67
SPARC	0.67
EXOC3L1	0.67
CHST7	0.67
ADGRA2	0.67
COL4A1	0.66
COL4A2	0.66
COL15A1	0.66
EPAS1	0.66
INSR	0.66
PDE2A	0.66
PIK3C2B	0.66
PLXNA2	0.66
SEC14L1	0.66
SLC9A3R2	0.66
PEAR1	0.66
CLEC1A	0.66
SOX18	0.66
C15ORF39	0.66
SHE	0.66
JAG1	0.65
OAZ2	0.65
TCF4	0.65
PIK3R3	0.65
FAM167B	0.65
TMEM255B	0.65
LHX6	0.65
APLNR	0.64
ARRB1	0.64
CDH13	0.64
MEF2C	0.64
SLC1A4	0.64
ADAMTS7	0.64
FAM110D	0.64
SOX7	0.64
PALMD	0.64
UNC5B	0.64
GIMAP8	0.64
FAM26E	0.64
TMEM88	0.64
ADGRL4	0.64
RILPL2	0.64
GJA1	0.63
KDR	0.63
DYSF	0.63
NUAK1	0.63
PRSS23	0.63
CYGB	0.63
USHBP1	0.63
PTRF	0.63
SEMA4C	0.63
ARHGAP23	0.63
RASGRP3	0.63
SNED1	0.63
RFTN2	0.63
MARCKSL1	0.63
BGN	0.62
FKBP1A	0.62
GJA5	0.62
NOTCH3	0.62
PDGFRB	0.62
RARG	0.62
SMTN	0.62
HYAL2	0.62
RAPGEF5	0.62
HEPH	0.62
SH2B3	0.62
DLC1	0.62
FAM124B	0.62
NRARP	0.62
CALM1	0.61
CRIP2	0.61
EBF1	0.61
RGS3	0.61
ZBTB46	0.61
KIAA0355	0.61
CDC42EP3	0.61
GPIHBP1	0.61
CBX2	0.61
SNRK	0.61
P2RY8	0.61
ZNF792	0.61
ELK3	0.6
GABRD	0.6
GJA4	0.6
GRB10	0.6
CCL14	0.6
TNFAIP1	0.6
ARHGEF17	0.6
PEAK1	0.6
SYDE1	0.6
MANSC1	0.6
CEP68	0.6
SLC44A2	0.6
SHROOM4	0.6
ARHGAP31	0.6
RGCC	0.6
CTNNB1	0.59
PTPRB	0.59
ZEB1	0.59
TEK	0.59
NRIP2	0.59
CALHM2	0.59
LIMS2	0.59
NYNRIN	0.59
FMNL3	0.59
DKK3	0.59
ENTPD1	0.58
EMP2	0.58
GPR21	0.58
HRC	0.58
MEF2D	0.58
PODXL	0.58
TGFB1I1	0.58
SH3BP5	0.58
GJC1	0.58
SPRY1	0.58
LRRC8C	0.58
AFAP1L2	0.58
MPRIP	0.58
KIAA1462	0.58
KANK2	0.58
FILIP1	0.58
PCDH17	0.58
KANK3	0.58
CPT1C	0.58
POPDC2	0.58
EDNRA	0.57
FES	0.57
GPR3	0.57
KLC1	0.57
LAMB2	0.57
RNASE1	0.57
SKI	0.57
GIMAP1	0.57
THY1	0.57
TRPC4	0.57
C20ORF202	0.57
TMC7	0.57
GIMAP6	0.57
HHIPL1	0.57
VASH1	0.57
PAMR1	0.57
HEYL	0.57
BMX	0.56
ETS1	0.56
FLT1	0.56
INPP5A	0.56
CLDN5	0.56
TNFRSF4	0.56
PEA15	0.56
ZNF833P	0.56
AATK	0.56
LAYN	0.56
ITPRIP	0.56
KLHDC8A	0.56
MAML3	0.56
LRRC70	0.56
FBXL7	0.56
DOCK9	0.56
TNS2	0.56
HEY1	0.56
LRRC8A	0.56
PLEKHG1	0.56
HEG1	0.56
CASKIN2	0.56
GRASP	0.56
C11ORF95	0.55
EMP1	0.55
EPHB4	0.55
GGT5	0.55
GRIK3	0.55
NDST1	0.55
MAPK3	0.55
MYOM1	0.55
NRP1	0.55
LZTS1	0.55
GFOD2	0.55
RASL12	0.55
SHANK3	0.55
FXYD6	0.55
GIMAP5	0.55
PDE7B	0.55
MYLIP	0.55
PKN3	0.55
ADPRH	0.54
ARHGDIB	0.54
DUSP6	0.54
HLX	0.54
ZNF366	0.54
KCNN2	0.54
LAMA4	0.54
SPRED2	0.54
KLHDC8B	0.54
MYO1B	0.54
SEPT4	0.54
PRKCH	0.54
SLIT3	0.54
GNA14	0.54
LHFP	0.54
NRROS	0.54
KIAA1211L	0.54
TANC1	0.54
HID1	0.54
NID2	0.54
PPP1R13B	0.54
ANO2	0.54
ST6GALNAC3	0.54
ACE	0.53
HIP1	0.53
PDCL	0.53
RBMS2	0.53
SLCO2A1	0.53
TAL1	0.53
KCNE3	0.53
CDC42EP2	0.53
GPR176	0.53
ZNF362	0.53
FRMD8	0.53
EGFL7	0.53
TPPP3	0.53
EMCN	0.53
NEURL1B	0.53
UACA	0.53
ANO1	0.53
HEY2	0.53
ANKRD50	0.53
ATP1B2	0.52
CDKN2B	0.52
ITGA9	0.52
GIMAP7	0.52
TGFBR2	0.52
C15ORF54	0.52
COL21A1	0.52
LBH	0.52
S1PR5	0.52
SWAP70	0.52
STARD13	0.52
IL33	0.52
TMEM184B	0.52
PRR29	0.52
RBMS3	0.52
TMOD2	0.52
BMP6	0.51
C4ORF32	0.51
ID3	0.51
INHBB	0.51
SELP	0.51
TACR1	0.51
TCF15	0.51
RGS5	0.51
PLPP1	0.51
CYTH3	0.51
RAPGEF4	0.51
KCTD15	0.51
ABI3	0.51
MON1A	0.51
SLCO1C1	0.51
BTBD3	0.51
EPN2	0.51
MCF2L	0.51
RABGAP1	0.51
SEMA3G	0.51
HECW2	0.51
JAM2	0.51
FHOD1	0.51
CYP4X1	0.51
PRDM1	0.5
RUNX1T1	0.5
EML1	0.5
EXTL3	0.5
ITGA1	0.5
MYH9	0.5
PKD1L1	0.5
NID1	0.5
ATP8B1	0.5
CHST1	0.5
F2RL3	0.5
NOL4L	0.5
CALCRL	0.5
GDF11	0.5
KLF2	0.5
LINGO1	0.5
LRRC55	0.5
JDP2	0.5
STIM2	0.5
LIX1L	0.5
FOXD2	0.49
HDAC1	0.49
SMAD6	0.49
MGP	0.49
NFATC4	0.49
TBX2	0.49
TIMP3	0.49
TPSAB1	0.49
TRPC6	0.49
MRVI1	0.49
OR51E1	0.49
TSPAN14	0.49
CDC42EP5	0.49
MIR4435-2HG	0.49
FAM163A	0.49
GALNT15	0.49
GNG2	0.49
GFOD1	0.49
GIMAP4	0.49
KCNE4	0.49
FATE1	0.49
EBF3	0.49
FAM162B	0.49
ZNF71	0.49
PARM1	0.49
PPP1R16B	0.49
XYLT1	0.49
RAPH1	0.49
EFNB3	0.48
FOXS1	0.48
HOXD9	0.48
LAMC1	0.48
MSN	0.48
PTGIR	0.48
PTK2	0.48
VCL	0.48
FAM131B	0.48
TRIL	0.48
ZDHHC14	0.48
UNC45B	0.48
ANTXR1	0.48
MSRB3	0.48
CPNE5	0.48
EML3	0.48
PALD1	0.48
CCDC184	0.48
REM1	0.48
ADCY3	0.47
APBB2	0.47
GUCY1A2	0.47
KCNJ2	0.47
NRGN	0.47
ST3GAL2	0.47
TJP1	0.47
RECK	0.47
FHL5	0.47
GMFG	0.47
PHACTR2	0.47
TECPR2	0.47
PDGFD	0.47
KCTD10	0.47
HIGD1B	0.47
PALM2-AKAP2	0.47
PCDH18	0.47
DAAM2	0.47
NPDC1	0.47
PLSCR3	0.47
CD248	0.47
PNMAL2	0.47
SLCO3A1	0.47
TPSB2	0.47
VSTM4	0.46
ANGPT2	0.46
FAM43A	0.46
CACNA1C	0.46
DLX1	0.46
F2R	0.46
KCNN3	0.46
PHF2	0.46
ADAMTS5	0.46
PTP4A3	0.46
C1ORF54	0.46
FBLIM1	0.46
PIP5K1C	0.46
TMCC3	0.46
BOC	0.46
FBLN2	0.45
GNL1	0.45
LY6H	0.45
MSX1	0.45
SNAI1	0.45
VASP	0.45
FRY	0.45
LAMC3	0.45
TESK2	0.45
CYSLTR1	0.45
NR2F1-AS1	0.45
COL18A1	0.45
TMTC1	0.45
RAMP2-AS1	0.45
RAET1G	0.45
MYOZ1	0.45
SLC35F1	0.45
PIEZO2	0.45
NR5A2	0.44
ITGB1	0.44
KCNJ8	0.44
KIF5C	0.44
LYL1	0.44
SRL	0.44
UTRN	0.44
FCN3	0.44
MAP3K6	0.44
MAP4K4	0.44
GDF3	0.44
SOX13	0.44
FEZ1	0.44
ADAMTSL2	0.44
IQSEC1	0.44
HDAC5	0.44
CHSY3	0.44
ESM1	0.44
PRRG3	0.44
LINC00341	0.44
APOLD1	0.44
FAM110A	0.44
DHH	0.44
PGM2L1	0.44
RFTN1	0.44
GPR161	0.44
PRND	0.44
ZMIZ1	0.44
TNRC6C	0.44
C10ORF54	0.44
CETP	0.43
FHL3	0.43
HIC1	0.43
HTR1B	0.43
ITGA5	0.43
MFNG	0.43
PRKG1	0.43
RARB	0.43
TBX3	0.43
TLN1	0.43
LUZP1	0.43
ZBTB22	0.43
RASAL2	0.43
ELMO1	0.43
MPZL2	0.43
NMUR1	0.43
CYP46A1	0.43
C3ORF36	0.43
APCDD1	0.43
PTGER4P2-CDK2AP2P2	0.43
NOSTRIN	0.43
SLC10A6	0.43
HMCN1	0.43
FKBP7	0.43
CFAP74	0.43
KLHL23	0.43
ZDHHC22	0.43
ARL15	0.43
PLAC9	0.43
RBFOX2	0.43
DLX6-AS1	0.43
ACKR3	0.43
KIAA1257	0.43
DISC1	0.43
LINC00961	0.43
TTYH2	0.43
GDF6	0.43
FBN1	0.42
MS4A2	0.42
FOXF1	0.42
GPR20	0.42
AGFG2	0.42
SMAD1	0.42
ATXN3	0.42
NFIB	0.42
NGF	0.42
FSCN1	0.42
KALRN	0.42
ABCC9	0.42
NOD1	0.42
CDC42EP1	0.42
NHSL2	0.42
FAM89A	0.42
LY6G5C	0.42
DCLK3	0.42
LXN	0.42
PRKD2	0.42
OLFML2B	0.42
C2CD2	0.42
PITPNC1	0.42
EHD2	0.42
RASAL2-AS1	0.42
ZFHX3	0.41
CRK	0.41
DOCK1	0.41
ECE1	0.41
S1PR3	0.41
HHEX	0.41
IGFBP7	0.41
LIPE	0.41
FOXO4	0.41
NGFR	0.41
P2RY1	0.41
ENPP2	0.41
RSU1	0.41
SLC14A1	0.41
VEGFC	0.41
PIP4K2B	0.41
APLN	0.41
SYNJ2	0.41
ARHGEF10	0.41
SORBS3	0.41
CCDC102B	0.41
GPR146	0.41
RBP7	0.41
TMEM47	0.41
TRPV2	0.41
HDAC7	0.41
ARHGAP17	0.41
ITGA11	0.41
ZCCHC24	0.41
FAM212B	0.41
EPHX4	0.41
PLXDC1	0.41
SEPN1	0.41
ATP8B2	0.41
LATS2	0.41
HTR7P1	0.41
PINK1	0.41
ADARB1	0.4
ADRA1B	0.4
ATP2A3	0.4
CD1D	0.4
CHRM3	0.4
DLX5	0.4
EDNRB	0.4
ITGA7	0.4
JUP	0.4
MATN2	0.4
PLAT	0.4
SGCA	0.4
CASC10	0.4
CLEC3B	0.4
PXDN	0.4
DGKE	0.4
AOC3	0.4
SH3PXD2A	0.4
KIAA0040	0.4
TRPM6	0.4
PLEKHH3	0.4
CCDC85A	0.4
ANGPT4	0.4
HECA	0.4
STAB1	0.4
SASH1	0.4
GJC2	0.4
VAX2	0.4
SERP2	0.4
FAM101B	0.4
CASP10	0.39
FUT1	0.39
MFGE8	0.39
PTPRE	0.39
SLC12A4	0.39
C11ORF88	0.39
PCGF2	0.39
STARD8	0.39
CTIF	0.39
BVES	0.39
FAM107A	0.39
TMEM173	0.39
GALNT18	0.39
TMEM150C	0.39
CMTM5	0.39
ASAP1	0.39
DTNBP1	0.39
PRR16	0.39
MAP1S	0.39
TRIM62	0.39
ANGPTL2	0.39
WFDC1	0.39
KIF26A	0.39
RXFP1	0.39
FAM129B	0.39
COL12A1	0.38
CPA3	0.38
CTGF	0.38
DYNC1I1	0.38
RAPGEF1	0.38
KCNC4	0.38
MYCN	0.38
NFATC1	0.38
NPY1R	0.38
NTRK3	0.38
CDK17	0.38
SERPINB6	0.38
RPL22	0.38
SCN4B	0.38
STC1	0.38
STK10	0.38
RGS7BP	0.38
PDE5A	0.38
ADAM15	0.38
ABCG2	0.38
ADAMTS2	0.38
SOCS5	0.38
CDC37	0.38
ZNF677	0.38
LINC00310	0.38
OR51E2	0.38
GDPD5	0.38
COL5A3	0.38
JPH4	0.38
COX4I2	0.38
ZNF532	0.38
ZFPM2	0.38
CTNNBIP1	0.38
DNM3	0.38
TRIB2	0.38
CFAP161	0.38
ANO3	0.38
PLEKHG2	0.38
CNST	0.37
ACTN4	0.37
DPYSL2	0.37
EPHA3	0.37
GNB1	0.37
LPAR4	0.37
JARID2	0.37
LTBP2	0.37
MAP3K3	0.37
PLN	0.37
CLEC11A	0.37
SLC6A9	0.37
TAF11	0.37
NR2F1	0.37
FAM69B	0.37
GRAPL	0.37
COL14A1	0.37
MICAL2	0.37
RAPGEF2	0.37
WASF2	0.37
INMT	0.37
RNASE10	0.37
CPED1	0.37
RELL1	0.37
APOL5	0.37
PRRT1	0.37
MOB2	0.37
DACT3	0.37
FGFBP2	0.37
FAM198B	0.37
MOV10L1	0.37
SMIM10	0.37
TMEM39B	0.37
CARD8	0.37
EOGT	0.37
SULF1	0.37
KIAA0922	0.37
PACS2	0.37
TSPAN15	0.37
LOC221122	0.37
PREX1	0.37
CCDC149	0.37
DLL1	0.37
LRRC10B	0.37
EHD3	0.37
ARVCF	0.36
BMP4	0.36
DCTN1	0.36
DLG4	0.36
ACKR1	0.36
GLI2	0.36
SMAD7	0.36
PCDH1	0.36
TLE2	0.36
TPM2	0.36
TPM4	0.36
SDPR	0.36
PLPP3	0.36
UNC5C	0.36
MPDZ	0.36
EFCAB14	0.36
SPRY2	0.36
RFX8	0.36
SOX21	0.36
FILIP1L	0.36
NRM	0.36
MMP28	0.36
SYT15	0.36
TAF3	0.36
INPP5K	0.36
PLEKHG5	0.36
WTIP	0.36
LDLRAD4	0.35
CASQ2	0.35
CENPB	0.35
DAPK3	0.35
DLX6	0.35
ECM2	0.35
ELF2	0.35
ELN	0.35
STOM	0.35
FLNA	0.35
GUCY1B3	0.35
CD200	0.35
PTPRG	0.35
RGL2	0.35
FAM219A	0.35
SPTBN1	0.35
TGFBR3	0.35
TIMP2	0.35
TNXB	0.35
ARHGEF2	0.35
FCHSD2	0.35
LRRC17	0.35
RAPGEF3	0.35
C1QTNF9	0.35
TMEM109	0.35
SH3TC2	0.35
TMEM121	0.35
KLHL5	0.35
SMU1	0.35
FRMD4A	0.35
ARHGEF40	0.35
FOXJ2	0.35
NFASC	0.35
PCDHAC2	0.35
PMEPA1	0.35
MKL2	0.35
ARHGEF26	0.35
AFAP1	0.35
HAPLN2	0.35
RP1L1	0.35
LMCD1	0.35
ADAD2	0.35
ZNF649	0.35
ACTA2	0.34
CD36	0.34
CIRBP	0.34
COL5A2	0.34
DLX3	0.34
DNASE1L3	0.34
HBEGF	0.34
GUCY1A3	0.34
HES1	0.34
PDE4B	0.34
MAPK11	0.34
RBMS1	0.34
RPGR	0.34
RPL36AL	0.34
TAGLN	0.34
FZD4	0.34
ASMTL	0.34
ARHGEF7	0.34
CACNA1H	0.34
MYL12A	0.34
NXPH3	0.34
ACER2	0.34
ARHGAP10	0.34
C1QTNF2	0.34
SLC45A1	0.34
IPO11	0.34
PPP1R9B	0.34
ZC3H10	0.34
ANTXR2	0.34
MIER2	0.34
PARVA	0.34
TBC1D2B	0.34
SSBP3	0.34
AMOTL1	0.34
RGMA	0.34
PLSCR4	0.34
C16ORF45	0.34
CPNE2	0.34
BAHCC1	0.34
SCGB3A1	0.34
LCN6	0.34
SPRED1	0.34
RBSN	0.34
CRTC3	0.34
ADRA2B	0.33
GYPE	0.33
MAP1A	0.33
MEOX1	0.33
CEP112	0.33
HNRNPM	0.33
ROBO2	0.33
TCF21	0.33
NR2F2	0.33
WNT6	0.33
WISP1	0.33
MAGI1	0.33
ADAMTS4	0.33
IP6K1	0.33
ZEB2	0.33
ARHGAP25	0.33
IFITM2	0.33
LYVE1	0.33
PKIG	0.33
GID4	0.33
FAM122A	0.33
DACT1	0.33
FAM213A	0.33
PARD6G	0.33
ATOH8	0.33
GPAT2	0.33
CNTN4	0.33
MLC1	0.33
TTC28	0.33
FJX1	0.33
NAV1	0.33
TSHZ3	0.33
KBTBD2	0.33
C17ORF82	0.33
PROB1	0.33
EMID1	0.33
INF2	0.33
EBF2	0.33
MTERF4	0.33
KANK4	0.33
ABL2	0.32
BMPR2	0.32
KLF9	0.32
VPS51	0.32
CDKN1C	0.32
COL3A1	0.32
DYNC1H1	0.32
ETS2	0.32
GPR1	0.32
KCNJ9	0.32
BCAM	0.32
MEIS2	0.32
MFAP3	0.32
MYL4	0.32
MYO1D	0.32
DENND6A	0.32
PDE3A	0.32
PDE1B	0.32
DNAJC18	0.32
MAP4K2	0.32
TACC1	0.32
UBTF	0.32
KCNAB1	0.32
FZD9	0.32
ITGA8	0.32
ADAM23	0.32
SOCS2	0.32
RASSF9	0.32
IER2	0.32
SPRY3	0.32
MYL9	0.32
PLK2	0.32
IRAK3	0.32
LOC440461	0.32
UBTD1	0.32
PRCD	0.32
ABTB1	0.32
SNX9	0.32
UBE2J1	0.32
ZNF853	0.32
KIRREL	0.32
ST6GALNAC1	0.32
CTTNBP2NL	0.32
PASK	0.32
KIF17	0.32
PDZD4	0.32
ZNF521	0.32
LDLRAP1	0.32
B3GALT6	0.32
LGALSL	0.32
FBXO39	0.32
PDLIM2	0.32
CERK	0.32
NT5DC2	0.32
EEF1DP3	0.32
AGTR1	0.31
ANXA6	0.31
CALD1	0.31
CAMK4	0.31
CBL	0.31
CRIP1	0.31
FOLH1	0.31
GGTA1P	0.31
GNAI1	0.31
HOXD10	0.31
INHBA	0.31
JUNB	0.31
MAP3K11	0.31
MMP2	0.31
DDR2	0.31
ODF2	0.31
CX3CL1	0.31
R3HCC1	0.31
SLC12A2	0.31
SNAI2	0.31
UVRAG	0.31
YWHAH	0.31
BRD3	0.31
TEAD2	0.31
CDC42BPA	0.31
TNFSF12	0.31
VAMP3	0.31
RASSF2	0.31
SPOCK2	0.31
AKT3	0.31
RASA4	0.31
FBLN5	0.31
LDB3	0.31
AKAP2	0.31
GPR182	0.31
CYBRD1	0.31
PLEKHO2	0.31
CXXC4	0.31
SP6	0.31
PRR3	0.31
GLT8D2	0.31
HDGFRP3	0.31
LINC00092	0.31
SH3GLB1	0.31
PRPF38A	0.31
ZIK1	0.31
NECAP2	0.31
SEPT8	0.31
PHLDB1	0.31
LURAP1L	0.31
TMEM181	0.31
ZNF835	0.31
SCARF2	0.31
LMOD1	0.31
NELFB	0.31
SGK223	0.31
AHDC1	0.31
C11ORF96	0.31
HES5	0.31
MUSTN1	0.31
SYNE3	0.31
POLR1E	0.31
DENND2C	0.31
APP	0.3
MTMR9	0.3
CA4	0.3
CDKN2D	0.3
CSRP1	0.3
CTSG	0.3
FOXC2	0.3
FMO3	0.3
GNGT2	0.3
HTR2B	0.3
CYR61	0.3
LMNA	0.3
MSI1	0.3
MYO1C	0.3
PTPRK	0.3
RXRA	0.3
TCF7L2	0.3
TIMP4	0.3
SYNPO2	0.3
SPOP	0.3
ADAM19	0.3
ASAP2	0.3
NREP	0.3
CDC42BPB	0.3
SOGA1	0.3
MXD4	0.3
SLC27A3	0.3
CCDC85B	0.3
RAB31	0.3
TMEM119	0.3
STEAP4	0.3
RERGL	0.3
ZNF671	0.3
ZNF34	0.3
INTS5	0.3
C1QTNF7	0.3
MOB3C	0.3
CCDC3	0.3
MEX3B	0.3
C2ORF40	0.3
CARD6	0.3
SMOX	0.3
SIGLEC17P	0.3
ODF3L2	0.3
ZNF416	0.3
ADGRL2	0.3
SMG6	0.3
RASD2	0.3
ZBTB42	0.3
TCEAL7	0.3
PPP1R14A	0.3
GIT1	0.3
PKNOX2	0.3
GPATCH3	0.3
TINAGL1	0.3
CDH24	0.3
ZNF781	0.3
ADD1	0.29
AKT1	0.29
RHOB	0.29
ATP1A2	0.29
BMP5	0.29
CBFA2T3	0.29
CD79B	0.29
EFNB1	0.29
GAB1	0.29
GSTM5	0.29
MEIS1	0.29
MMP15	0.29
MYH11	0.29
MYLK	0.29
PLA2G5	0.29
PLCG1	0.29
RING1	0.29
RPL11	0.29
SALL2	0.29
SLC16A2	0.29
SPTAN1	0.29
LYPD2	0.29
SVIL	0.29
TBCD	0.29
TNS1	0.29
ZFP37	0.29
MMP23B	0.29
PPT2	0.29
ARHGAP29	0.29
ZFP28	0.29
RASGRP2	0.29
POSTN	0.29
AP3M2	0.29
KLF12	0.29
TMEM240	0.29
SLC35E4	0.29
LINC00152	0.29
LINC00924	0.29
ZNF583	0.29
HVCN1	0.29
FAM109B	0.29
MEDAG	0.29
TOX2	0.29
ZNF518B	0.29
RNF38	0.29
A4GALT	0.29
RASSF3	0.29
GJC3	0.29
TBC1D13	0.29
MMRN1	0.29
CYP26B1	0.29
TTLL10	0.29
ARHGAP20	0.29
PRX	0.29
HMHB1	0.29
CTDSP1	0.29
SHC2	0.29
ANKRD40	0.29
ZNF549	0.29
TTLL11	0.29
LRRC4B	0.29
PODN	0.29
ST6GALNAC6	0.29
CDR2L	0.29
ADORA2A	0.28
ADRA2A	0.28
BNIP2	0.28
DRD1	0.28
FCGRT	0.28
FOXL1	0.28
PRICKLE2	0.28
HOXD3	0.28
CD99	0.28
ZNF467	0.28
NFIA	0.28
PRELP	0.28
PYGM	0.28
RAP2A	0.28
RASGRF2	0.28
ROBO1	0.28
SORT1	0.28
SCN4A	0.28
CLIP2	0.28
ZNF35	0.28
LTBP4	0.28
SORBS2	0.28
LDLRAD2	0.28
CRLF1	0.28
PIWIL1	0.28
TAOK2	0.28
HCG9	0.28
GAS2L1	0.28
STON1	0.28
WDR25	0.28
NANOS3	0.28
NDEL1	0.28
OSBPL5	0.28
CRISPLD2	0.28
FAM129A	0.28
IER5	0.28
ZNF559	0.28
SLC16A14	0.28
NRDE2	0.28
BTNL9	0.28
FAM46A	0.28
STK38L	0.28
CSGALNACT1	0.28
DENND5A	0.28
REXO4	0.28
TMEM59L	0.28
SYF2	0.28
LRRTM2	0.28
MYADM	0.28
OSTF1	0.28
ZNF788	0.28
NKX2-3	0.28
C9ORF153	0.28
ZBTB8A	0.28
IRF2BPL	0.28
ACTN1	0.27
CHD3	0.27
DPT	0.27
DUSP1	0.27
FAP	0.27
GAP43	0.27
GP9	0.27
IRAK2	0.27
LPL	0.27
MDFI	0.27
OPHN1	0.27
CFP	0.27
SEPT5	0.27
HTRA1	0.27
THBD	0.27
C9ORF85	0.27
ZNF154	0.27
SPARCL1	0.27
TMEM242	0.27
DCAF5	0.27
LARGE	0.27
RPS6KA5	0.27
FEZ2	0.27
SUSD6	0.27
MAML1	0.27
P2RY14	0.27
MED12	0.27
TSHZ1	0.27
IFITM3	0.27
SFTA1P	0.27
SEMA6C	0.27
TRIM3	0.27
GMEB1	0.27
VAMP5	0.27
FERMT2	0.27
ATF7	0.27
TRIOBP	0.27
AKAP13	0.27
RIN3	0.27
C8ORF58	0.27
CAMKK1	0.27
HOPX	0.27
FNDC1	0.27
PLPP7	0.27
ORAI1	0.27
C1ORF198	0.27
CYTL1	0.27
C1ORF123	0.27
C9ORF40	0.27
EVA1B	0.27
TTLL5	0.27
N4BP3	0.27
BICD2	0.27
SRGAP2	0.27
MACF1	0.27
ZNF30	0.27
ARID1B	0.27
MTUS1	0.27
KCTD20	0.27
RCSD1	0.27
LOXHD1	0.27
IL17B	0.27
NKIRAS2	0.27
SERTAD1	0.27
PHLDB3	0.27
ACVR2A	0.26
RHOA	0.26
CD81	0.26
SEPT7	0.26
CHN1	0.26
DLX2	0.26
GEM	0.26
GLI1	0.26
BRF1	0.26
HDC	0.26
HLA-E	0.26
ID1	0.26
ITGB5	0.26
LASP1	0.26
MCC	0.26
MAP3K4	0.26
SAMD14	0.26
NEDD9	0.26
PDGFA	0.26
PLCB3	0.26
PPP3CC	0.26
PSMC1	0.26
PTPN12	0.26
SIPA1	0.26
SP2	0.26
ST8SIA4	0.26
ZNF286B	0.26
DYRK3	0.26
NAALAD2	0.26
CTDSP2	0.26
ADIRF	0.26
NUDT3	0.26
RASSF1	0.26
CLMN	0.26
RNF122	0.26
SVEP1	0.26
TUBA3FP	0.26
FAM49A	0.26
ADAMTS12	0.26
VANGL1	0.26
EPB41L4A-AS1	0.26
ZNF618	0.26
GCSAML	0.26
PRRC2B	0.26
BUD13	0.26
MGC16275	0.26
HMGCLL1	0.26
ZRANB1	0.26
DAB2IP	0.26
BORCS6	0.26
CASC3	0.26
PALLD	0.26
TRERF1	0.26
PDS5B	0.26
RCOR1	0.26
ZNF660	0.26
PHLPP1	0.26
PCDHB4	0.26
NUP188	0.26
ISY1	0.26
NTAN1	0.26
FAM19A5	0.26
DNAJB5	0.26
EPC2	0.26
TINF2	0.26
MESDC1	0.26
GJD3	0.26
CPAMD8	0.26
CHMP4A	0.26
LINC00312	0.26
KIF13A	0.26
AAED1	0.26
RMND5A	0.26
COL1A2	0.25
PABPC4L	0.25
FAM171B	0.25
EDN1	0.25
EXTL2	0.25
FOLR2	0.25
FOS	0.25
CCR10	0.25
H3F3B	0.25
HNRNPD	0.25
JUND	0.25
KRT14	0.25
MAP2	0.25
MMP11	0.25
MPZ	0.25
MDGA1	0.25
PALM	0.25
PGF	0.25
PLD1	0.25
PLS3	0.25
PTPRR	0.25
PVRL2	0.25
SRSF3	0.25
SMARCA2	0.25
SOD3	0.25
VAMP2	0.25
TCEB3	0.25
TRAF6	0.25
VIP	0.25
WNT9B	0.25
SLC30A3	0.25
MBNL1-AS1	0.25
SYN3	0.25
ARID1A	0.25
NCK2	0.25
ITGA10	0.25
ITGBL1	0.25
ZNF358	0.25
ROCK2	0.25
ZBTB39	0.25
KHDRBS1	0.25
LILRB5	0.25
MID2	0.25
C10ORF10	0.25
AP4S1	0.25
EXOC3	0.25
ARMC5	0.25
C12ORF57	0.25
ITM2C	0.25
CNPY4	0.25
MARCH3	0.25
ZNF879	0.25
GMPR2	0.25
KLF13	0.25
ZAK	0.25
PTPN5	0.25
C9ORF3	0.25
DISP1	0.25
OLFML1	0.25
CHST12	0.25
CHSY1	0.25
DENND3	0.25
SNW1	0.25
EXOSC2	0.25
ZNF454	0.25
LDOC1	0.25
FLRT2	0.25
MARCH4	0.25
MKL1	0.25
C6ORF89	0.25
PRSS30P	0.25
SCUBE3	0.25
CHMP7	0.25
INAFM1	0.25
AGO1	0.25
C5AR2	0.25
MYOCD	0.25
C2CD4C	0.25
DGKH	0.25
SLC22A23	0.25
LRRC4	0.25
PLPPR2	0.25
ADRA1A	0.24
CDH8	0.24
DMWD	0.24
EPHA4	0.24
EPHB6	0.24
GYPC	0.24
HMGN2	0.24
KCNMB1	0.24
LRP4	0.24
NPAS4	0.24
PTCH1	0.24
PTMS	0.24
PTPRN2	0.24
RBM4	0.24
SARS	0.24
SFTPD	0.24
SOX4	0.24
ADAMTS18	0.24
TCEA2	0.24
TEF	0.24
TGFB2	0.24
THRA	0.24
TIAM1	0.24
TSHR	0.24
FAM9C	0.24
ENC1	0.24
KCNK5	0.24
ZFP92	0.24
S1PR4	0.24
KCNK6	0.24
ADAMTS1	0.24
RGS6	0.24
MED6	0.24
KAT5	0.24
ANP32B	0.24
RASL10A	0.24
MTMR9LP	0.24
LINC01140	0.24
LENG1	0.24
OVCH1	0.24
EPC1	0.24
CD276	0.24
THSD7B	0.24
ZNF578	0.24
ARHGEF25	0.24
ANKRD35	0.24
PCDH11Y	0.24
HOOK3	0.24
CHMP3	0.24
KIAA1755	0.24
DDI1	0.24
GPR85	0.24
EPB41L4A-AS2	0.24
DNAJC17	0.24
PBRM1	0.24
ANKRD34A	0.24
DHRS4L2	0.24
ZNF407	0.24
RPIA	0.24
ERC1	0.24
KHNYN	0.24
ANKH	0.24
RNF20	0.24
DCBLD1	0.24
PRSS3P2	0.24
CAMK1G	0.24
SLC12A5	0.24
KRT6C	0.24
BEGAIN	0.24
PLEKHA4	0.24
SHF	0.24
NGDN	0.24
SETBP1	0.24
RAI14	0.24
LIN52	0.24
DKK2	0.24
HTRA2	0.24
ZNF543	0.24
C14ORF93	0.24
AAMDC	0.24
C1ORF216	0.24
GLTSCR2	0.24
SMURF2	0.24
CBLB	0.23
CCND3	0.23
CLIC2	0.23
COL16A1	0.23
CSNK1E	0.23
FKBP1AP1	0.23
GNG7	0.23
GSTA4	0.23
LSM11	0.23
LMX1A	0.23
TM4SF1	0.23
NPY	0.23
NOV	0.23
NPR1	0.23
NRF1	0.23
PDE9A	0.23
PPP3CA	0.23
PRKACA	0.23
PTPRM	0.23
PVRL1	0.23
RAB13	0.23
RARA	0.23
RIT2	0.23
S100A3	0.23
TGFB3	0.23
TLL1	0.23
CARMN	0.23
YES1	0.23
ZFP36	0.23
ZNF134	0.23
MALL	0.23
KAT6A	0.23
USP13	0.23
MTA1	0.23
PDLIM7	0.23
CTCFL	0.23
CD302	0.23
ARID5A	0.23
LOC143666	0.23
SNIP1	0.23
MCTP1	0.23
TCEAL4	0.23
SLC35G2	0.23
VILL	0.23
KLF3	0.23
L3MBTL3	0.23
TMEM91	0.23
TUBB6	0.23
CLDN22	0.23
GPR137C	0.23
GDPD2	0.23
ZNF615	0.23
PHLDA1	0.23
RADIL	0.23
SYT11	0.23
ZC3H4	0.23
DNMBP	0.23
ADGRL3	0.23
PCDHB12	0.23
WRNIP1	0.23
XAB2	0.23
KBTBD6	0.23
KIAA1147	0.23
SLC45A4	0.23
FRMD6	0.23
ZNF286A	0.23
ZNF304	0.23
EMILIN3	0.23
ZBTB4	0.23
CHD8	0.23
PXDC1	0.23
DLGAP3	0.23
DSTYK	0.23
ZNF830	0.23
SZRD1	0.23
IRF2BP1	0.23
CACNG8	0.23
C17ORF49	0.23
DUSP27	0.23
MRFAP1	0.23
YPEL1	0.23
TFPT	0.23
RBM15B	0.23
EFEMP2	0.23
KBTBD13	0.23
FAM134C	0.23
CSRNP1	0.23
ZSWIM4	0.23
AQP1	0.22
ART4	0.22
TMEM108	0.22
BFSP1	0.22
SIGLEC6	0.22
CDH10	0.22
CDK9	0.22
LSMEM2	0.22
COL13A1	0.22
CSNK2B	0.22
EEF1D	0.22
EPB41L1	0.22
ETV3	0.22
EXT2	0.22
EXTL1	0.22
GATA2	0.22
HIVEP2	0.22
HNRNPA1	0.22
HOXD8	0.22
IGFBP4	0.22
TCTEX1D1	0.22
ILK	0.22
LINC00094	0.22
NAP1L5	0.22
NASP	0.22
NDN	0.22
PER1	0.22
PPP1R8	0.22
PKN1	0.22
PTMA	0.22
RPL34	0.22
SLC5A4	0.22
SLC6A1	0.22
NAIF1	0.22
SRF	0.22
SSTR1	0.22
SURF6	0.22
THBS1	0.22
VEGFA	0.22
ZNF22	0.22
ZSCAN20	0.22
ANKRD19P	0.22
ZNF45	0.22
ZNF155	0.22
PPM1D	0.22
IFITM1	0.22
LMO4	0.22
DEDD	0.22
ZNF516	0.22
TOX4	0.22
PPP4R1	0.22
HNRNPA0	0.22
LINC00936	0.22
EMILIN1	0.22
FSTL1	0.22
CWF19L2	0.22
MFSD11	0.22
SVBP	0.22
ZNF703	0.22
WDR82	0.22
SEL1L2	0.22
EGFL8	0.22
RAB3C	0.22
RBM4B	0.22
IFI27L2	0.22
ARMCX1	0.22
MICALL1	0.22
UBALD2	0.22
LINC00324	0.22
MFSD6	0.22
TOR4A	0.22
UBE2R2	0.22
LINC00176	0.22
DOLK	0.22
ZNF641	0.22
SPATA7	0.22
SYNM	0.22
TPSD1	0.22
PRPF6	0.22
MEIS3	0.22
ZNFX1	0.22
DEGS2	0.22
KLHL33	0.22
HES4	0.22
CHURC1	0.22
SNHG5	0.22
SKIDA1	0.22
CC2D2B	0.22
CCDC102A	0.22
MVB12A	0.22
TPRG1L	0.22
USP27X	0.22
STRN4	0.22
OTUD7A	0.22
ITPRIPL2	0.22
ELFN1	0.22
IRF2BP2	0.22
AP2A2	0.21
ATP2B4	0.21
SNAI3-AS1	0.21
C7	0.21
CACNA1A	0.21
CCND2	0.21
COL1A1	0.21
COL6A2	0.21
DYNC1I2	0.21
EFNA1	0.21
EGR1	0.21
EGR3	0.21
EYA4	0.21
FDPS	0.21
FGF13	0.21
HRH1	0.21
KRT1	0.21
KRT6B	0.21
KRT16	0.21
MARCKS	0.21
MGMT	0.21
MOCS1	0.21
MYH10	0.21
NFKBIA	0.21
NOS2	0.21
NUMA1	0.21
PCDHGC3	0.21
PGM5	0.21
PTGER1	0.21
RBP1	0.21
DPF2	0.21
RFX3	0.21
ROCK1	0.21
RPL5	0.21
RPL21	0.21
RPS28	0.21
SKIL	0.21
SPRR2F	0.21
STXBP1	0.21
SURF2	0.21
TLE1	0.21
TMSB4XP8	0.21
SSR4P1	0.21
VIM	0.21
VIPR1	0.21
ZNF8	0.21
RNF112	0.21
CSDE1	0.21
NCOA3	0.21
MBL1P	0.21
DGKD	0.21
CDC14A	0.21
EDF1	0.21
CTNNAL1	0.21
TSC22D1	0.21
H1FX	0.21
SEMA5A	0.21
PDLIM1	0.21
MTA2	0.21
PNMA1	0.21
BCL7C	0.21
NMT2	0.21
ITM2A	0.21
TRAM2	0.21
FAM65B	0.21
TBKBP1	0.21
RNF144A	0.21
SLC23A2	0.21
TSSC4	0.21
EFS	0.21
HMGB1P1	0.21
SRSF8	0.21
GTF2A1L	0.21
PTPRT	0.21
C19ORF43	0.21
ZFYVE21	0.21
C1ORF50	0.21
HNRNPA1L2	0.21
CSRNP3	0.21
VOPP1	0.21
C19ORF18	0.21
ZNF484	0.21
UTP11L	0.21
ZNF580	0.21
PLEKHO1	0.21
LRRC71	0.21
ATRIP	0.21
CHD6	0.21
NCKIPSD	0.21
FAM120B	0.21
COL25A1	0.21
ZNF577	0.21
TNKS1BP1	0.21
FAM84A	0.21
BCL11A	0.21
FAM195B	0.21
LINC01128	0.21
SH3TC1	0.21
LYPD5	0.21
IZUMO1	0.21
SOBP	0.21
C12ORF54	0.21
BRK1	0.21
ZNF25	0.21
BACE1	0.21
AGPAT4	0.21
WDR34	0.21
TSPAN18	0.21
ZNF551	0.21
FAM160B1	0.21
BMP8A	0.21
CCDC69	0.21
NEK9	0.21
GNG8	0.21
MDS2	0.21
SCHIP1	0.21
FAM228A	0.21
VIPAS39	0.21
EXO5	0.21
ABL1	0.2
ACTG2	0.2
APEX1	0.2
ARHGDIA	0.2
CAV3	0.2
SERPINH1	0.2
CDH4	0.2
CREBBP	0.2
CST6	0.2
CTNND1	0.2
DPYSL3	0.2
EDA	0.2
PHC1	0.2
ELAVL3	0.2
ERF	0.2
FABP5	0.2
FOXO3B	0.2
MROH2B	0.2
GNG11	0.2
GP2	0.2
GRM2	0.2
GRM3	0.2
HPVC1	0.2
HRAS	0.2
HSPA1L	0.2
IFNAR1	0.2
KIFC3	0.2
KRT6A	0.2
LTC4S	0.2
MAP1B	0.2
MAP6	0.2
PPP1R12B	0.2
PNP	0.2
NTF3	0.2
NTHL1	0.2
RALGDS	0.2
SSBP4	0.2
SPRR2D	0.2
TAF5	0.2
TIMP1	0.2
TSPAN7	0.2
C9ORF135	0.2
U2AF1	0.2
FAM177B	0.2
BRPF1	0.2
RASA4CP	0.2
KLF7	0.2
B3GALT4	0.2
INPP4B	0.2
WDR46	0.2
CROCC	0.2
SV2A	0.2
CCS	0.2
NAALADL1	0.2
ABI2	0.2
TUBGCP3	0.2
ZNF211	0.2
DHRS4	0.2
C1QL4	0.2
HNRNPUL1	0.2
PSIP1	0.2
SUPT16H	0.2
CLEC4G	0.2
LDLRAD3	0.2
BEX5	0.2
EGLN2	0.2
SAP30L	0.2
ZNF773	0.2
BAIAP2-AS1	0.2
WDR89	0.2
EEPD1	0.2
ABHD17A	0.2
GPRASP2	0.2
MRFAP1L1	0.2
LINC00314	0.2
RIOK1	0.2
UBXN1	0.2
SSUH2	0.2
NOSIP	0.2
CRIM1	0.2
WDR54	0.2
CHST15	0.2
ZNF347	0.2
ZNF496	0.2
XXYLT1	0.2
PCDHB18P	0.2
RNF125	0.2
ZFP82	0.2
TMEM57	0.2
ZNF510	0.2
RBM22	0.2
CCDC94	0.2
LAMB2P1	0.2
ARHGAP15	0.2
UNC45A	0.2
CCNY	0.2
DMAP1	0.2
ADSSL1	0.2
C10ORF25	0.2
HNRNPA3	0.2
PELI1	0.2
LOC646999	0.2
LOC90246	0.2
ZNF624	0.2
NCOA5	0.2
C6ORF47	0.2
GSTTP1	0.2
WWTR1	0.2
FAM50B	0.2
CYB5D2	0.2
TMEM233	0.2
FRMD3	0.2
CDH26	0.2
HSPB9	0.2
ZNF704	0.2
MRGPRX1	0.2
ARL5C	0.2
RNF25	0.2
C18ORF54	0.2
APBB1	0.19
PHOX2A	0.19
ARNT	0.19
ZSCAN18	0.19
AVPR2	0.19
BCL2L2	0.19
MLKL	0.19
FOXN3	0.19
AP2S1	0.19
CYP4B1	0.19
DSG3	0.19
EPHA2	0.19
EMX2	0.19
GABRR1	0.19
GNA12	0.19
HCRTR1	0.19
HOXD4	0.19
INPP5B	0.19
ITGA2	0.19
KIR2DS4	0.19
KIR3DL1	0.19
LCA5	0.19
MTHFR	0.19
MYL6	0.19
PPP1R12A	0.19
NFKBIL1	0.19
NONO	0.19
NPY5R	0.19
CLDN11	0.19
PBX1	0.19
PMP22	0.19
PPP2R5C	0.19
MAP2K3	0.19
PTEN	0.19
RPLP2	0.19
SAG	0.19
SCTR	0.19
SNTB2	0.19
SPRR1B	0.19
TTF1	0.19
UMOD	0.19
LOC728392	0.19
DHRS4L1	0.19
CXCR4	0.19
C4ORF48	0.19
SUPT3H	0.19
EIF4G3	0.19
BCL10	0.19
SOCS3	0.19
GABBR2	0.19
ISG15	0.19
KIAA0586	0.19
THRAP3	0.19
TNK2	0.19
CAP1	0.19
PDLIM5	0.19
IVNS1ABP	0.19
FARS2	0.19
MAGED2	0.19
EHMT2	0.19
FKBP9	0.19
LOC340017	0.19
PABPC1L2A	0.19
METTL16	0.19
GSC	0.19
SEMA6D	0.19
PRR35	0.19
FAM127C	0.19
TOE1	0.19
NETO1	0.19
TMEM132B	0.19
ZNF524	0.19
ZNF542P	0.19
ZNF501	0.19
WDFY2	0.19
ZNF653	0.19
KLHDC3	0.19
POLR3GL	0.19
ZCCHC17	0.19
B3GNT9	0.19
[truncated: 18,436 more rows]

## Sheet: LGG
ESAM	0.91
ROBO4	0.88
MMRN2	0.86
ARHGEF15	0.85
CDH5	0.84
MYCT1	0.83
CD34	0.81
TM4SF18	0.81
CLEC14A	0.81
ERG	0.78
ADGRL4	0.77
CXORF36	0.76
ECSCR	0.76
FGD5	0.76
NOS3	0.75
FOXS1	0.74
VWF	0.74
CYYR1	0.74
PECAM1	0.73
SLC38A5	0.73
ICAM2	0.72
SCARF1	0.72
NDUFA4L2	0.72
BCL6B	0.72
ADCY4	0.71
EMCN	0.71
ADGRA2	0.71
FLT4	0.7
GJA4	0.7
GPR4	0.7
CCM2L	0.7
HSPA12B	0.7
GRAP	0.69
NOTCH4	0.68
TGM2	0.67
ABCG2	0.67
FOXL2	0.66
GNG11	0.66
ABCB1	0.66
ITM2A	0.66
RASIP1	0.66
LXN	0.66
ADGRF5	0.66
ENG	0.64
ENPEP	0.64
MECOM	0.64
MAGEA12	0.64
FOXL2NB	0.64
PROCR	0.64
CLEC1A	0.64
MYLK2	0.64
LRRC32	0.63
KDR	0.63
HYAL2	0.63
FOXF2	0.62
ITGA1	0.62
TIE1	0.62
DLL4	0.62
LINC00961	0.62
SLCO2A1	0.61
CLDN5	0.61
CSAG1	0.6
SOX17	0.6
IL3RA	0.59
NOSTRIN	0.59
SHE	0.59
ACE	0.58
AFAP1L1	0.58
MYO1B	0.58
LAMC3	0.58
TMEM204	0.58
PEAR1	0.58
FLT1	0.57
PTGIR	0.57
EXOC3L1	0.57
TINAGL1	0.57
FOXF1	0.56
IFI27	0.56
HIGD1B	0.56
MFSD2A	0.56
SOX18	0.56
CD93	0.56
SPINK8	0.56
FAM26E	0.56
HRC	0.55
MCAM	0.55
SMTN	0.55
ASB9	0.55
CD320	0.55
ANGPT2	0.54
FAM43A	0.54
SGCA	0.54
TCN2	0.54
FHL5	0.54
MPZL2	0.54
LINC00924	0.54
PRKCH	0.53
SLC38A11	0.53
SEMA3G	0.53
ACTA2	0.52
CETP	0.52
EPAS1	0.52
ITGA5	0.52
BCAM	0.52
PVRL2	0.52
SLC9A3R2	0.52
DOCK6	0.52
SLC39A8	0.52
ACTN4	0.51
CDA	0.51
ZNF366	0.51
LAMC1	0.51
MYH9	0.51
LINC01139	0.51
C1QTNF7	0.51
COBLL1	0.51
SUSD2	0.51
ANPEP	0.5
SOX7	0.5
PCDH12	0.5
TRPM4	0.5
FOXQ1	0.5
TMEM92	0.5
CASP10	0.49
COL4A2	0.49
FOXC1	0.49
HSPG2	0.49
MYO1C	0.49
PRKCDBP	0.49
FAM124B	0.49
EOGT	0.49
THSD1	0.49
TNFRSF4	0.48
ITIH5	0.48
CDC42EP5	0.48
A4GALT	0.48
GIPC3	0.48
COL4A1	0.47
GGT5	0.47
MATN3	0.47
FZD4	0.47
ADAMTS1	0.47
FAM110D	0.47
KLHL30	0.47
USHBP1	0.47
LEF1	0.47
CALD1	0.46
GIMAP7	0.46
NOTCH3	0.46
PDGFRB	0.46
PODXL	0.46
SLC2A1	0.46
TAGLN	0.46
TSPAN4	0.46
NOX4	0.46
RHOJ	0.46
HCAR1	0.46
SERPINH1	0.45
ECM1	0.45
FOXL1	0.45
XPNPEP2	0.45
PALM2-AKAP2	0.45
TMEM2	0.45
MRPL17	0.45
BGN	0.44
CDH6	0.44
MALL	0.44
RGS5	0.44
P2RY14	0.44
RAMP2	0.44
OR2A9P	0.44
TES	0.44
MMP25	0.44
ACTG2	0.43
GTF2E2	0.43
LAMA2	0.43
TM4SF1	0.43
CARMN	0.43
AOC3	0.43
HAPLN3	0.43
PKN3	0.43
EDN3	0.42
GJA5	0.42
RAET1E	0.42
NDUFA7	0.42
ATP8B1	0.42
TPM4	0.42
TNFSF10	0.42
GJC1	0.42
VWA2	0.42
SLC52A3	0.42
CD248	0.42
KANK3	0.42
BAX	0.41
DPEP1	0.41
GPER1	0.41
GRAPL	0.41
ARHGAP29	0.41
KLF2	0.41
C1ORF54	0.41
MRPS18A	0.41
CARD10	0.41
EHD2	0.41
ADGRE5	0.4
CTGF	0.4
FLI1	0.4
HIC1	0.4
ICAM3	0.4
ILK	0.4
ITGB1	0.4
LMO2	0.4
ITGA10	0.4
MYL12A	0.4
RNASE10	0.4
SLC52A2	0.4
COL18A1	0.4
EGFL8	0.4
MRPL14	0.4
ACVR1	0.39
CA5A	0.39
CD151	0.39
CLIC1	0.39
INSR	0.39
ABCB4	0.39
TGFB1I1	0.39
STARD8	0.39
SFTA1P	0.39
OR51E1	0.39
RELL1	0.39
RPF2	0.39
PELO	0.39
PTRF	0.39
LRRC70	0.39
MYDGF	0.39
ADGRL2	0.39
HRCT1	0.39
PRDM1	0.38
BSG	0.38
ECE1	0.38
EDN1	0.38
OLFML2A	0.38
PVR	0.38
RBMS2	0.38
S100A4	0.38
CCL14	0.38
TBX3	0.38
ADAM15	0.38
NRP1	0.38
ST8SIA6	0.38
KDELR1	0.38
KRT17P5	0.38
LINC00152	0.38
ATP8B3	0.38
MIXL1	0.38
TRIAP1	0.38
ACSL5	0.38
FBLIM1	0.38
ATF5	0.38
HEG1	0.38
TRIB3	0.38
HTRA3	0.38
PARVB	0.38
FAM3D	0.37
HPGD	0.37
NME2	0.37
P4HB	0.37
PRG2	0.37
TNFAIP6	0.37
SPRY1	0.37
LMAN2	0.37
UQCR11	0.37
CRNN	0.37
TARP	0.37
TMEM255B	0.37
LBX2-AS1	0.37
TMEM45B	0.37
CHST12	0.37
ZP1	0.37
RRP8	0.37
PLSCR3	0.37
KANK2	0.37
RNF144B	0.37
ARAP3	0.37
ARF6	0.36
CD63	0.36
CNN1	0.36
COL6A2	0.36
C4ORF32	0.36
EIF5A	0.36
IGFBP1	0.36
EIF6	0.36
ITIH3	0.36
LGALS3	0.36
NODAL	0.36
RRAS	0.36
ST3GAL1	0.36
PHLDA2	0.36
CLPP	0.36
TBX18	0.36
TBRG4	0.36
TMED1	0.36
PTP4A3	0.36
FZD10	0.36
TXNDC5	0.36
MRPL4	0.36
PLA1A	0.36
FAM109B	0.36
LINC00346	0.36
WIPI1	0.36
ANO1	0.36
GIMAP5	0.36
SBNO2	0.36
PLEK2	0.36
ERICH4	0.36
SMOC2	0.36
NAGS	0.36
P3H1	0.36
ATP5E	0.35
BMX	0.35
CRIP1	0.35
EIF4EBP1	0.35
NR5A2	0.35
GPR20	0.35
IGFBP4	0.35
LAMA4	0.35
PHB	0.35
RGS3	0.35
CLEC11A	0.35
SLC3A2	0.35
SNRPD2	0.35
SVIL	0.35
TBXA2R	0.35
THBD	0.35
CLEC3B	0.35
VASP	0.35
SLC7A5	0.35
FCN3	0.35
SH2D3C	0.35
PRDX4	0.35
P3H4	0.35
RAB43	0.35
ELOVL7	0.35
SLC19A3	0.35
LBH	0.35
BCL2L12	0.35
HDAC7	0.35
LSR	0.35
FKBP7	0.35
MPV17L2	0.35
NOP10	0.35
PLXND1	0.35
EXOC3L2	0.35
R3HDM4	0.35
TIMM8B	0.35
SULT1B1	0.35
JAG1	0.34
CASP4	0.34
COL6A1	0.34
COX8A	0.34
CPD	0.34
SLC26A2	0.34
HBEGF	0.34
DUSP5	0.34
EPHB4	0.34
FKBP1A	0.34
HMOX1	0.34
HTR1F	0.34
IGFBP3	0.34
JAG2	0.34
LGALS1	0.34
NDUFS6	0.34
NUCB1	0.34
PDGFB	0.34
PSMA1	0.34
MRPS12	0.34
SNRPB	0.34
TBCA	0.34
TFRC	0.34
TIMP1	0.34
ZYX	0.34
PDE5A	0.34
RNF7	0.34
CLEC2B	0.34
CCL26	0.34
IFITM3	0.34
TIMM44	0.34
IFITM2	0.34
KDELR3	0.34
ESM1	0.34
OR51E2	0.34
EMILIN2	0.34
POMP	0.34
C19ORF48	0.34
LBX2	0.34
UBALD2	0.34
METRNL	0.34
MARVELD2	0.34
OAF	0.34
OSTC	0.34
RPL36	0.34
ZNRD1	0.34
MRPL36	0.34
ATP2A3	0.33
BCL3	0.33
BTG1	0.33
DSP	0.33
EPS8	0.33
F10	0.33
FGR	0.33
HLA-A	0.33
ITPR3	0.33
LMNA	0.33
FBXO22-AS1	0.33
MGST2	0.33
MMP2	0.33
MYL6	0.33
NID1	0.33
PFN1	0.33
PRKCSH	0.33
MAP2K3	0.33
PSMB3	0.33
PTGER1	0.33
MRPL12	0.33
RPN1	0.33
TAF10	0.33
VEGFA	0.33
VEGFC	0.33
TMEM11	0.33
DOK2	0.33
BCAP31	0.33
CRTAP	0.33
VAMP5	0.33
SEC61B	0.33
EMILIN1	0.33
VKORC1	0.33
TMEM179B	0.33
CCDC102B	0.33
NDUFA13	0.33
ASPN	0.33
PINX1	0.33
EVA1B	0.33
UNC45A	0.33
SAMM50	0.33
BACE2	0.33
TMEM44	0.33
C19ORF70	0.33
TDRD10	0.33
MRPS18B	0.33
C19ORF53	0.33
SLC43A3	0.33
PHPT1	0.33
PLIN2	0.32
CDC25B	0.32
COL5A2	0.32
COX6B1	0.32
GUSB	0.32
GYS1	0.32
GGN	0.32
PRMT1	0.32
ICAM1	0.32
IGFBP2	0.32
KIR3DL1	0.32
NDUFB7	0.32
NEU1	0.32
PRF1	0.32
MYL12B	0.32
PSMA7	0.32
PTX3	0.32
RELB	0.32
RPS19	0.32
SCO1	0.32
SDCBP	0.32
SHMT2	0.32
TEAD3	0.32
TNFRSF10D	0.32
ROMO1	0.32
DPP3	0.32
NAMPT	0.32
DLEU1	0.32
TRAPPC2B	0.32
RPL35	0.32
NRM	0.32
APOLD1	0.32
CAPN12	0.32
GRWD1	0.32
HMCN1	0.32
RNF181	0.32
TRMT112	0.32
FAM96B	0.32
C15ORF48	0.32
LSM7	0.32
NKD2	0.32
MIER2	0.32
PIM3	0.32
GATAD2A	0.32
LRRC36	0.32
H2AFJ	0.32
ST6GALNAC1	0.32
NCLN	0.32
PLXDC1	0.32
ATP10A	0.32
PRKD2	0.32
RAI14	0.32
LATS2	0.32
MRPL15	0.32
NXT1	0.32
FHOD1	0.32
ATP1B3	0.31
COL5A1	0.31
CSTB	0.31
DCN	0.31
NR2F6	0.31
ESRRA	0.31
MCEMP1	0.31
HEXB	0.31
MMP11	0.31
MPV17	0.31
MUC7	0.31
PPIB	0.31
PPIC	0.31
PSMB1	0.31
SNRPB2	0.31
SNRPC	0.31
SPTA1	0.31
SSR2	0.31
STK10	0.31
PXDNL	0.31
TPM1	0.31
IFRD2	0.31
MANF	0.31
CENPP	0.31
TAGLN2	0.31
CMAHP	0.31
CFLAR	0.31
GDF15	0.31
HS3ST3A1	0.31
DRAP1	0.31
EIF5AL1	0.31
TMEM223	0.31
URM1	0.31
CTHRC1	0.31
F11R	0.31
FRMD8	0.31
PAM16	0.31
MRPL2	0.31
EGFL7	0.31
ATRAID	0.31
WDR83OS	0.31
TMEM101	0.31
DNAJB11	0.31
SYDE1	0.31
RBPMS2	0.31
OST4	0.31
MRPL39	0.31
TMEM161A	0.31
CHSY1	0.31
EDEM2	0.31
KCNE4	0.31
NTAN1	0.31
TSKU	0.31
CD300LB	0.31
TIMM13	0.31
CHMP4C	0.31
DKK2	0.31
TRAPPC5	0.31
MVB12A	0.31
WTIP	0.31
NR2C2AP	0.31
ADM	0.3
SLC25A5	0.3
MLKL	0.3
CAV2	0.3
EPHA2	0.3
FOXC2	0.3
GZMB	0.3
IGFBP7	0.3
LEPR	0.3
MDH2	0.3
MYL4	0.3
NDUFV3	0.3
NPR1	0.3
CFP	0.3
POLRMT	0.3
PKIB	0.3
PSMA3	0.3
PSMD8	0.3
PTBP1	0.3
RAD23A	0.3
RPL8	0.3
RPL12	0.3
RPL27A	0.3
RPL29	0.3
RPL41	0.3
RPS15	0.3
RPS17	0.3
SAT1	0.3
SDHD	0.3
SELP	0.3
TWIST1	0.3
UBA52	0.3
ADAM12	0.3
KLF11	0.3
S1PR4	0.3
ADAM19	0.3
RRP9	0.3
OSMR	0.3
EFTUD2	0.3
LONP1	0.3
COX5A	0.3
MVP	0.3
TRAP1	0.3
IFI30	0.3
TOMM40	0.3
IL24	0.3
LILRA3	0.3
CHPF	0.3
SMIM4	0.3
MIR155HG	0.3
SF3B5	0.3
EMC6	0.3
CALHM2	0.3
QRFPR	0.3
TUBB6	0.3
TUBA1C	0.3
ABHD14B	0.3
CGNL1	0.3
RASSF3	0.3
EPS8L1	0.3
IKBIP	0.3
SPIC	0.3
GPCPD1	0.3
SMAGP	0.3
ZDHHC24	0.3
TMEM256	0.3
LILRA5	0.3
PPA2	0.3
ST6GALNAC4	0.3
MFSD2B	0.3
MUSTN1	0.3
ALG5	0.3
SEC61A1	0.3
TMEM30B	0.3
PDF	0.3
MRPS24	0.3
MRPS5	0.3
ANXA2	0.29
CHID1	0.29
ATP5D	0.29
ATP5G1	0.29
CES1	0.29
COX7A2	0.29
DUSP4	0.29
FAU	0.29
FHL3	0.29
FTL	0.29
GNS	0.29
HMBS	0.29
ISG20	0.29
LDHA	0.29
MGAT1	0.29
FURIN	0.29
PML	0.29
PKN1	0.29
PTPN9	0.29
RAG1	0.29
RPL27	0.29
RPLP2	0.29
RPS2	0.29
RPS7	0.29
CCL23	0.29
SHC1	0.29
TBX2	0.29
TRPC6	0.29
TXN	0.29
DAP3	0.29
MOGS	0.29
FZD6	0.29
SLC43A1	0.29
TNFRSF10B	0.29
SQSTM1	0.29
EIF2S2	0.29
PLOD3	0.29
SH2D2A	0.29
TMSB10	0.29
APOBEC3D	0.29
DDX39A	0.29
ATP5L	0.29
SEPT9	0.29
CKAP4	0.29
PRSS23	0.29
AKAP2	0.29
MGAT4B	0.29
FKBP9	0.29
KXD1	0.29
COLGALT1	0.29
SLC38A6	0.29
TMEM134	0.29
DHRS13	0.29
ZFAS1	0.29
FAM129A	0.29
FAM234A	0.29
APOPT1	0.29
C14ORF166	0.29
ADAMTSL4	0.29
PAQR5	0.29
LRR1	0.29
LSM4	0.29
TMEM158	0.29
ZDHHC5	0.29
TMEM8A	0.29
UQCRQ	0.29
C2CD4B	0.29
NDUFA11	0.29
LINC00493	0.29
BOLA2	0.29
DCPS	0.29
PIGU	0.29
EHD4	0.29
LIMS3	0.29
BRE-AS1	0.29
FNDC3B	0.29
FAM129B	0.29
VWA1	0.29
ADH1B	0.28
ADSL	0.28
TPRA1	0.28
AVPR1A	0.28
PABPC4L	0.28
CPT1A	0.28
CSNK2B	0.28
DUSP6	0.28
ETS1	0.28
FCN1	0.28
EGFLAM	0.28
LEP	0.28
LOX	0.28
LUM	0.28
MT1L	0.28
NDUFB5	0.28
NDUFS8	0.28
NFKBIE	0.28
SLC22A18	0.28
PLAT	0.28
POLR2G	0.28
PPIA	0.28
PSMB6	0.28
PTPN12	0.28
RPL23A	0.28
RPL38	0.28
RPS18	0.28
RPS20	0.28
RRBP1	0.28
TGFBR2	0.28
AIMP2	0.28
IFITM1	0.28
TNFRSF6B	0.28
TNFRSF10A	0.28
HCAR3	0.28
RPL14	0.28
PPM1F	0.28
BZW1	0.28
WDR1	0.28
TMEM147	0.28
NDUFS7	0.28
STEAP4	0.28
TUBAL3	0.28
RPP21	0.28
TMEM205	0.28
C3ORF36	0.28
SWI5	0.28
GIMAP6	0.28
TACO1	0.28
COA4	0.28
FAM195A	0.28
JAGN1	0.28
GPBAR1	0.28
RBM20	0.28
CMTM8	0.28
CIDECP	0.28
DDX49	0.28
JAML	0.28
TMEM51	0.28
STAP2	0.28
UNC5B	0.28
C20ORF24	0.28
LMOD3	0.28
FAM20C	0.28
RCN3	0.28
KIAA1462	0.28
DPP9	0.28
ARFGAP3	0.28
LINC01420	0.28
UBL5	0.28
G6PC3	0.28
BBC3	0.28
EIF3K	0.28
ZNF787	0.28
FKBP10	0.28
MRPL13	0.28
IER5L	0.28
XIRP2	0.28
ACTB	0.27
AHCY	0.27
ANXA2P2	0.27
AREG	0.27
CFB	0.27
BMP6	0.27
TMEM258	0.27
CALR	0.27
CALU	0.27
CDKN2C	0.27
CENPB	0.27
CTSL	0.27
DDT	0.27
DPP4	0.27
EIF4A1	0.27
EMP3	0.27
ETFB	0.27
CHST13	0.27
FCGRT	0.27
FRZB	0.27
GLB1	0.27
GPR35	0.27
IL4R	0.27
MIF	0.27
UQCC3	0.27
MYH11	0.27
NAGLU	0.27
NDUFA2	0.27
NTHL1	0.27
PLA2G2A	0.27
PMM2	0.27
POLD1	0.27
POLR2L	0.27
SRGN	0.27
PSMB8	0.27
PSMC1	0.27
RPL24	0.27
RPL28	0.27
RPL32	0.27
RPS5	0.27
SEC13	0.27
SELE	0.27
SNAI1	0.27
SOD3	0.27
TNXB	0.27
TUFM	0.27
UQCRC1	0.27
ZIC2	0.27
RAB19	0.27
UXT	0.27
EIF3F	0.27
TNFRSF14	0.27
TNFRSF10C	0.27
AIP	0.27
KRT75	0.27
PDLIM1	0.27
STK17A	0.27
RIN1	0.27
HS3ST3B1	0.27
NMUR1	0.27
DLC1	0.27
CLEC10A	0.27
ATP5H	0.27
RUVBL2	0.27
LINC01300	0.27
ERP29	0.27
ADRM1	0.27
C10ORF10	0.27
CDC37	0.27
ANXA10	0.27
YIPF2	0.27
TSEN34	0.27
GLMP	0.27
OPA3	0.27
ADAM33	0.27
ATP6V0D2	0.27
COL5A3	0.27
DERL2	0.27
HGH1	0.27
C1ORF64	0.27
CHCHD5	0.27
ERGIC3	0.27
OR2A1	0.27
SMIM3	0.27
C11ORF24	0.27
TRAPPC3L	0.27
TMEM214	0.27
DUS2	0.27
TMEM150B	0.27
BRIX1	0.27
FAM46A	0.27
DNPEP	0.27
GIMAP8	0.27
COQ9	0.27
CORO1B	0.27
POLD4	0.27
TRAPPC1	0.27
BRMS1	0.27
FAM162A	0.27
NDUFAF2	0.27
CECR5	0.27
MYOCD	0.27
HIGD2A	0.27
NOB1	0.27
ORMDL2	0.27
AEN	0.27
MRPL34	0.27
ADCY3	0.26
ADH1C	0.26
UBL4B	0.26
DDRGK1	0.26
ATP5G2	0.26
ATP5O	0.26
BCAT1	0.26
CASP7	0.26
CDC34	0.26
CKS2	0.26
CLIC2	0.26
CLPTM1	0.26
COL13A1	0.26
CREM	0.26
CTSG	0.26
DES	0.26
DMP1	0.26
EMP2	0.26
SLC29A1	0.26
EPHA3	0.26
ERCC1	0.26
ETV2	0.26
FES	0.26
FOSL2	0.26
GAPDH	0.26
GH1	0.26
GRK5	0.26
GRN	0.26
GSTP1	0.26
CFH	0.26
ID1	0.26
IFNGR2	0.26
IGFBP5	0.26
IL10	0.26
ITGB3	0.26
JUP	0.26
KCNJ15	0.26
LAMB2	0.26
NDUFA6	0.26
NDUFS4	0.26
NDUFV2	0.26
NTRK1	0.26
OAZ1	0.26
SERPINE1	0.26
PCOLCE	0.26
PDGFA	0.26
PFDN5	0.26
PLAUR	0.26
PSMD13	0.26
PVT1	0.26
RBMS1	0.26
RPL18	0.26
RPS10	0.26
RPS15A	0.26
RPS21	0.26
RPS28	0.26
SPRED3	0.26
CXCL11	0.26
SDF2	0.26
SMPD1	0.26
SNAPC2	0.26
GIMAP1	0.26
TKT	0.26
TPM2	0.26
XBP1	0.26
C8ORF59	0.26
CST7	0.26
EIF3G	0.26
BANF1	0.26
CCRL2	0.26
PAPSS2	0.26
PDLIM7	0.26
IL27RA	0.26
S100A16	0.26
PTGES	0.26
ATP6V1G1	0.26
MTFR1	0.26
KEAP1	0.26
NAALADL1	0.26
COX17	0.26
SCAMP3	0.26
SORBS3	0.26
ALG3	0.26
SLC35B1	0.26
CNPY2	0.26
LYPLA1	0.26
FBLN5	0.26
SSSCA1	0.26
HCAR2	0.26
RAB32	0.26
FSTL1	0.26
RASSF1	0.26
COLEC11	0.26
PDCL3	0.26
CCDC86	0.26
ISOC2	0.26
FAM57A	0.26
B3GNT8	0.26
SPRY4	0.26
ZNF524	0.26
RAB42	0.26
FBXO17	0.26
ZNF526	0.26
DHH	0.26
TOMM6	0.26
DESI2	0.26
RAB34	0.26
CKLF	0.26
BFAR	0.26
ISYNA1	0.26
ALKBH7	0.26
SIRT6	0.26
ELOF1	0.26
CES1P1	0.26
SIK1	0.26
ITPRIP	0.26
NANS	0.26
QPCTL	0.26
TOR4A	0.26
TMEM140	0.26
PLAC9	0.26
EMC3	0.26
RNF114	0.26
NBEAL2	0.26
SEC11A	0.26
HEBP2	0.26
DEGS2	0.26
GADD45GIP1	0.26
YIF1B	0.26
C19ORF52	0.26
RAET1G	0.26
SRPRB	0.26
PGLS	0.26
LSM12	0.26
TBL2	0.26
C17ORF49	0.26
CHMP2A	0.26
ZNF330	0.26
SAC3D1	0.26
TIMM22	0.26
SLC39A3	0.26
PERP	0.26
POPDC2	0.26
A2M	0.25
CCDC58	0.25
ACTG1	0.25
ARAF	0.25
BLMH	0.25
SERPING1	0.25
CASP3	0.25
CD8B	0.25
CNN2	0.25
COL1A2	0.25
COL15A1	0.25
COX5B	0.25
CTSK	0.25
CYC1	0.25
EXTL3	0.25
FABP5	0.25
FBLN1	0.25
FBLN2	0.25
FHL2	0.25
FTH1	0.25
GBE1	0.25
GNG5	0.25
H2AFZ	0.25
HK3	0.25
HLA-H	0.25
ADM5	0.25
HSPD1	0.25
IGFBP6	0.25
CXCL8	0.25
LOXL2	0.25
LSP1	0.25
LTBP2	0.25
NDUFB1	0.25
PLAU	0.25
POLR2H	0.25
PPP4C	0.25
PSMB4	0.25
RPL37	0.25
RPL39	0.25
RPN2	0.25
RPS29	0.25
SNRPG	0.25
SSR4	0.25
STC1	0.25
STX3	0.25
SURF4	0.25
TDGF1	0.25
TEC	0.25
TEK	0.25
TNS1	0.25
DNLZ	0.25
PSMG1	0.25
FGF18	0.25
GMPS	0.25
WISP1	0.25
BUD31	0.25
RPL23	0.25
PDIA4	0.25
TNFSF15	0.25
ARPC5	0.25
ARPC2	0.25
LPAR6	0.25
TRIB1	0.25
LILRB2	0.25
MYL9	0.25
EIF3M	0.25
RNASEH2A	0.25
PDPN	0.25
POSTN	0.25
IGF2BP2	0.25
B3GNT2	0.25
TSPAN9	0.25
BTNL8	0.25
ESRP2	0.25
RP9P	0.25
APOL3	0.25
AGRN	0.25
CLPTM1L	0.25
MOB2	0.25
TMC4	0.25
LOC115110	0.25
MIR4435-2HG	0.25
GLT8D2	0.25
PLVAP	0.25
NOSIP	0.25
POLR1D	0.25
SHISA5	0.25
PBDC1	0.25
ETV7	0.25
ANAPC11	0.25
ZNF581	0.25
CATSPER1	0.25
SNHG6	0.25
MGC12916	0.25
PHF5A	0.25
ORAI1	0.25
TMEM60	0.25
TCF23	0.25
CMC1	0.25
FXYD5	0.25
TMED9	0.25
LOC644936	0.25
SLC35C1	0.25
C12ORF45	0.25
ITGA11	0.25
BIN3	0.25
PMPCA	0.25
PPAN	0.25
LY96	0.25
NIT2	0.25
MRPL52	0.25
MSRB3	0.25
FAM162B	0.25
C6ORF1	0.25
C1ORF43	0.25
RNF167	0.25
NLRP12	0.25
OVCA2	0.25
TIMM9	0.25
PRELID1	0.25
TEX36	0.25
ATG101	0.25
BOLA3	0.25
NTMT1	0.25
RBAKDN	0.25
TMEM208	0.25
UQCR10	0.25
SNX8	0.25
EFEMP2	0.25
NUDT19	0.25
PDLIM2	0.25
PLEKHG2	0.25
ACTL6A	0.24
FAS	0.24
KCTD14	0.24
MRPS34	0.24
BDKRB1	0.24
C1QBP	0.24
C7	0.24
LIMS3-LOC440895	0.24
CAPNS1	0.24
CD28	0.24
CKS1B	0.24
AP2S1	0.24
COX7B	0.24
DAPK3	0.24
ECI1	0.24
GADD45A	0.24
DLST	0.24
EEF1D	0.24
EGFR	0.24
EIF4G2	0.24
ELK3	0.24
FBL	0.24
EXT2	0.24
FAP	0.24
FLOT2	0.24
GTF3A	0.24
INS-IGF2	0.24
HMGB2	0.24
KRTCAP2	0.24
ITGA3	0.24
ITPA	0.24
KRT10	0.24
LTBR	0.24
MDK	0.24
RAB8A	0.24
RPL22L1	0.24
NDUFA3	0.24
NNMT	0.24
PCSK5	0.24
SLC25A3	0.24
PLS3	0.24
POLE2	0.24
POLR2E	0.24
CTSA	0.24
MAP2K2	0.24
RAB13	0.24
RP9	0.24
RPL13	0.24
MRPL23	0.24
RPL31	0.24
RPL34	0.24
RPL36AL	0.24
RPL37A	0.24
RPS11	0.24
RPS13	0.24
SFRP4	0.24
SH3GL1	0.24
SNRPF	0.24
NKX2-6	0.24
AURKA	0.24
PSORS1C1	0.24
TBX15	0.24
TCEB1	0.24
THBS1	0.24
TNNC1	0.24
MAFK	0.24
SHFM1	0.24
HIST1H4J	0.24
B4GALT3	0.24
TRADD	0.24
EDF1	0.24
IQGAP1	0.24
SOCS2	0.24
ATP6V0E1	0.24
FIBP	0.24
IL32	0.24
KLF4	0.24
GSTO1	0.24
APBA3	0.24
APOBEC3B	0.24
AKAP12	0.24
TBC1D4	0.24
MRC2	0.24
SAE1	0.24
PDIA6	0.24
ALYREF	0.24
UBAC2	0.24
HCG9	0.24
PAK4	0.24
BTNL3	0.24
BTG3	0.24
IMMT	0.24
LILRB5	0.24
KDELR2	0.24
TRIOBP	0.24
KDELC1	0.24
ACSS3	0.24
GEMIN7	0.24
GSDMD	0.24
ULBP2	0.24
THSD7B	0.24
WBSCR22	0.24
HM13	0.24
UQCRBP1	0.24
GPR146	0.24
C19ORF25	0.24
FMO9P	0.24
SDF4	0.24
IER5	0.24
RWDD1	0.24
ASCC2	0.24
MFSD7	0.24
LRRC8C	0.24
ZDHHC18	0.24
PRADC1	0.24
TMEM14C	0.24
CUTA	0.24
POLR3K	0.24
FAM126A	0.24
TNKS1BP1	0.24
IL20RB	0.24
OLFML1	0.24
FAM20A	0.24
C20ORF27	0.24
CCDC109B	0.24
DRAM1	0.24
NID2	0.24
FGD6	0.24
VIMP	0.24
TRAM1	0.24
C2ORF83	0.24
RARS2	0.24
SLAMF9	0.24
MRPL47	0.24
PHLDB2	0.24
DCAF15	0.24
PLEKHA4	0.24
BRI3	0.24
POLDIP2	0.24
MYADM	0.24
LINC01558	0.24
INAFM1	0.24
CENPW	0.24
SRPX2	0.24
UBE2S	0.24
RPL13AP20	0.24
ALDH16A1	0.24
BLOC1S3	0.24
SNHG17	0.24
BZW2	0.24
METTL5	0.24
PPIAL4C	0.24
MCUR1	0.24
C19ORF33	0.24
NFKBIZ	0.24
AAED1	0.24
SGPP2	0.24
MRPL11	0.24
SLC26A6	0.24
ACP2	0.23
ACP5	0.23
ADORA2A	0.23
ADPRH	0.23
LRRC15	0.23
BMP1	0.23
POLR3D	0.23
BNIP1	0.23
BPI	0.23
CCND3	0.23
CFL1	0.23
CEACAM3	0.23
COL1A1	0.23
COL3A1	0.23
KLF6	0.23
COX6C	0.23
COX7C	0.23
CRIP2	0.23
CYP1B1	0.23
DDB2	0.23
DNASE1L1	0.23
ECH1	0.23
ERF	0.23
FKBP2	0.23
FLNA	0.23
FTH1P3	0.23
GCH1	0.23
GLA	0.23
GMDS	0.23
HMGA1	0.23
HNRNPC	0.23
HSPA5	0.23
IL1RAP	0.23
ISLR	0.23
ITIH1	0.23
KIFC3	0.23
LDLR	0.23
SMAD6	0.23
MEA1	0.23
MGAT2	0.23
MMP12	0.23
MMP14	0.23
NAB2	0.23
NME1	0.23
PFDN2	0.23
PPP1CA	0.23
MPLKIP	0.23
PRRG2	0.23
PSMA2	0.23
PSME2	0.23
PTN	0.23
RP1	0.23
RPL17	0.23
RPL35A	0.23
RPS12	0.23
S100A11	0.23
CCL20	0.23
SNAI2	0.23
SRF	0.23
COMMD6	0.23
TCF15	0.23
DYNLT1	0.23
TK1	0.23
TNFAIP3	0.23
TSTA3	0.23
UBE2E1	0.23
UCHL3	0.23
VPREB1	0.23
WEE1	0.23
ZIC3	0.23
SLC39A7	0.23
TOMM5	0.23
HIST2H2AC	0.23
HIST1H2BH	0.23
SLC25A11	0.23
APOL1	0.23
INE2	0.23
FADD	0.23
CES2	0.23
NRP2	0.23
HAP1	0.23
F2RL3	0.23
SOCS3	0.23
TRIP10	0.23
MED27	0.23
GMFG	0.23
TMEM37	0.23
TRPM6	0.23
LVRN	0.23
KCNE2	0.23
SNUPN	0.23
ARPC4	0.23
PREB	0.23
EIF1	0.23
EMC8	0.23
ABCA9	0.23
NPM3	0.23
GNB2L1	0.23
LINC00704	0.23
RABAC1	0.23
SIVA1	0.23
IGF2BP3	0.23
CCT8	0.23
SLC27A3	0.23
CHEK2	0.23
COPE	0.23
STK38	0.23
ALG8	0.23
TRAPPC6A	0.23
PPDPF	0.23
LILRA6	0.23
RBM42	0.23
CRELD2	0.23
SHCBP1	0.23
MZT2B	0.23
TTYH3	0.23
CARD16	0.23
GBP4	0.23
MALSU1	0.23
MRPL53	0.23
ANGPTL4	0.23
TNFRSF12A	0.23
TEX264	0.23
TMA7	0.23
CINP	0.23
PIGT	0.23
SLC25A39	0.23
EBPL	0.23
FAM167B	0.23
RELT	0.23
MFSD5	0.23
ITPRIPL1	0.23
PRR26	0.23
PNLIPRP3	0.23
YIPF1	0.23
C8ORF82	0.23
C14ORF119	0.23
RPIA	0.23
BAIAP2L1	0.23
SLC50A1	0.23
MRPL21	0.23
CLDN14	0.23
SDF2L1	0.23
SLC2A4RG	0.23
ENY2	0.23
KCNK17	0.23
CEMIP	0.23
OTULIN	0.23
CTU1	0.23
LSM2	0.23
YIPF3	0.23
REXO2	0.23
HEYL	0.23
SIGIRR	0.23
TMEM189	0.23
LSM3	0.23
APEX2	0.23
SP140L	0.23
MFSD12	0.23
STRN4	0.23
SERTAD1	0.23
NRBP1	0.23
DUSP15	0.23
LOC653786	0.23
MRPS11	0.23
FKBP9P1	0.23
IMMP1L	0.23
ACTN1	0.22
ACTN3	0.22
ALDH1A3	0.22
RHOA	0.22
RHOC	0.22
ATOX1	0.22
BDKRB2	0.22
BYSL	0.22
CA12	0.22
CCNB1	0.22
CTSC	0.22
CHRNB4	0.22
CLC	0.22
OCIAD2	0.22
COL6A3	0.22
COL11A1	0.22
COX6A1	0.22
CSNK1G2	0.22
CTSD	0.22
DDIT3	0.22
DECR1	0.22
CFD	0.22
EFNB2	0.22
EREG	0.22
FABP4	0.22
FABP7	0.22
G6PD	0.22
GPX4	0.22
GPX7	0.22
HSD17B10	0.22
HLA-B	0.22
HLA-C	0.22
HSF1	0.22
HSPE1	0.22
HTR2B	0.22
IDH1	0.22
IL1RN	0.22
IL2RA	0.22
CXCR2P1	0.22
CXCL10	0.22
IRF3	0.22
STT3A	0.22
KPNA2	0.22
LOXL1	0.22
MCL1	0.22
MAP3K11	0.22
MSN	0.22
MYO9B	0.22
NDUFAB1	0.22
NDUFB3	0.22
NDUFB4	0.22
NDUFB9	0.22
NDUFB10	0.22
NDUFS5	0.22
NFKB2	0.22
NGFR	0.22
OGN	0.22
PDCD2	0.22
PLOD1	0.22
PMAIP1	0.22
EXOSC9	0.22
POLH	0.22
LGMN	0.22
PSMA4	0.22
PSMB7	0.22
PTGFRN	0.22
PTGS1	0.22
PTMA	0.22
RNASE1	0.22
RNH1	0.22
RPL30	0.22
RPS3	0.22
RPS4X	0.22
RPS6	0.22
RPS9	0.22
RPS14	0.22
RPS16	0.22
S100A9	0.22
SCN4A	0.22
SGSH	0.22
CCDC107	0.22
SRPRA	0.22
TAP1	0.22
TBCE	0.22
MLX	0.22
TMSB4XP8	0.22
TUBG1	0.22
UCK2	0.22
TEX19	0.22
ZIC1	0.22
ZNF90	0.22
CDC45	0.22
ITGA8	0.22
LINC00116	0.22
STX10	0.22
SUCLG1	0.22
EIF2B2	0.22
MBD2	0.22
MAP3K6	0.22
PTTG1	0.22
MSC	0.22
WDR46	0.22
S1PR2	0.22
TRIP13	0.22
NEURL2	0.22
RCE1	0.22
SH2B3	0.22
NR1H3	0.22
TIMM17B	0.22
ARPC1A	0.22
MRPL28	0.22
GIPC1	0.22
CFHR3	0.22
RBPMS	0.22
BAZ1A	0.22
TWF2	0.22
ARL16	0.22
LBHD1	0.22
ULBP3	0.22
MXRA7	0.22
RNASEK	0.22
SBSN	0.22
ZC3H12A	0.22
REEP4	0.22
SAAL1	0.22
LOC113230	0.22
TMEM99	0.22
TM4SF19	0.22
RTP3	0.22
C6ORF48	0.22
TRPT1	0.22
RPS27L	0.22
CHCHD2	0.22
DCUN1D5	0.22
NOP16	0.22
MIEN1	0.22
LLPH	0.22
NUDT22	0.22
VPS25	0.22
NAA38	0.22
RBMX2	0.22
LSM8	0.22
TRIM63	0.22
MIR22HG	0.22
ALG2	0.22
SLC16A14	0.22
CTU2	0.22
XXYLT1	0.22
P4HA3	0.22
ADGRD1	0.22
DPM3	0.22
WNT4	0.22
C16ORF91	0.22
L1TD1	0.22
CRLS1	0.22
XAF1	0.22
FAM83G	0.22
LAMTOR1	0.22
C19ORF24	0.22
PARPBP	0.22
RNMTL1	0.22
OLAH	0.22
RALY	0.22
BRK1	0.22
GANAB	0.22
TNS2	0.22
NCSTN	0.22
GCAT	0.22
CLEC5A	0.22
PPP1R15A	0.22
NSMCE2	0.22
SCARA5	0.22
MAP3K7CL	0.22
GPR108	0.22
OLFML3	0.22
MRPS22	0.22
XAB2	0.22
TMEM159	0.22
MCOLN1	0.22
ZNF799	0.22
CCNB1IP1	0.22
POC1A	0.22
EGFL6	0.22
DECR2	0.22
METTL23	0.22
CANT1	0.22
RPL23P8	0.22
MESDC1	0.22
TIMM10	0.22
DAZAP1	0.22
PRDM13	0.22
MGME1	0.22
COQ2	0.22
PUSL1	0.22
LOC388955	0.22
NKIRAS2	0.22
LENG9	0.22
OSTM1	0.22
AAMDC	0.22
MRPL42	0.22
COMMD5	0.22
MRPL18	0.22
TMOD3	0.22
CD209	0.22
TAX1BP3	0.22
MZT2A	0.22
DENND2C	0.22
PRSS41	0.22
METTL7B	0.22
AKT1	0.21
ABCD1	0.21
APRT	0.21
CD200R1	0.21
ARSD	0.21
ART4	0.21
ATP5I	0.21
ATP5J	0.21
ATP6AP1	0.21
AZGP1	0.21
BLVRA	0.21
BST1	0.21
BST2	0.21
CASQ2	0.21
CBR3	0.21
CCNA2	0.21
CEBPB	0.21
COL12A1	0.21
COX4I1	0.21
CRAT	0.21
CSF3	0.21
CTSZ	0.21
DDOST	0.21
CYB5R3	0.21
DRG2	0.21
DTYMK	0.21
E2F1	0.21
EFNB1	0.21
FCGR2B	0.21
FLII	0.21
FPR3	0.21
FUCA2	0.21
XRCC6	0.21
GATA6	0.21
CXCL1	0.21
GZMH	0.21
HNRNPL	0.21
GRPEL2	0.21
HOXB2	0.21
HOXB4	0.21
HSD17B2	0.21
IAPP	0.21
IGF2R	0.21
IMPDH1	0.21
LDHC	0.21
LIF	0.21
LTA4H	0.21
MFNG	0.21
MNAT1	0.21
MSMB	0.21
MT2A	0.21
NDUFA1	0.21
NDUFA8	0.21
NDUFB2	0.21
NDUFS3	0.21
NDUFV1	0.21
RPL10A	0.21
NFKBIB	0.21
NUCB2	0.21
PLCB3	0.21
PLSCR1	0.21
PPM1G	0.21
PSMA6	0.21
PXN	0.21
RAN	0.21
RANBP1	0.21
RAP2B	0.21
RARS	0.21
RPL7A	0.21
RPL18A	0.21
RPL19	0.21
RPL21	0.21
RRM1	0.21
S100A6	0.21
SAA1	0.21
CCL13	0.21
ATP5EP2	0.21
SGTA	0.21
SP100	0.21
TCEB2	0.21
TDGF1P3	0.21
PRDX2	0.21
TGFB3	0.21
TGIF1	0.21
TPD52L2	0.21
TPT1	0.21
UMPS	0.21
NCMAP	0.21
ZAP70	0.21
TCL1A	0.21
SLC10A3	0.21
CPZ	0.21
CCDC61	0.21
SSNA1	0.21
SRSF9	0.21
MARCO	0.21
CTNNAL1	0.21
HRK	0.21
DPM1	0.21
DNAJA3	0.21
ZNF358	0.21
TECR	0.21
EI24	0.21
ATP5J2	0.21
IER2	0.21
ABHD16B	0.21
KIAA0040	0.21
PUM3	0.21
RBX1	0.21
ARPC3	0.21
NOD1	0.21
SPON2	0.21
ECI2	0.21
HAX1	0.21
ZNHIT1	0.21
TADA3	0.21
TM9SF1	0.21
PAICS	0.21
MTMR11	0.21
GSTK1	0.21
MRPL57	0.21
C19ORF43	0.21
ALG12	0.21
ARSJ	0.21
ARHGAP10	0.21
PPP1R3B	0.21
CCDC51	0.21
ZNF672	0.21
UQCRHL	0.21
MAP1LC3C	0.21
ULBP1	0.21
CD276	0.21
RPLP0P2	0.21
C16ORF92	0.21
DTX2	0.21
SLIRP	0.21
ZNF563	0.21
CT45A1	0.21
GINM1	0.21
SESN2	0.21
FAM78B	0.21
MTERF3	0.21
MRPL54	0.21
EMC9	0.21
TMEM120A	0.21
UTP18	0.21
APH1A	0.21
NACAP1	0.21
SPNS1	0.21
C11ORF31	0.21
SPG21	0.21
TRAF7	0.21
COQ5	0.21
RNF135	0.21
AKT1S1	0.21
COMMD7	0.21
MAK16	0.21
FAM207A	0.21
CCDC12	0.21
MBD3	0.21
SPRYD4	0.21
SLC46A3	0.21
NDUFB11	0.21
WDR74	0.21
CISD3	0.21
KLHDC4	0.21
FBXL12	0.21
MRPL16	0.21
TMEM70	0.21
WDR62	0.21
TMEM45A	0.21
NADSYN1	0.21
KIRREL	0.21
RSAD1	0.21
COPG1	0.21
HMGXB3	0.21
RRS1	0.21
SEC61G	0.21
CLCF1	0.21
ELP5	0.21
RAB38	0.21
PNO1	0.21
PSMG2	0.21
PLEKHG1	0.21
ZNF766	0.21
ZNF700	0.21
MIR924HG	0.21
HYPK	0.21
TMEM186	0.21
RPS19BP1	0.21
FBXO22	0.21
PPP1R14B	0.21
HSPB7	0.21
PGAP2	0.21
HEATR9	0.21
CEACAM20	0.21
GAS5	0.21
ARHGAP18	0.21
ANXA2R	0.21
CCDC59	0.21
MRPL22	0.21
SERTAD3	0.21
TBX21	0.21
SLC40A1	0.21
DDTL	0.21
NT5C	0.21
GOLGA6C	0.21
CENPK	0.21
TMBIM1	0.21
CHST8	0.21
MRPL9	0.21
ADH1A	0.2
AGTR1	0.2
AGXT	0.2
AK2	0.2
ANXA2P1	0.2
AOX1	0.2
BIRC3	0.2
BIRC5	0.2
ARHGDIA	0.2
ATF4	0.2
ATP5B	0.2
C5AR1	0.2
NSMCE1	0.2
CCT6A	0.2
CD1A	0.2
CDC20	0.2
CDK2	0.2
CHRNA1	0.2
CHRNE	0.2
PLK3	0.2
SLC31A1	0.2
CRABP1	0.2
CSNK2A2	0.2
NKX2-5	0.2
CTSB	0.2
DHODH	0.2
DHPS	0.2
DNM2	0.2
EIF2S1	0.2
EMD	0.2
ENDOG	0.2
ENO3	0.2
ERCC2	0.2
ETV4	0.2
F3	0.2
FOXD1	0.2
GAST	0.2
SLC37A4	0.2
GPR3	0.2
GSS	0.2
HADHA	0.2
HLA-F	0.2
HOXC10	0.2
HSD11B2	0.2
ICT1	0.2
ACOT12	0.2
IL6	0.2
IL10RB	0.2
TNFRSF9	0.2
ITGA4	0.2
ITGA7	0.2
LAMB1	0.2
LAMC2	0.2
SPRED2	0.2
MANBA	0.2
MEOX1	0.2
MEOX2	0.2
MIPEP	0.2
NUDT1	0.2
MYBL2	0.2
DRG1	0.2
NGF	0.2
PCNA	0.2
PDGFRL	0.2
PF4V1	0.2
PI3	0.2
PLA2G4A	0.2
PLP2	0.2
POMC	0.2
PRCP	0.2
PSMA5	0.2
[truncated: 18,436 more rows]

## Sheet: LIHC
CD34	0.7
PECAM1	0.7
PCDH12	0.69
ESAM	0.69
CAPN11	0.68
CLEC14A	0.68
SH2D3C	0.67
ARHGEF15	0.67
CCM2L	0.66
GJA4	0.65
CXORF36	0.65
KANK3	0.65
ADCY4	0.64
LMO2	0.64
THY1	0.64
BCL6B	0.64
REM1	0.64
ECSCR	0.63
TMEM255B	0.63
ENG	0.62
IL3RA	0.62
MEF2C	0.62
NOVA2	0.62
APLNR	0.61
TGFB1I1	0.61
FXYD6	0.61
EXOC3L1	0.61
EXOC3L2	0.61
SRL	0.6
FLT4	0.59
TIE1	0.59
GRAP	0.59
FAM167B	0.59
ROBO4	0.59
ERG	0.58
LYL1	0.58
MMRN2	0.58
CYYR1	0.58
HSPA12B	0.58
FAM212A	0.58
IGFBP7	0.57
NOTCH4	0.57
SPARC	0.57
GIMAP1	0.57
TAGLN	0.57
RAMP2	0.57
MYCT1	0.57
PLVAP	0.57
SOX17	0.57
ACTA2	0.56
TMEM204	0.56
NRIP2	0.56
GIMAP8	0.56
TSPAN18	0.56
LRRC4B	0.56
GNG11	0.55
OLFML2A	0.55
TCF4	0.55
ADAMTS7	0.55
CDC42EP5	0.55
CALHM2	0.55
EMCN	0.55
HIGD1B	0.55
CD93	0.55
CDH5	0.54
EGFLAM	0.54
GPR4	0.54
SCARF1	0.54
ADGRF5	0.54
GIPC3	0.54
ARAP3	0.54
ARHGAP6	0.53
ENTPD1	0.53
GJA5	0.53
OR51E1	0.53
LINC00924	0.53
LRRC70	0.53
RHOJ	0.53
IL25	0.53
EFNB2	0.52
LRRC32	0.52
PTGIR	0.52
ABI3	0.52
FAM198B	0.52
SYT11	0.52
ADGRA2	0.52
CACNA1C	0.51
COL4A2	0.51
COL15A1	0.51
GABRD	0.51
TBXA2R	0.51
VEGFC	0.51
LDB2	0.51
RAMP3	0.51
KLF2	0.51
FAM110D	0.51
THSD7B	0.51
GIMAP6	0.51
VASH1	0.51
SHROOM4	0.51
ARHGAP31	0.51
PALD1	0.51
ARHGDIB	0.5
GRK5	0.5
HSPG2	0.5
CD200	0.5
TCF21	0.5
RASIP1	0.5
FMNL3	0.5
CNRIP1	0.5
CDH13	0.49
AFAP1L1	0.49
HOXC4	0.49
KCNMB1	0.49
LAMA4	0.49
NOTCH3	0.49
VIM	0.49
RGS5	0.49
DCHS1	0.49
LZTS1	0.49
C1ORF54	0.49
USHBP1	0.49
PTRF	0.49
GALNT16	0.49
TMEM88	0.49
SMOC2	0.49
COL4A1	0.48
EDNRA	0.48
ETS1	0.48
HOXB4	0.48
HOXC5	0.48
MGP	0.48
PLAT	0.48
GMFG	0.48
EFCC1	0.48
MFRP	0.48
JAM3	0.48
GNG2	0.48
CRIP2	0.47
FLI1	0.47
NGF	0.47
PMP22	0.47
PODXL	0.47
HEPH	0.47
PRR16	0.47
DLL4	0.47
ARHGAP23	0.47
F2R	0.46
HIC1	0.46
SAMD14	0.46
SLCO2A1	0.46
GAB3	0.46
LHFP	0.46
PEAR1	0.46
C1QTNF2	0.46
DACT3	0.46
CPXM2	0.46
ITGA11	0.46
PLSCR3	0.46
HEYL	0.46
RGCC	0.46
GGT5	0.45
GUCY1A2	0.45
MCAM	0.45
PRKCH	0.45
TNFRSF4	0.45
VWF	0.45
GPR68	0.45
AOC3	0.45
PLEKHO2	0.45
DHH	0.45
CCDC80	0.45
ZNF423	0.45
CPNE5	0.45
PODN	0.45
C10ORF54	0.45
PDE1A	0.44
TAL1	0.44
SYNPO2	0.44
TP53I11	0.44
MTMR9LP	0.44
GIMAP4	0.44
PDZD4	0.44
TMIGD2	0.44
PPP1R14A	0.44
RASAL3	0.44
ADARB1	0.43
ADCY3	0.43
FBN1	0.43
FLT1	0.43
ID3	0.43
MFGE8	0.43
PDGFRB	0.43
TBX2	0.43
ZNF154	0.43
PIK3R3	0.43
ZEB2	0.43
CALCRL	0.43
C3ORF36	0.43
NRROS	0.43
KCTD12	0.43
ASPN	0.43
ARHGAP15	0.43
PLXND1	0.43
PRND	0.43
NPDC1	0.43
RCN3	0.43
EFEMP2	0.43
BMX	0.42
GSN	0.42
KLRB1	0.42
LUM	0.42
GIMAP7	0.42
PLCL1	0.42
PRELP	0.42
CLEC3B	0.42
ARHGEF17	0.42
ANTXR1	0.42
AGAP2	0.42
COX4I2	0.42
GLIPR2	0.42
SOX18	0.42
CPXM1	0.42
LXN	0.42
SCARF2	0.42
FHOD1	0.42
LRRC4	0.42
CRIP1	0.41
HCG11	0.41
GNGT2	0.41
KCNA5	0.41
PDE2A	0.41
SCN4B	0.41
TCF15	0.41
TRPC6	0.41
LTBP4	0.41
GJC1	0.41
SPRY1	0.41
MRVI1	0.41
CDC42EP3	0.41
CLEC1A	0.41
HVCN1	0.41
FGD5	0.41
DENND3	0.41
NFASC	0.41
TCEAL7	0.41
RGMA	0.41
NAV1	0.41
DNAAF1	0.41
PCDH17	0.41
ADPRH	0.4
BGN	0.4
EPHA4	0.4
EFEMP1	0.4
GAS6	0.4
GUCY1A3	0.4
ITPKB	0.4
KDR	0.4
THBS2	0.4
TNXB	0.4
PXDN	0.4
LY86	0.4
RAPGEF3	0.4
SEMA6B	0.4
TMEM119	0.4
TMEM173	0.4
LBH	0.4
LRRC8C	0.4
UACA	0.4
N4BP3	0.4
HEG1	0.4
ZNF521	0.4
CC2D2B	0.4
EHD2	0.4
FAM101B	0.4
AVPR2	0.39
CMKLR1	0.39
COL6A2	0.39
DOK1	0.39
FAP	0.39
LPAR4	0.39
ICAM2	0.39
MYH11	0.39
PLA2G5	0.39
PTPRB	0.39
SELPLG	0.39
STK10	0.39
TEK	0.39
RELL1	0.39
OTOA	0.39
PIK3R6	0.39
C8ORF58	0.39
CCDC3	0.39
EGFL7	0.39
SYDE1	0.39
PCDH18	0.39
PLEKHG5	0.39
HECW2	0.39
PREX1	0.39
JAM2	0.39
TMEM132E	0.39
RCSD1	0.39
GRASP	0.39
DPEP2	0.39
ATP2A3	0.38
AXL	0.38
RUNX1T1	0.38
FOXF1	0.38
ACKR1	0.38
GUCY1B3	0.38
HCLS1	0.38
JAG2	0.38
PRSS35	0.38
MAP1B	0.38
NRGN	0.38
PDE1B	0.38
COL14A1	0.38
HACD4	0.38
TNFSF12	0.38
ARHGAP25	0.38
NMUR1	0.38
RAB31	0.38
CCDC102B	0.38
CYBRD1	0.38
PRRT1	0.38
APOLD1	0.38
CARD16	0.38
GPBAR1	0.38
SHISA3	0.38
GIMAP5	0.38
ZFPM2	0.38
FAM78A	0.38
CD248	0.38
DOCK6	0.38
RBMS3	0.38
ADORA2A	0.37
CSPG4	0.37
FBLN2	0.37
FGF7	0.37
GGTA1P	0.37
GNAI2	0.37
HOXB2	0.37
ZNF366	0.37
LTBP2	0.37
LTC4S	0.37
LY6H	0.37
MEIS3P1	0.37
RPS6KA2	0.37
SFRP4	0.37
SLIT3	0.37
S1PR4	0.37
LDLRAD2	0.37
NOD1	0.37
BVES	0.37
LDB3	0.37
INMT	0.37
TNFAIP8L2	0.37
KIAA1211L	0.37
ASB2	0.37
NHLRC4	0.37
GJD3	0.37
NCR3	0.37
GPSM3	0.37
COL1A1	0.36
COL12A1	0.36
ELK3	0.36
EPHA3	0.36
GAS1	0.36
GPR21	0.36
ID4	0.36
KRT83	0.36
NGFR	0.36
NPR1	0.36
PDE6G	0.36
HTRA1	0.36
RARG	0.36
CCL14	0.36
MAP3K12	0.36
LAPTM5	0.36
MAP3K6	0.36
FBLN5	0.36
POSTN	0.36
SYNDIG1	0.36
ARHGEF25	0.36
FERMT3	0.36
MEDAG	0.36
TM6SF1	0.36
PHLDB1	0.36
MPEG1	0.36
COTL1	0.36
MSRB3	0.36
FAM26E	0.36
GNB4	0.36
MYOCD	0.36
C1ORF162	0.36
LOC653786	0.36
PRDM1	0.35
CAV1	0.35
CD4	0.35
CD52	0.35
DCN	0.35
FLT3LG	0.35
LOXL2	0.35
NFATC1	0.35
PGF	0.35
TIMP3	0.35
CXCR4	0.35
MFAP5	0.35
HYAL2	0.35
F2RL3	0.35
ARHGEF6	0.35
LPAR6	0.35
CYSLTR1	0.35
PKIG	0.35
FILIP1L	0.35
PEAK1	0.35
IL34	0.35
CD300LF	0.35
NOX4	0.35
CLNK	0.35
CRISPLD2	0.35
RASL12	0.35
MILR1	0.35
DOK5	0.35
AGAP2-AS1	0.35
APOBR	0.35
STAB1	0.35
PIP5K1C	0.35
SUSD2	0.35
LOC221122	0.35
WFDC1	0.35
RASGRP3	0.35
KIF19	0.35
DKK2	0.35
ADAMTSL1	0.35
CCDC81	0.35
CD247	0.34
COL1A2	0.34
ACE	0.34
EBF1	0.34
EPAS1	0.34
GEM	0.34
IL16	0.34
MYO1F	0.34
MYL6	0.34
NOS3	0.34
OGN	0.34
P2RX1	0.34
PLCB2	0.34
PRKG1	0.34
LST1	0.34
TRIL	0.34
FSTL1	0.34
FAM65A	0.34
ASPG	0.34
LINC00310	0.34
TMC8	0.34
MIR503HG	0.34
PALM2-AKAP2	0.34
ZCCHC18	0.34
FBLIM1	0.34
EVA1B	0.34
TRERF1	0.34
SASH1	0.34
P2RY8	0.34
MYOZ1	0.34
ABI3BP	0.34
PPP1R16B	0.34
DENND2A	0.34
SIGLEC8	0.34
ARHGAP18	0.34
NKX2-3	0.34
HTRA3	0.34
ADRA2A	0.33
C7	0.33
NLRC3	0.33
CD6	0.33
CD40LG	0.33
CDH11	0.33
COL5A1	0.33
COL8A1	0.33
VCAN	0.33
EMP1	0.33
FOXS1	0.33
FMO2	0.33
FYN	0.33
GYPE	0.33
JAK3	0.33
KCNC4	0.33
LCP2	0.33
PCDHGC3	0.33
RNASE6	0.33
CCL11	0.33
SLC8A1	0.33
STAT5A	0.33
THBD	0.33
WIPF1	0.33
RASSF2	0.33
EMILIN1	0.33
TMEM240	0.33
ARHGAP10	0.33
FAM127C	0.33
ITPRIP	0.33
CNTN4	0.33
EIF4E3	0.33
LIMS2	0.33
MPRIP	0.33
KLHL6	0.33
CPNE2	0.33
FAM162B	0.33
PLEKHG1	0.33
RIMKLB	0.33
KIF26A	0.33
ARHGAP30	0.33
SLC39A2	0.33
PARVG	0.33
RILPL2	0.33
AEBP1	0.32
CD37	0.32
CD48	0.32
RCBTB2	0.32
CNN1	0.32
COL3A1	0.32
CSF2RB	0.32
CTSW	0.32
EPHB1	0.32
FKBP1A	0.32
ISLR	0.32
PPP1R12B	0.32
OMD	0.32
SPN	0.32
CARMN	0.32
DYSF	0.32
GPR65	0.32
PPM1F	0.32
SPOCK2	0.32
IL18BP	0.32
MTHFD2	0.32
TREX1	0.32
MMP28	0.32
DOK3	0.32
C19ORF35	0.32
HAPLN3	0.32
DOCK8	0.32
CCDC85A	0.32
SLC45A1	0.32
CEND1	0.32
KLRF1	0.32
BIN2	0.32
INPP5K	0.32
PCBP3	0.32
SASH3	0.32
SMIM10	0.32
MMRN1	0.32
MAP7D1	0.32
SLC9A9	0.32
C3ORF70	0.32
PIK3R5	0.32
MARCH4	0.32
GBGT1	0.32
PRR29	0.32
AFAP1	0.32
LRRC10B	0.32
GPR132	0.32
ZDHHC19	0.31
CALM1	0.31
CASQ2	0.31
TNFRSF8	0.31
COL6A1	0.31
CTGF	0.31
SEPT1	0.31
DPYSL3	0.31
FRZB	0.31
GZMM	0.31
HOXB3	0.31
HSPB2	0.31
IGFBP5	0.31
INPP5D	0.31
MYL4	0.31
NOV	0.31
NTF3	0.31
PTGDR	0.31
SELP	0.31
SIPA1	0.31
SYK	0.31
TNFRSF1B	0.31
TPM4	0.31
GRAPL	0.31
WAS	0.31
KCNAB1	0.31
GDF5	0.31
DOK2	0.31
CYTH3	0.31
ITGBL1	0.31
KCNK6	0.31
ACAP1	0.31
LAMC3	0.31
IKZF1	0.31
SFTA1P	0.31
RABEP2	0.31
SVEP1	0.31
OR6F1	0.31
TMEM200A	0.31
CLEC4A	0.31
PLEKHO1	0.31
SLC15A3	0.31
DACT1	0.31
HHIPL1	0.31
TUBB6	0.31
FNDC1	0.31
LYPD5	0.31
SIRPB2	0.31
NID2	0.31
NAGK	0.31
SAMD3	0.31
ADAP2	0.31
RASD2	0.31
SLC24A4	0.31
LRRC4C	0.31
VAX2	0.31
MOXD1	0.31
NEXN	0.31
NAPSB	0.31
BHLHE22	0.31
APOBEC3G	0.31
WTIP	0.31
TMOD2	0.31
EHD3	0.31
ABR	0.3
AOAH	0.3
BTK	0.3
APOBEC3H	0.3
CBR3	0.3
CD2	0.3
CD53	0.3
DOCK2	0.3
S1PR1	0.3
EVI2A	0.3
FYB	0.3
GATA2	0.3
GPR20	0.3
GYPC	0.3
HCK	0.3
NCKAP1L	0.3
HRC	0.3
LAMA2	0.3
NCF4	0.3
NDUFS3	0.3
PAPPA	0.3
PHKG2	0.3
PIK3CD	0.3
DNAJC18	0.3
CCL18	0.3
SH3BGRL	0.3
SLAMF1	0.3
SLC9A1	0.3
UCP2	0.3
FZD4	0.3
FZD8	0.3
ITGA10	0.3
PDLIM4	0.3
PSTPIP1	0.3
SLIT2	0.3
RAB33A	0.3
DCANP1	0.3
CLEC2B	0.3
KLRG1	0.3
CLEC10A	0.3
CELF2	0.3
LILRB3	0.3
CORO1A	0.3
NHSL2	0.3
CERKL	0.3
LIMD2	0.3
SLC10A6	0.3
MARVELD1	0.3
SLC22A17	0.3
LOXL3	0.3
MGARP	0.3
FAM196A	0.3
MXRA8	0.3
LRRN3	0.3
METRNL	0.3
SYTL2	0.3
KIRREL	0.3
SPG20	0.3
EPB41L3	0.3
CMTM3	0.3
DHRS7B	0.3
BOC	0.3
LHX6	0.3
LAT	0.3
CYTH4	0.3
CCDC184	0.3
SCIMP	0.3
HES5	0.3
ALDH1L2	0.3
AIF1	0.29
ANXA1	0.29
RHOG	0.29
FMNL1	0.29
CD3E	0.29
CD5	0.29
CCR5	0.29
EVI2B	0.29
FHL1	0.29
ITGA4	0.29
LCK	0.29
LRMP	0.29
CD180	0.29
PDGFB	0.29
PIP4K2A	0.29
SRGN	0.29
PTPRCAP	0.29
RGS10	0.29
RRAS	0.29
SNAI3	0.29
CCL22	0.29
CXCL12	0.29
SEC14L1	0.29
SLA	0.29
SNAI1	0.29
TMEM71	0.29
ADAMTS15	0.29
TIMP2	0.29
TMSB4XP8	0.29
VAV1	0.29
RNF112	0.29
WDR38	0.29
HAND2	0.29
THEMIS2	0.29
ADAMTS1	0.29
FEZ1	0.29
ARHGEF10	0.29
FAM53B	0.29
SNPH	0.29
TESPA1	0.29
FCHSD2	0.29
CD96	0.29
RCAN2	0.29
IGSF6	0.29
EFS	0.29
SPON1	0.29
RASL10A	0.29
GPIHBP1	0.29
TNFSF13B	0.29
HCST	0.29
IRAK3	0.29
KLF8	0.29
CD300A	0.29
SYNPO	0.29
LRRK1	0.29
KRT27	0.29
NLRP3	0.29
C1QTNF7	0.29
NOSTRIN	0.29
RASGRP4	0.29
LINC00426	0.29
FAM129A	0.29
PRAM1	0.29
PTPN5	0.29
P2RY13	0.29
SPIN2A	0.29
EPB41L4A-AS2	0.29
ARHGAP17	0.29
LGI2	0.29
FAIM2	0.29
SULF2	0.29
FAM124A	0.29
KCNE4	0.29
PRDM8	0.29
SLC44A2	0.29
SEPN1	0.29
TSHZ3	0.29
LCE3E	0.29
NTAN1	0.29
OSTF1	0.29
ZBTB47	0.29
MDS2	0.29
PILRA	0.29
ADGRL4	0.29
NCF1C	0.29
ALOX5	0.28
BCL2	0.28
C1QA	0.28
COL6A3	0.28
COL16A1	0.28
CLEC4F	0.28
EDNRB	0.28
LOC100240735	0.28
FGR	0.28
FPR3	0.28
GNA15	0.28
DCLK2	0.28
IGFBP4	0.28
IL5RA	0.28
IL10RA	0.28
MARK1	0.28
MATK	0.28
NPY5R	0.28
PALM	0.28
RAC2	0.28
SGCA	0.28
SPI1	0.28
TPM2	0.28
TYROBP	0.28
LUZP1	0.28
ST8SIA4	0.28
CHST1	0.28
IL18RAP	0.28
INPP4B	0.28
PDLIM7	0.28
STK17B	0.28
FHL5	0.28
ADAMTS4	0.28
TSPAN2	0.28
FGL2	0.28
MAP4K1	0.28
PRAF2	0.28
TWF2	0.28
PRICKLE1	0.28
FLJ12825	0.28
PRKCDBP	0.28
CXORF21	0.28
TRAF3IP3	0.28
SLC27A1	0.28
OSBPL5	0.28
ARL11	0.28
DEF6	0.28
HDGFRP3	0.28
RBP7	0.28
HDAC7	0.28
NFAM1	0.28
P4HA3	0.28
SSC5D	0.28
PARVA	0.28
UNC5B	0.28
MLC1	0.28
RNF180	0.28
LILRA4	0.28
CHST7	0.28
CCDC89	0.28
PNMAL2	0.28
PLEKHA2	0.28
VPS4A	0.28
PDLIM3	0.28
MYLIP	0.28
POM121L9P	0.28
ARHGAP9	0.28
NXN	0.28
EBF2	0.28
FAM43B	0.27
CD200R1	0.27
RUNX3	0.27
CBLN1	0.27
FAM171B	0.27
CFD	0.27
DLG4	0.27
EFNB1	0.27
FMOD	0.27
GPR3	0.27
IGFBP6	0.27
ITGA9	0.27
KCNJ12	0.27
KRT7	0.27
LGALS9	0.27
LTA	0.27
LY9	0.27
MAN2B1	0.27
MAP1A	0.27
OAZ2	0.27
PML	0.27
PRRX1	0.27
LGMN	0.27
PSAP	0.27
PTGER4	0.27
RBMS2	0.27
SEMA3F	0.27
TBXAS1	0.27
TRPC4	0.27
SCG2	0.27
PEA15	0.27
WISP2	0.27
ADAMTS2	0.27
TBKBP1	0.27
P2RY14	0.27
HS3ST2	0.27
ARPC2	0.27
RASA4	0.27
CD226	0.27
LILRB1	0.27
CD300C	0.27
RIPK3	0.27
STON1	0.27
PRRG3	0.27
SMCO3	0.27
RERGL	0.27
MAP9	0.27
RLTPR	0.27
PTGER4P2-CDK2AP2P2	0.27
STAC3	0.27
NDUFA13	0.27
CERCAM	0.27
GMIP	0.27
CAMKK1	0.27
ANKDD1A	0.27
UBASH3A	0.27
CLEC9A	0.27
NEURL1B	0.27
PPM1K	0.27
EOGT	0.27
NACAD	0.27
ADGRL3	0.27
TNS2	0.27
FGD2	0.27
MS4A7	0.27
NLRC4	0.27
CLIP3	0.27
AK8	0.27
SIGLEC7	0.27
TTC16	0.27
ZNF683	0.27
DSE	0.27
SIRPD	0.27
NCF1	0.27
MYO1G	0.27
XYLT1	0.27
RGS18	0.27
MICAL1	0.27
ACTG2	0.26
MLKL	0.26
C3AR1	0.26
CACNA1A	0.26
CASP1	0.26
CCND2	0.26
CD1C	0.26
TNFSF8	0.26
CD69	0.26
CD72	0.26
CLTB	0.26
COX4I1	0.26
PABPC4L	0.26
CR1	0.26
CRMP1	0.26
CTSS	0.26
DIO3	0.26
EGR2	0.26
FHL2	0.26
FLNA	0.26
HLA-DPB1	0.26
HLA-DQA1	0.26
IL12B	0.26
IL15	0.26
ITGAX	0.26
ITGB2	0.26
KLC1	0.26
LGALS1	0.26
LHCGR	0.26
MNDA	0.26
NFATC4	0.26
PSMB10	0.26
PTGER2	0.26
PTPN7	0.26
RALB	0.26
SCN4A	0.26
CCL5	0.26
SULT1A2	0.26
DDX26B	0.26
TIMP1	0.26
PPP1R18	0.26
TUBA1A	0.26
RECK	0.26
UNC5C	0.26
STX11	0.26
B3GALT4	0.26
SIGLEC5	0.26
AP1S2	0.26
CYTIP	0.26
SEMA4D	0.26
VAMP5	0.26
GTF2A1L	0.26
LAYN	0.26
FAM214B	0.26
NETO2	0.26
IFI27L2	0.26
MS4A4A	0.26
ARID5B	0.26
TAGAP	0.26
TANC1	0.26
FXYD5	0.26
CLRN3	0.26
LOC283731	0.26
C16ORF54	0.26
ARL15	0.26
SIGLEC17P	0.26
ZNF532	0.26
TFEC	0.26
DOCK10	0.26
C10ORF107	0.26
ANGPTL2	0.26
LEPROTL1	0.26
NRIP3	0.26
SCARA5	0.26
MEIS3	0.26
SFMBT2	0.26
DNAJB5	0.26
EGFL6	0.26
EML3	0.26
ST6GALNAC3	0.26
PCED1B-AS1	0.26
SIT1	0.26
GVINP1	0.26
PRDM6	0.26
MOB3A	0.26
DPP7	0.26
TBX21	0.26
TAX1BP3	0.26
TINAGL1	0.26
MS4A6A	0.26
CHST8	0.26
ARAF	0.25
CD86	0.25
CD33	0.25
CD79B	0.25
ADGRE5	0.25
COX7A1	0.25
CYBA	0.25
CYBB	0.25
EMP3	0.25
MECOM	0.25
F3	0.25
GNG7	0.25
CXCR3	0.25
GPT	0.25
HOXB5	0.25
ICAM3	0.25
IFI16	0.25
RBPJ	0.25
IL7R	0.25
IL12RB1	0.25
LAIR1	0.25
MAP6	0.25
MAX	0.25
MYO5A	0.25
OPCML	0.25
PAK3	0.25
PAM	0.25
PYGM	0.25
RAP1B	0.25
S100A4	0.25
FOXI2	0.25
TLL1	0.25
TLN1	0.25
C17ORF102	0.25
EZR	0.25
ZAP70	0.25
PTCH2	0.25
ADAM19	0.25
NRP2	0.25
FAM189A2	0.25
GDF3	0.25
SH2B3	0.25
LILRB2	0.25
MXD4	0.25
NES	0.25
LILRB4	0.25
C10ORF10	0.25
IRX6	0.25
GAL3ST4	0.25
LOC440461	0.25
SLAMF6	0.25
LOC606724	0.25
MOB3C	0.25
SH3BGRL3	0.25
EMILIN2	0.25
TLR7	0.25
SLA2	0.25
FAR1	0.25
RNF135	0.25
C2ORF40	0.25
CECR1	0.25
PPP1R9B	0.25
DNAJC5B	0.25
MB21D2	0.25
AGAP11	0.25
CCDC88B	0.25
NLGN3	0.25
CHST12	0.25
RASA3	0.25
ARRDC5	0.25
PACS1	0.25
YPEL4	0.25
RADIL	0.25
TMEM26	0.25
PCDHB4	0.25
PHACTR2-AS1	0.25
SLAMF8	0.25
JPH2	0.25
ZBTB4	0.25
WDFY4	0.25
TNFAIP8	0.25
C2CD2	0.25
PCED1B	0.25
IPCEF1	0.25
THEMIS	0.25
SCML4	0.25
DAPP1	0.25
LINC00475	0.25
OSCAR	0.25
CXORF65	0.25
GCSAM	0.25
SHE	0.25
CLEC12A	0.25
TMEM229B	0.25
ADGRE2	0.25
ACP5	0.24
ATP2B4	0.24
C1QB	0.24
CAMK4	0.24
CAPG	0.24
CAPNS1	0.24
CD59	0.24
CCR1	0.24
CSF1R	0.24
GYS1	0.24
GZMA	0.24
HOXA2	0.24
HOXD8	0.24
KCNN3	0.24
LAMB1	0.24
LCP1	0.24
LDHB	0.24
MAF	0.24
MFAP4	0.24
NDUFAB1	0.24
NDUFB10	0.24
NOTCH1	0.24
NPY1R	0.24
PRKAR2B	0.24
PRKCB	0.24
TIFAB	0.24
PTPRE	0.24
RGS3	0.24
CCL3	0.24
CCL19	0.24
SEPW1	0.24
TLR4	0.24
TNS1	0.24
TPSAB1	0.24
YWHAB	0.24
DOC2B	0.24
IQGAP1	0.24
CD84	0.24
LPXN	0.24
AKT3	0.24
RGS19	0.24
PROCR	0.24
CXCR6	0.24
LILRA2	0.24
ADAMTS5	0.24
FAM107A	0.24
FZD10	0.24
GABARAP	0.24
ERVFRD-1	0.24
MXRA7	0.24
CARD17	0.24
C14ORF37	0.24
RIN3	0.24
ILF3-AS1	0.24
RNF166	0.24
VILL	0.24
TM4SF18	0.24
PCDHB19P	0.24
ZGPAT	0.24
GPR85	0.24
SEMA5B	0.24
DDIT4	0.24
SIDT1	0.24
SNRK	0.24
BATF3	0.24
PLAC9	0.24
BCAS4	0.24
PLA2R1	0.24
SULF1	0.24
KAZN	0.24
FLRT2	0.24
FGD3	0.24
GJC2	0.24
LRRC43	0.24
AP5B1	0.24
GPR141	0.24
PRKD2	0.24
SNX20	0.24
CLEC4E	0.24
CPAMD8	0.24
SIGLEC9	0.24
TTYH2	0.24
VGLL3	0.24
LMCD1	0.24
ZNF831	0.24
POPDC2	0.24
TEKT3	0.24
BCL11B	0.24
ADCY7	0.23
ART1	0.23
SERPINH1	0.23
CD80	0.23
CETP	0.23
CCR7	0.23
CSRP1	0.23
HBEGF	0.23
EGR3	0.23
ETV6	0.23
MS4A2	0.23
GPX8	0.23
FOLR2	0.23
GZMH	0.23
GZMK	0.23
HLA-DMB	0.23
GGN	0.23
HRH2	0.23
IL2	0.23
ITK	0.23
ITPR1	0.23
ANOS1	0.23
KCNJ2	0.23
KIT	0.23
KRT1	0.23
MMP2	0.23
RGL4	0.23
NDUFA3	0.23
NTRK2	0.23
PAX9	0.23
PCSK5	0.23
PFN1	0.23
PKP1	0.23
PLTP	0.23
POU2F2	0.23
PSMC1	0.23
PTGER3	0.23
PTPN6	0.23
PTPRC	0.23
ST8SIA1	0.23
SIGLEC1	0.23
VAMP2	0.23
TGFB3	0.23
WFS1	0.23
WNT2	0.23
CCR2	0.23
ADAM15	0.23
FCMR	0.23
APOBEC3D	0.23
ZBTB46	0.23
GNA14	0.23
KIAA0040	0.23
FAM131B	0.23
ADAMTSL2	0.23
GFPT2	0.23
RASGRP1	0.23
MYL9	0.23
BASP1	0.23
GPNMB	0.23
GNLY	0.23
PDPN	0.23
LILRB5	0.23
PRSS23	0.23
CD160	0.23
JMJD8	0.23
LILRA6	0.23
CORO7	0.23
LINC00341	0.23
CCDC88C	0.23
KIAA0226L	0.23
AKNA	0.23
TMEM163	0.23
C1QTNF1	0.23
GLT8D2	0.23
KCTD10	0.23
CLDN19	0.23
NCALD	0.23
C6ORF203	0.23
RWDD1	0.23
EVL	0.23
DYDC2	0.23
GALNT15	0.23
CARD6	0.23
PLXDC2	0.23
CORO6	0.23
RELT	0.23
IGSF21	0.23
C11ORF70	0.23
TCF23	0.23
CLIC5	0.23
RAB4B	0.23
A4GALT	0.23
SLC38A9	0.23
SLC25A36	0.23
NECAP2	0.23
TBC1D1	0.23
SPIC	0.23
PCDHGB7	0.23
SH3PXD2B	0.23
HCG22	0.23
ACKR3	0.23
SLC39A12	0.23
ANGPTL5	0.23
KIAA1462	0.23
ISLR2	0.23
TRAPPC1	0.23
ARHGAP22	0.23
ZNF385A	0.23
RGS22	0.23
MYOF	0.23
LOXHD1	0.23
G6PC3	0.23
ST6GALNAC4	0.23
ADAMDEC1	0.23
APOBEC3C	0.23
CCDC102A	0.23
SHISA2	0.23
HAPLN2	0.23
LINC01366	0.23
SLCO3A1	0.23
ZNF101	0.23
TPSB2	0.23
CLEC7A	0.23
RHOH	0.22
ASAH1	0.22
C1R	0.22
CD68	0.22
COX8A	0.22
CTSZ	0.22
DAB2	0.22
DGKA	0.22
GPR183	0.22
EML1	0.22
ESR2	0.22
FABP3	0.22
FUT8	0.22
GPR34	0.22
GSTM5	0.22
IL2RA	0.22
IL2RB	0.22
KCNA3	0.22
LY75	0.22
SH2D1A	0.22
MAL	0.22
MOS	0.22
MSR1	0.22
NDUFB1	0.22
ROR2	0.22
PDE4B	0.22
PLEK	0.22
PPP3CC	0.22
PSMA7	0.22
QSOX1	0.22
SAT1	0.22
CCL23	0.22
SLC12A4	0.22
SMPD1	0.22
SNCG	0.22
C11ORF88	0.22
TBX1	0.22
TGFBR2	0.22
RASA4CP	0.22
SLC25A11	0.22
CD101	0.22
APOBEC3B	0.22
SDC3	0.22
PHYHIP	0.22
EBI3	0.22
STUB1	0.22
TRIM22	0.22
ZER1	0.22
ATP5L	0.22
PDE10A	0.22
CCDC85B	0.22
FAT4	0.22
HAND2-AS1	0.22
MINOS1	0.22
PBX4	0.22
EGFL8	0.22
NETO1	0.22
OSBPL10	0.22
COPZ2	0.22
PLAC8	0.22
PYHIN1	0.22
MEX3B	0.22
CARD19	0.22
SH2D1B	0.22
B3GNT9	0.22
PLPP7	0.22
MEI1	0.22
TCEAL3	0.22
C10ORF71	0.22
STK32C	0.22
OLFML1	0.22
RIN2	0.22
MAGEL2	0.22
ZNF853	0.22
MARCH1	0.22
MSX2P1	0.22
ZCCHC24	0.22
CTTNBP2NL	0.22
PACS2	0.22
GPR161	0.22
PHLDA3	0.22
SYNDIG1L	0.22
C15ORF39	0.22
SEMA3G	0.22
SIGLEC10	0.22
TWSG1	0.22
SIGLEC12	0.22
ADGRG5	0.22
SNX21	0.22
TMCC3	0.22
CADM3	0.22
DNASE2B	0.22
DNM3	0.22
PYGO1	0.22
NLRP12	0.22
PTPN22	0.22
HPGDS	0.22
FIBIN	0.22
SYTL3	0.22
TMEM208	0.22
C11ORF21	0.22
SH3KBP1	0.22
SOX8	0.22
CLSTN2	0.22
ABCG4	0.22
BRE-AS1	0.22
ZMAT3	0.22
MRPL41	0.22
ADA	0.21
ADCY2	0.21
ADRB3	0.21
ACAN	0.21
ALPL	0.21
ANGPT1	0.21
ANGPT2	0.21
RHOC	0.21
ARRB2	0.21
TMEM108	0.21
BCL2A1	0.21
C1QC	0.21
C8B	0.21
CD1E	0.21
CD3G	0.21
CD22	0.21
CD27	0.21
CD28	0.21
SEPT7	0.21
CHD3	0.21
CHRNE	0.21
CCR8	0.21
CNR2	0.21
CSF2RA	0.21
LPAR1	0.21
EGR4	0.21
FABP4	0.21
EMB	0.21
FRG1	0.21
FSHR	0.21
GATA3	0.21
GJA1	0.21
GPR18	0.21
GSTP1	0.21
GYG1	0.21
HK1	0.21
HLA-DPA1	0.21
HPX	0.21
HTR2A	0.21
SP110	0.21
IL9R	0.21
INPP4A	0.21
LCAT	0.21
LIPE	0.21
LSP1	0.21
MFNG	0.21
NAGLU	0.21
SPNS3	0.21
NDUFA8	0.21
P2RY1	0.21
PCOLCE	0.21
PRKX	0.21
PSMB6	0.21
GAPT	0.21
PTGIS	0.21
PTS	0.21
PTX3	0.21
RALGDS	0.21
SCN1B	0.21
CCL21	0.21
SGCD	0.21
SMIM10L2A	0.21
SMTN	0.21
SLPI	0.21
MIR100HG	0.21
TLE4	0.21
C15ORF54	0.21
TWIST1	0.21
TYRO3	0.21
MBNL1-AS1	0.21
ZRSR2	0.21
DGKZ	0.21
CST7	0.21
CPZ	0.21
TMEM242	0.21
SKAP1	0.21
DIRC3	0.21
KRT36	0.21
DOCK11	0.21
FAM127A	0.21
CCRL2	0.21
SH2D2A	0.21
ATP6V0D1	0.21
DCLK1	0.21
CD83	0.21
ADIPOQ	0.21
HOMER3	0.21
KRT72	0.21
PLPPR4	0.21
SIGLEC14	0.21
TSPAN32	0.21
ACTR1A	0.21
SERF2	0.21
CDIPT	0.21
RAI2	0.21
CYP46A1	0.21
MSL3	0.21
UQCR11	0.21
AKAP2	0.21
METRN	0.21
PVRIG	0.21
ZFYVE21	0.21
LILRP2	0.21
KRTAP5-2	0.21
ARHGAP28	0.21
C11ORF63	0.21
SEMA6D	0.21
PGPEP1L	0.21
MAP1LC3C	0.21
C15ORF32	0.21
C16ORF89	0.21
PIK3IP1	0.21
UNC45B	0.21
MAP1LC3B	0.21
LINC00173	0.21
GBP4	0.21
GSG1	0.21
RASSF5	0.21
METTL9	0.21
FAM234A	0.21
TLR8	0.21
MAML2	0.21
FAM109B	0.21
ZNF518B	0.21
PDCD4-AS1	0.21
MIR4697HG	0.21
SNTG2	0.21
WDR86	0.21
HCFC1R1	0.21
LAMTOR1	0.21
SAMD9L	0.21
NMNAT2	0.21
ZNF25	0.21
CEP68	0.21
CTDNEP1	0.21
TNFRSF13B	0.21
PLA2G15	0.21
URAD	0.21
TIGAR	0.21
PLXDC1	0.21
VPS18	0.21
HES4	0.21
IL33	0.21
IGFN1	0.21
CLIC4	0.21
SUSD5	0.21
MYOZ3	0.21
DAPL1	0.21
PPA2	0.21
FILIP1	0.21
COQ2	0.21
C2ORF81	0.21
ANXA2R	0.21
CLECL1	0.21
SPRED1	0.21
SAMSN1	0.21
SEMA4A	0.21
JAG1	0.2
ABCD2	0.2
AMPD3	0.2
ANXA11	0.2
ARG1	0.2
ARHGAP1	0.2
ASS1	0.2
FAM173A	0.2
ATP1A4	0.2
ATP5O	0.2
BDKRB2	0.2
C5AR1	0.2
CA12	0.2
CASP4	0.2
CD3D	0.2
CD40	0.2
CD63	0.2
CEBPE	0.2
CFL1	0.2
CEACAM4	0.2
PPM1M	0.2
CMA1	0.2
COX7A2	0.2
COX7B	0.2
CPA3	0.2
CTBP2	0.2
CTSG	0.2
DNASE1L3	0.2
DPT	0.2
ECM1	0.2
FBP1	0.2
FCN1	0.2
FGFR1	0.2
FHL3	0.2
FLT3	0.2
GTF2A2	0.2
HK3	0.2
HLA-DRB1	0.2
HLX	0.2
PRMT2	0.2
HSPA2	0.2
HSPA8	0.2
IDH3G	0.2
CYR61	0.2
INSL3	0.2
ISG20	0.2
KCND1	0.2
LDHC	0.2
MEOX1	0.2
MGAT1	0.2
MGAT3	0.2
MMP16	0.2
POU6F1	0.2
PRKCQ	0.2
MAPK10	0.2
RCN1	0.2
RCVRN	0.2
RNASE1	0.2
PMEL	0.2
SNTB2	0.2
ABRA	0.2
SULT1A1	0.2
TCEA2	0.2
TCEB2	0.2
DYNLT1	0.2
C14ORF180	0.2
UQCRFS1	0.2
VIPR2	0.2
ADAM12	0.2
SLC25A53	0.2
MYH13	0.2
RGS11	0.2
SLC7A7	0.2
NOG	0.2
IL27RA	0.2
MVP	0.2
CCL26	0.2
TRDN	0.2
CREB3	0.2
VTI1B	0.2
NPC2	0.2
ME3	0.2
PADI2	0.2
LDLRAD3	0.2
ABCB5	0.2
TTC36	0.2
ZNF671	0.2
RNASEK	0.2
B3GNT8	0.2
SLC8B1	0.2
TNFSF12-TNFSF13	0.2
FAM26F	0.2
SDSL	0.2
OR51E2	0.2
FAM49A	0.2
CNPY4	0.2
SAMD11	0.2
NXNL1	0.2
TSR3	0.2
SOX7	0.2
RBP5	0.2
TBC1D10A	0.2
POMP	0.2
NAA38	0.2
CARD11	0.2
TPPP3	0.2
GPRC5B	0.2
GHRL	0.2
SOWAHD	0.2
ANTXR2	0.2
LRRC34	0.2
EWSAT1	0.2
GPR173	0.2
FAM105A	0.2
BNC2	0.2
GPR142	0.2
MYH15	0.2
IL26	0.2
SWAP70	0.2
IQSEC2	0.2
RGL1	0.2
YIPF7	0.2
LPAR3	0.2
PLD3	0.2
KCNK12	0.2
SPIRE1	0.2
MAP3K7CL	0.2
CYSLTR2	0.2
TMEM159	0.2
PAPLN	0.2
FRMD6	0.2
SLC4A10	0.2
TEKT4P2	0.2
ODF2L	0.2
MKL1	0.2
ZDHHC24	0.2
BMP8A	0.2
PARM1	0.2
TBC1D10B	0.2
SLFN11	0.2
GIMAP2	0.2
PLA2G2D	0.2
INAFM1	0.2
NUDT14	0.2
ARMS2	0.2
MYL10	0.2
GIT1	0.2
OR10V1	0.2
ICOS	0.2
GPR171	0.2
GATSL3	0.2
RRN3P2	0.2
ZNF846	0.2
FAM129B	0.2
NDRG4	0.2
AES	0.19
ALOX5AP	0.19
ARL2	0.19
MTMR9	0.19
LRRC15	0.19
NSMCE1	0.19
CACNB3	0.19
MEF2B	0.19
CASQ1	0.19
SIGLEC6	0.19
CD74	0.19
CHKB	0.19
CKB	0.19
CCR4	0.19
CST3	0.19
DPYSL2	0.19
DUSP7	0.19
ECE1	0.19
PHC1	0.19
FCER2	0.19
FCGR2A	0.19
FCGR3A	0.19
MLANA	0.19
BLOC1S1	0.19
HLA-DQB1	0.19
HLA-DRA	0.19
HMX1	0.19
HOXA1	0.19
PLD5	0.19
KRT35	0.19
LEP	0.19
CIITA	0.19
MMP19	0.19
MPG	0.19
MYH8	0.19
MYO9B	0.19
NDUFB2	0.19
NFKBIE	0.19
DDR2	0.19
PDE6B	0.19
CFP	0.19
PLXNA1	0.19
PRF1	0.19
PSMB1	0.19
PTPRS	0.19
RENBP	0.19
CCL4	0.19
SELL	0.19
SNTA1	0.19
FAM219A	0.19
STC1	0.19
STX4	0.19
SERTM1	0.19
TMEM31	0.19
NR2F2	0.19
TIMP4	0.19
TNNC2	0.19
TUFM	0.19
FAM155A	0.19
WNT2B	0.19
ZNF213	0.19
C2ORF66	0.19
SSPN	0.19
SNN	0.19
HRK	0.19
CD163	0.19
SLC9A3R2	0.19
RAPGEF5	0.19
WDR1	0.19
BTN3A3	0.19
IFITM2	0.19
GAS2L1	0.19
PLK2	0.19
RBPMS	0.19
HRH3	0.19
TMEM86A	0.19
VKORC1	0.19
C19ORF43	0.19
KCTD15	0.19
WDR25	0.19
ZDHHC14	0.19
RUNX1-IT1	0.19
TAS1R1	0.19
DCSTAMP	0.19
GDPD5	0.19
TSPAN14	0.19
SLIRP	0.19
RILP	0.19
PRLH	0.19
TMTC1	0.19
ANGPT4	0.19
ATP6V1D	0.19
WDR17	0.19
HPCAL4	0.19
LCMT1	0.19
LIMA1	0.19
CHCHD6	0.19
NUDT22	0.19
C16ORF13	0.19
C14ORF166	0.19
FAM96B	0.19
HECA	0.19
DCTN5	0.19
GALNT7	0.19
PLB1	0.19
BTLA	0.19
S1PR5	0.19
FXYD7	0.19
PNLIPRP3	0.19
CYTL1	0.19
WNT4	0.19
C16ORF91	0.19
RPP25	0.19
PPP2R3C	0.19
TAPBPL	0.19
PIK3CD-AS1	0.19
LINC00303	0.19
SIRPG	0.19
ADGRL1	0.19
KLRK1	0.19
MSRB2	0.19
LMO3	0.19
SEPT8	0.19
TBATA	0.19
RHOBTB2	0.19
WSCD1	0.19
DOCK9	0.19
HAAO	0.19
CARHSP1	0.19
NTSR2	0.19
BRD7P3	0.19
CRYGN	0.19
IFT46	0.19
FATE1	0.19
FAM13C	0.19
EBF3	0.19
AICDA	0.19
TUSC5	0.19
TTLL10	0.19
SLAMF7	0.19
THSD7A	0.19
ZNF462	0.19
LILRA5	0.19
IQCK	0.19
SYCE1L	0.19
PCDHGA12	0.19
LRRC29	0.19
LINC01420	0.19
BSCL2	0.19
LCN6	0.19
TTC39B	0.19
GPR162	0.19
AHDC1	0.19
VENTX	0.19
C11ORF96	0.19
EIF3K	0.19
LINC01550	0.19
TNFAIP8L3	0.19
ZDHHC15	0.19
TCEAL6	0.19
MFSD12	0.19
WDR63	0.19
AAMDC	0.19
TFPT	0.19
ST8SIA5	0.19
KCNIP2	0.19
TRIM61	0.19
ADGRE4P	0.19
PDLIM2	0.19
MMP25	0.19
LMF1	0.19
DTX3	0.19
A2M	0.18
ACTB	0.18
AMPD1	0.18
ANK2	0.18
ARHGAP4	0.18
ARRB1	0.18
CRYBG3	0.18
ATP1B2	0.18
ATP5D	0.18
ATP5E	0.18
ATP5I	0.18
ATP5J	0.18
B2M	0.18
CXCR5	0.18
BSG	0.18
TMPRSS6	0.18
CCIN	0.18
CHIT1	0.18
AP2M1	0.18
AP2S1	0.18
COX5B	0.18
DBP	0.18
ENDOG	0.18
ESRRB	0.18
GPC4	0.18
GCDH	0.18
GNG5	0.18
GUK1	0.18
HDC	0.18
HLA-DOA	0.18
HLA-DQA2	0.18
HSD17B2	0.18
JCHAIN	0.18
IL4R	0.18
JUNB	0.18
KCNK3	0.18
KCNS2	0.18
KLRD1	0.18
LFNG	0.18
LGALS3BP	0.18
LIMK2	0.18
MSN	0.18
ZNF467	0.18
NDUFB5	0.18
NFKB2	0.18
NPR3	0.18
FURIN	0.18
PDE4A	0.18
PDK3	0.18
SERPINB9	0.18
PIK3C2B	0.18
POMC	0.18
PRG2	0.18
PSMB7	0.18
PSMD8	0.18
PTGDS	0.18
PTPRO	0.18
PVRL2	0.18
RARRES3	0.18
RBM4	0.18
RELB	0.18
RPL36AL	0.18
RRAD	0.18
CCL1	0.18
ATP5EP2	0.18
HTRA4	0.18
SPINK2	0.18
ZEB1	0.18
TEAD4	0.18
USF2	0.18
VCL	0.18
LAT2	0.18
PAIP2B	0.18
RGS7BP	0.18
CDK2AP1	0.18
C9ORF139	0.18
PLIN4	0.18
MMP23B	0.18
ADAM6	0.18
OR2T2	0.18
TNFRSF18	0.18
FBP2	0.18
[truncated: 18,436 more rows]

## Sheet: LUAD
CDH5	0.89
ROBO4	0.86
CLEC14A	0.85
HSPA12B	0.84
FOXF1	0.83
ARHGEF15	0.83
S1PR1	0.81
TEK	0.81
CD93	0.81
MYCT1	0.8
ACE	0.79
PECAM1	0.79
VWF	0.79
LDB2	0.79
SH2D3C	0.79
LRRC32	0.78
CD34	0.77
USHBP1	0.76
PCDH12	0.76
GIMAP8	0.76
RHOJ	0.76
STARD8	0.75
CYYR1	0.75
LIMS2	0.75
HLX	0.74
NOTCH4	0.74
NOVA2	0.74
FGD5	0.74
BCL6B	0.74
CXORF36	0.73
PCDH17	0.73
TIE1	0.72
CALCRL	0.72
PEAR1	0.72
THSD1	0.72
LHFP	0.71
MMRN2	0.7
CLEC1A	0.7
ECSCR	0.7
SEMA3G	0.7
JAM2	0.7
RXFP1	0.7
LINC00961	0.7
EDNRB	0.69
FLI1	0.69
RAMP3	0.69
GPIHBP1	0.69
ENG	0.68
IL3RA	0.68
SPARCL1	0.68
CCM2L	0.68
ZEB2	0.68
KANK3	0.68
ERG	0.67
TAL1	0.67
TBX2	0.67
FAM162B	0.67
TCF21	0.66
RAMP2	0.66
FAM13C	0.66
ZNF366	0.65
FHL5	0.65
GPR4	0.64
SLIT3	0.64
AOC3	0.64
EXOC3L1	0.64
STARD13	0.64
CNRIP1	0.64
FCN3	0.63
GIMAP6	0.63
CYGB	0.63
EMCN	0.63
SNRK	0.63
ADGRL4	0.63
FAM101B	0.63
A2M	0.62
SELP	0.62
LYVE1	0.62
FAM124B	0.62
COX4I2	0.62
BTNL9	0.62
ADCY4	0.61
CA4	0.61
CETP	0.61
GFRA2	0.61
GUCY1A2	0.61
STX11	0.61
APLN	0.61
SPOCK2	0.61
LAMC3	0.61
HIGD1B	0.61
COL6A6	0.6
SEPT4	0.6
FAM167B	0.6
CASS4	0.6
CD36	0.59
FHL1	0.59
GJA4	0.59
GYPC	0.59
PTPRB	0.59
CCL18	0.59
SFTPC	0.59
PREX1	0.59
GIMAP1	0.58
TCF4	0.58
CD300C	0.58
FXYD6	0.58
VASH1	0.58
HEG1	0.58
SERPING1	0.57
COL4A1	0.57
LGI3	0.57
TBX5	0.57
MARCO	0.57
FEZ1	0.57
SIRPB1	0.57
TMEM204	0.57
GPR146	0.57
SOX7	0.57
PCDH18	0.57
TMEM100	0.57
ZNF423	0.57
TSPAN18	0.57
NLRC4	0.57
ADCYAP1R1	0.56
AGER	0.56
CMKLR1	0.56
EPAS1	0.56
RGS5	0.56
TBX4	0.56
SH2B3	0.56
LILRB5	0.56
JAM3	0.56
SOX18	0.56
PRX	0.56
COL4A2	0.55
FMO2	0.55
LMO2	0.55
ITGA8	0.55
LILRA6	0.55
RASL12	0.55
PIK3R5	0.55
EGFL6	0.55
ACP5	0.54
ARHGAP6	0.54
C5AR1	0.54
KCNK3	0.54
PDGFB	0.54
ENPP2	0.54
MASP1	0.54
CCL14	0.54
SLCO2B1	0.54
FAM110D	0.54
RASGRP4	0.54
TRPV2	0.54
OLFML1	0.54
ADGRA2	0.54
RGCC	0.54
LGI4	0.54
CD68	0.53
GJA5	0.53
AFAP1L1	0.53
MAP3K3	0.53
PDGFRB	0.53
SRL	0.53
CCL23	0.53
SIGLEC14	0.53
FAM107A	0.53
AKAP2	0.53
CCDC141	0.53
MPEG1	0.53
ANO2	0.53
ADAMTSL3	0.53
DKK2	0.53
C10ORF54	0.53
ADPRH	0.52
CSF2RB	0.52
DAB2	0.52
FLT1	0.52
FPR3	0.52
GRID1	0.52
SAMD14	0.52
GIMAP7	0.52
SCN4B	0.52
TLR4	0.52
CORO2B	0.52
INMT	0.52
CMTM5	0.52
SHANK3	0.52
RSPO1	0.52
GIMAP4	0.52
ZCCHC24	0.52
HEYL	0.52
LAMA4	0.51
MRC1	0.51
CFP	0.51
PTGER4	0.51
PTGIR	0.51
PTH1R	0.51
SGCG	0.51
DYSF	0.51
DCHS1	0.51
CD163	0.51
PPM1F	0.51
SIRPA	0.51
ITLN2	0.51
PEAK1	0.51
PLEKHO2	0.51
PLVAP	0.51
PTRF	0.51
CD248	0.51
ARHGAP31	0.51
PDLIM2	0.51
APLNR	0.5
FIGF	0.5
NCF2	0.5
PDE2A	0.5
PMP22	0.5
NRROS	0.5
SYT15	0.5
TMEM255B	0.5
GNG2	0.5
MS4A7	0.5
EBF1	0.49
EPB41L2	0.49
MCAM	0.49
DOK2	0.49
ABCG2	0.49
ARHGEF6	0.49
IFI30	0.49
LZTS1	0.49
CD300LG	0.49
SIDT2	0.49
PCDHGB7	0.49
CAMK1G	0.49
MCOLN1	0.49
EXOC3L2	0.49
SAMHD1	0.49
SIGLEC7	0.49
LAMP3	0.49
PALD1	0.49
SOX17	0.49
MFSD1	0.49
ADARB1	0.48
ETS1	0.48
NCKAP1L	0.48
HGF	0.48
MPP1	0.48
PRKG1	0.48
SIGLEC1	0.48
TNFRSF1B	0.48
RASSF2	0.48
ARHGAP25	0.48
SORBS3	0.48
ANGPTL7	0.48
SEMA6B	0.48
LILRB3	0.48
SYNM	0.48
FAM78A	0.48
KIAA1462	0.48
RCSD1	0.48
ARHGAP30	0.48
C1ORF162	0.48
ADH1A	0.47
ADH1B	0.47
ANXA6	0.47
CTSZ	0.47
FGR	0.47
HSPB2	0.47
LAIR1	0.47
MMP19	0.47
MSR1	0.47
RECK	0.47
SIGLEC5	0.47
ITM2A	0.47
RAI2	0.47
ADAMTS8	0.47
EFCC1	0.47
C19ORF35	0.47
FAM49A	0.47
NFAM1	0.47
PALM2-AKAP2	0.47
RASIP1	0.47
LMOD3	0.47
FMNL3	0.47
RASGRP3	0.47
LOXHD1	0.47
SIGLEC9	0.47
CD4	0.46
DNASE1L3	0.46
DOCK2	0.46
FLT4	0.46
ACKR1	0.46
GNAI2	0.46
GSTM5	0.46
IL7R	0.46
MEOX2	0.46
MYLK	0.46
PSAP	0.46
ST3GAL2	0.46
ZEB1	0.46
THBD	0.46
KCNAB2	0.46
SLIT2	0.46
LILRB2	0.46
PNPLA6	0.46
RNF122	0.46
MS4A4A	0.46
GIMAP5	0.46
MMRN1	0.46
RTKN2	0.46
MSRB3	0.46
ABI3BP	0.46
LHX6	0.46
OSCAR	0.46
LRRC25	0.46
GRASP	0.46
PILRA	0.46
PIEZO2	0.46
DPEP2	0.46
ATP6V1B2	0.45
LIPA	0.45
CD200	0.45
SPN	0.45
TBXA2R	0.45
TLN1	0.45
GAS7	0.45
SVEP1	0.45
EMILIN2	0.45
PLXDC2	0.45
FRMD4A	0.45
C14ORF132	0.45
GJD3	0.45
ARSB	0.44
FPR1	0.44
GGTA1P	0.44
GRK5	0.44
HMOX1	0.44
MEIS1	0.44
MFAP4	0.44
TACC1	0.44
TGFBR3	0.44
TNS1	0.44
TRPC4	0.44
XPNPEP2	0.44
PLA2G7	0.44
PLPP3	0.44
QKI	0.44
MYL9	0.44
TMEM119	0.44
EMILIN1	0.44
MFRP	0.44
SLC15A3	0.44
CECR1	0.44
DCLK3	0.44
GLIPR2	0.44
TMEM150B	0.44
SIRPB2	0.44
PLA2G15	0.44
AGBL1	0.44
LATS2	0.44
PKNOX2	0.44
AQP9	0.43
CRMP1	0.43
EGR2	0.43
HK3	0.43
NDST1	0.43
KCNA5	0.43
LAMA2	0.43
LCP1	0.43
LRP1	0.43
MFNG	0.43
CXCL12	0.43
SELPLG	0.43
SLC11A1	0.43
TNR	0.43
SLC7A7	0.43
CD300E	0.43
NPL	0.43
KCTD12	0.43
CALHM2	0.43
JPH4	0.43
HAVCR2	0.43
LRRN3	0.43
PLAC9	0.43
TBC1D2B	0.43
CASKIN2	0.43
LMCD1	0.43
ASPA	0.42
CYBB	0.42
GAS6	0.42
GRIA1	0.42
GYPE	0.42
CXCR2	0.42
CD180	0.42
MAF	0.42
MNDA	0.42
MYO1F	0.42
P2RY1	0.42
PODXL	0.42
STK10	0.42
CLEC3B	0.42
LAPTM5	0.42
PABPC5	0.42
LBH	0.42
PDZRN3	0.42
FAM212B	0.42
SASH1	0.42
SLC2A9	0.42
PLA2G4E	0.42
LMOD1	0.42
C20ORF194	0.42
ADRA1A	0.41
ARRB2	0.41
CTSB	0.41
DACH1	0.41
ECM2	0.41
FOXF2	0.41
FXYD1	0.41
PRKCE	0.41
SERTM1	0.41
TBX3	0.41
PDE5A	0.41
CD84	0.41
ABCA8	0.41
PREX2	0.41
C1QTNF1	0.41
TLR8	0.41
LIPN	0.41
CCDC50	0.41
DLL4	0.41
JAML	0.41
FAM26E	0.41
ESAM	0.41
KANK2	0.41
PKHD1L1	0.41
ABCA1	0.4
ADORA2A	0.4
FAM43A	0.4
CACNA1C	0.4
CD53	0.4
CHRM2	0.4
CCR1	0.4
FCGR3A	0.4
FCN1	0.4
FGF7	0.4
RAPGEF1	0.4
IL10RA	0.4
ITGAM	0.4
NOTCH1	0.4
NPR2	0.4
PLCL1	0.4
PRKCH	0.4
SLC8A1	0.4
CD101	0.4
THEMIS2	0.4
ADAMTS1	0.4
KIAA0040	0.4
MAFB	0.4
HS3ST2	0.4
LILRA3	0.4
LINC00341	0.4
CPED1	0.4
FERMT3	0.4
MS4A14	0.4
PLPP7	0.4
GPBAR1	0.4
TM6SF1	0.4
WBP1L	0.4
IGSF10	0.4
TSHZ3	0.4
AOC4P	0.4
ZBTB47	0.4
ARHGAP18	0.4
REM1	0.4
SYNE3	0.4
C1QB	0.39
ENTPD1	0.39
FOXS1	0.39
GRN	0.39
HIC1	0.39
IRF8	0.39
PLA2G5	0.39
PTPRO	0.39
SGCA	0.39
SPARC	0.39
AP1S2	0.39
CTIF	0.39
ELMO1	0.39
MRVI1	0.39
GRAP	0.39
LILRA1	0.39
PTPN21	0.39
VSIG4	0.39
GCOM1	0.39
RSPO4	0.39
ATP6V0D2	0.39
SYDE1	0.39
ELOVL2	0.39
MRAS	0.39
LILRA4	0.39
CYSLTR2	0.39
GIPC3	0.39
ARAP3	0.39
PLBD2	0.39
ABCA3	0.38
ART4	0.38
BTK	0.38
C1R	0.38
C3AR1	0.38
RUNX1T1	0.38
FPR2	0.38
GPR17	0.38
MCEMP1	0.38
KCNJ5	0.38
KCNS2	0.38
MAN2B1	0.38
MOCS1	0.38
NPR3	0.38
DDR2	0.38
OLR1	0.38
STAT5A	0.38
WAS	0.38
S1PR4	0.38
LPXN	0.38
ADAMTS4	0.38
CBLN4	0.38
ARHGEF10	0.38
SUSD6	0.38
ARHGEF17	0.38
IQSEC1	0.38
PLXNC1	0.38
SPON1	0.38
LILRB1	0.38
RIN3	0.38
DOK3	0.38
SIGLEC11	0.38
MRGPRF	0.38
ABI3	0.38
BIN2	0.38
HVCN1	0.38
RAB8B	0.38
ITPRIP	0.38
DNAJC5B	0.38
PIK3AP1	0.38
DUOX1	0.38
SASH3	0.38
UNC5B	0.38
AMOTL1	0.38
DOCK6	0.38
OLFML2B	0.38
STXBP6	0.38
NECAB1	0.38
C1QA	0.37
C1QC	0.37
CBFA2T3	0.37
CD33	0.37
COX7A1	0.37
CR1	0.37
ENPEP	0.37
EVI2B	0.37
EGFLAM	0.37
HCLS1	0.37
LCP2	0.37
PLEK	0.37
CCL13	0.37
SFRP5	0.37
SLA	0.37
SPI1	0.37
TGFB1I1	0.37
TGFBR2	0.37
SYNPO2	0.37
WIPF1	0.37
SDPR	0.37
DOCK11	0.37
RGS9	0.37
PLPPR4	0.37
MRC2	0.37
ABCA9	0.37
NXPH3	0.37
DACT3	0.37
TLR7	0.37
PRAM1	0.37
LRRC8C	0.37
FGD2	0.37
TMEM266	0.37
LILRA5	0.37
MOXD1	0.37
PPP1R16B	0.37
MYADM	0.37
SCIMP	0.37
FAM212A	0.37
TMOD2	0.37
EBF2	0.37
ATP1A2	0.36
CALD1	0.36
CD28	0.36
CD86	0.36
EMP2	0.36
FCER1G	0.36
FCGR3B	0.36
FMOD	0.36
GATA2	0.36
HSPG2	0.36
ICAM2	0.36
P2RX7	0.36
PTPRC	0.36
CLEC11A	0.36
SEC14L1	0.36
PTCRA	0.36
LTBP4	0.36
TNFSF12	0.36
PKD2L1	0.36
CLEC4M	0.36
MAB21L2	0.36
NES	0.36
LILRB4	0.36
STON1	0.36
SYNPO	0.36
ERVFRD-1	0.36
MS4A6E	0.36
TMEM47	0.36
DHH	0.36
ANGPT4	0.36
AGAP2	0.36
TAGAP	0.36
CLIC5	0.36
KIRREL	0.36
STAB1	0.36
SLC43A2	0.36
COL6A5	0.36
NATD1	0.36
TNFAIP8L1	0.36
RFTN2	0.36
ADORA3	0.35
TNFSF8	0.35
CD37	0.35
CHRM1	0.35
COL6A3	0.35
DCN	0.35
DES	0.35
CXCR1	0.35
IL16	0.35
ITGAL	0.35
ANOS1	0.35
LYL1	0.35
PDE4B	0.35
PDE1B	0.35
PIK3CG	0.35
PITPNA	0.35
PRKCB	0.35
RNASE6	0.35
SCN7A	0.35
SLC5A4	0.35
KRTAP19-8	0.35
DOCK4	0.35
IKZF1	0.35
FFAR4	0.35
UPK3B	0.35
SUFU	0.35
MARCH1	0.35
IL17RA	0.35
SLAMF8	0.35
SERINC1	0.35
PHACTR1	0.35
LRRTM2	0.35
PLXNA4	0.35
SNX20	0.35
CYTH4	0.35
EFEMP2	0.35
ERICH4	0.35
ACTG2	0.34
BMPR2	0.34
C7	0.34
CDO1	0.34
RCBTB2	0.34
CSF1R	0.34
DPYSL2	0.34
HBEGF	0.34
GPR21	0.34
GRB2	0.34
ITGA4	0.34
MGAT1	0.34
MYO5A	0.34
NFATC1	0.34
PTAFR	0.34
C10ORF128	0.34
SLC6A4	0.34
SLCO2A1	0.34
SPTBN1	0.34
THY1	0.34
TLL1	0.34
TNXB	0.34
C1ORF140	0.34
ADAMTS2	0.34
NMUR1	0.34
ZNF385D	0.34
KIAA0226L	0.34
COLEC12	0.34
UNC45B	0.34
NLRP3	0.34
KCTD10	0.34
KLF13	0.34
HECA	0.34
APBB1IP	0.34
UACA	0.34
TMEM140	0.34
SLC29A3	0.34
TMEM26	0.34
WNT3A	0.34
FGD3	0.34
SCARF2	0.34
ARHGEF26	0.34
GNB4	0.34
DKK3	0.34
BHLHE22	0.34
TNS3	0.34
PCDH15	0.34
ANO6	0.34
ACTA2	0.33
ALOX5	0.33
AQP4	0.33
BNIP2	0.33
CHN1	0.33
CNN1	0.33
CRHBP	0.33
F8	0.33
FBLN1	0.33
FOXO1	0.33
IGFBP7	0.33
IL12RB1	0.33
ITGAX	0.33
ITIH3	0.33
NAIP	0.33
PTGDS	0.33
COL14A1	0.33
ZYX	0.33
SLC36A1	0.33
GIT2	0.33
CD226	0.33
ADAMTS7	0.33
IQSEC3	0.33
DOCK8	0.33
NRIP2	0.33
CELA2B	0.33
ARAP1	0.33
CHSY1	0.33
NFASC	0.33
PLEKHM2	0.33
PIP5K1C	0.33
CPXM1	0.33
DAAM2	0.33
OTUD1	0.33
MAP3K7CL	0.33
KLHL6	0.33
ZNF438	0.33
ZMIZ1	0.33
ABHD6	0.33
CD300LB	0.33
MAMDC2	0.33
PODN	0.33
SFTPA1	0.33
LOC653653	0.33
VSTM4	0.32
AIF1	0.32
BGN	0.32
CCR5	0.32
COL3A1	0.32
CYB5R3	0.32
DLG2	0.32
FOLR2	0.32
HOXA5	0.32
IL10	0.32
LAMP1	0.32
LSAMP	0.32
LUM	0.32
SMAD6	0.32
MAN1A1	0.32
MYO9B	0.32
PGR	0.32
PLCG2	0.32
CCL16	0.32
STAT5B	0.32
TIMP2	0.32
TIMP3	0.32
VIP	0.32
FAM198A	0.32
SFTPA2	0.32
CNTNAP1	0.32
GAB3	0.32
DLC1	0.32
GLIPR1	0.32
ESM1	0.32
LACC1	0.32
CORO7	0.32
GAL3ST4	0.32
TTC7B	0.32
TOM1L2	0.32
TSPAN14	0.32
STAC3	0.32
SGIP1	0.32
P2RY13	0.32
CPVL	0.32
RASGEF1B	0.32
CRTAC1	0.32
ANGPTL2	0.32
GPR150	0.32
PRND	0.32
ADAMTS9	0.32
KIAA1324L	0.32
PLEKHA2	0.32
PARVB	0.32
AP1B1	0.31
MTMR9	0.31
CALM1	0.31
CD14	0.31
SLC31A2	0.31
CRYBB1	0.31
DPP6	0.31
S1PR3	0.31
PTK2B	0.31
FCGR2A	0.31
ITGA7	0.31
MYH11	0.31
NAGA	0.31
PALM	0.31
PIK3R1	0.31
RAB3IL1	0.31
SGCD	0.31
SH3BGRL	0.31
SYK	0.31
TAGLN	0.31
TGFB3	0.31
EPM2A	0.31
CCR2	0.31
GPR65	0.31
UNC5C	0.31
AP1M1	0.31
ANGPTL1	0.31
LY86	0.31
TBC1D4	0.31
P2RY14	0.31
RASGRP2	0.31
IGSF6	0.31
GPNMB	0.31
CD300A	0.31
FAM65A	0.31
LINC00924	0.31
CYP2U1	0.31
APOLD1	0.31
COL5A3	0.31
CRISPLD2	0.31
ADGRE3	0.31
SSH2	0.31
C10ORF105	0.31
L1TD1	0.31
ADAP2	0.31
SLC9A9	0.31
EOGT	0.31
WDR7	0.31
ABCA6	0.31
CORO1C	0.31
RNF152	0.31
PLSCR4	0.31
SOSTDC1	0.31
WDR81	0.31
GVINP1	0.31
MUSTN1	0.31
SLC39A8	0.31
MS4A6A	0.31
CRTC3	0.31
ADRB2	0.3
ANGPT1	0.3
AOAH	0.3
C2	0.3
CASP5	0.3
CASQ2	0.3
CCND2	0.3
CDH11	0.3
COL1A2	0.3
COL5A1	0.3
COL15A1	0.3
COL16A1	0.3
CREBL2	0.3
NR5A2	0.3
GPR20	0.3
GRIK4	0.3
TMEM174	0.3
HTR2A	0.3
INPP5A	0.3
MAP4	0.3
MMP2	0.3
C7ORF34	0.3
PDGFRA	0.3
PPP3CC	0.3
PRELP	0.3
HTRA1	0.3
RS1	0.3
SLC1A3	0.3
GPR137B	0.3
VIPR1	0.3
MAP3K12	0.3
LOC401463	0.3
SEMA5A	0.3
CD83	0.3
GMFG	0.3
ZBTB46	0.3
ADAMTSL2	0.3
RUSC2	0.3
FRY	0.3
KIF1C	0.3
ST8SIA6	0.3
FERMT2	0.3
LINC01140	0.3
CCDC102B	0.3
CXORF21	0.3
CCDC3	0.3
RELT	0.3
ZFYVE1	0.3
SLCO1C1	0.3
PI4K2A	0.3
DENND3	0.3
CARD8	0.3
LRRC70	0.3
HEY2	0.3
KCNK13	0.3
CLIC4	0.3
BOC	0.3
SNX29	0.3
HSPB7	0.3
HTR7P1	0.3
HSPB6	0.3
TTYH2	0.3
C2ORF71	0.3
OSTM1	0.3
NCF1	0.3
SUSD1	0.3
MICAL1	0.3
ACAN	0.29
CAT	0.29
FOXN3	0.29
COL6A2	0.29
CSPG4	0.29
CTSS	0.29
DLG4	0.29
EDNRA	0.29
GDF10	0.29
GM2A	0.29
GPD1	0.29
HLA-E	0.29
IGF1	0.29
ITGB2	0.29
JAK1	0.29
MEF2A	0.29
NID1	0.29
NPR1	0.29
PROS1	0.29
PTPN1	0.29
SCD	0.29
SCN2B	0.29
CCL2	0.29
SLC12A4	0.29
SNX2	0.29
PXDNL	0.29
VIM	0.29
BEST1	0.29
WNT9B	0.29
SLC30A4	0.29
ELL	0.29
TNFSF13	0.29
TRAM2	0.29
FAM131B	0.29
FIG4	0.29
IL18BP	0.29
LHFPL2	0.29
CELF2	0.29
ARID5A	0.29
TSPAN9	0.29
GPR182	0.29
WWC2	0.29
TMEM106A	0.29
DEFB107A	0.29
GMIP	0.29
CCDC80	0.29
ADAMTSL4	0.29
ARHGAP17	0.29
STAB2	0.29
MAST3	0.29
LRCH1	0.29
SEPT8	0.29
FBXL7	0.29
TBCEL	0.29
FKBP15	0.29
CYP26B1	0.29
TCEAL7	0.29
LXN	0.29
TDRD6	0.29
ST6GALNAC6	0.29
RASAL3	0.29
ACADL	0.28
TNFRSF8	0.28
TPP1	0.28
COL5A2	0.28
CTGF	0.28
FBLN2	0.28
FCGR1A	0.28
GABRD	0.28
GPR34	0.28
HBM	0.28
ISLR	0.28
LAMB1	0.28
MSN	0.28
MDGA1	0.28
MYO1C	0.28
NAP1L5	0.28
NTRK1	0.28
PCDHGC3	0.28
PIK3CD	0.28
PPP2R2B	0.28
PPP3R2	0.28
PTEN	0.28
SPTAN1	0.28
STAC	0.28
TGFB1	0.28
THBS1	0.28
TYROBP	0.28
WNT2	0.28
METTL24	0.28
C20ORF202	0.28
WISP1	0.28
KIAA0355	0.28
PHACTR2	0.28
HS3ST3B1	0.28
NAALADL1	0.28
COLEC10	0.28
RAPGEF4	0.28
VWC2	0.28
CMTM2	0.28
AKNA	0.28
APOL3	0.28
KCNT2	0.28
APCDD1	0.28
IL21R	0.28
KBTBD8	0.28
TRAPPC3L	0.28
LRRK2	0.28
NID2	0.28
RASA3	0.28
APOBR	0.28
ADGRL2	0.28
PCDHGA9	0.28
ESYT1	0.28
HAAO	0.28
BACE1	0.28
SIGLEC10	0.28
JPH2	0.28
HECW2	0.28
ZBTB4	0.28
USP29	0.28
LRRC4C	0.28
SGK223	0.28
NXPE3	0.28
GBGT1	0.28
C19ORF38	0.28
NAPSB	0.28
CSDC2	0.28
PDZRN4	0.28
OR6K3	0.28
EHD2	0.28
CDH23	0.28
PARVG	0.28
ZNF106	0.28
CDK15	0.28
ALOX5AP	0.27
DNM1P46	0.27
ADGRB3	0.27
FMNL1	0.27
CD81	0.27
COL1A1	0.27
CYLD	0.27
CYP17A1	0.27
EMP3	0.27
ADGRE1	0.27
FABP4	0.27
ACSL1	0.27
FLT3	0.27
PPARGC1B	0.27
LTBP2	0.27
OGN	0.27
OTC	0.27
PKD2	0.27
PRKACA	0.27
LGMN	0.27
PTGIS	0.27
RPS6KA2	0.27
SLC6A13	0.27
CLEC4C	0.27
TNFRSF4	0.27
GRAPL	0.27
VCL	0.27
LUZP1	0.27
HACD4	0.27
NDST2	0.27
SCARF1	0.27
CCRL2	0.27
GPR55	0.27
SH3BP5	0.27
CYTIP	0.27
POSTN	0.27
ZBED2	0.27
NDNF	0.27
GLDN	0.27
ATP8B4	0.27
PDCD1LG2	0.27
SPATC1	0.27
CD300LF	0.27
ADAMTS12	0.27
NCKAP5	0.27
OSBPL11	0.27
CHIAP2	0.27
SGTB	0.27
BNC2	0.27
TFEC	0.27
DOCK10	0.27
CCDC88A	0.27
ARHGAP15	0.27
TRIM35	0.27
EPB41L3	0.27
TBC1D9	0.27
SYT11	0.27
PLCL2	0.27
TNS2	0.27
CYB561A3	0.27
DOK6	0.27
STX12	0.27
SLC24A4	0.27
KLHL33	0.27
JAZF1	0.27
PCDHGA12	0.27
NEXN	0.27
CCDC69	0.27
HSPB8	0.27
DENND2A	0.27
LY6G6F	0.27
EHD3	0.27
POPDC2	0.27
ACP2	0.26
SERPINC1	0.26
CAV1	0.26
CD80	0.26
PPM1M	0.26
CTSG	0.26
F11	0.26
FBN1	0.26
XCR1	0.26
GPX3	0.26
HPR	0.26
ID3	0.26
JAK2	0.26
KCNC4	0.26
LAMB2	0.26
LIMS1	0.26
LPL	0.26
SMAD7	0.26
MYH10	0.26
NUCB1	0.26
OSM	0.26
ABCB1	0.26
RANBP3L	0.26
RASGRF2	0.26
SLC4A1	0.26
SLC6A12	0.26
TBXAS1	0.26
TNFAIP3	0.26
VCAM1	0.26
MKNK1	0.26
ZFP92	0.26
HERC1	0.26
TESPA1	0.26
AKT3	0.26
TSPAN2	0.26
TNFSF13B	0.26
FSTL1	0.26
VSX2	0.26
OVCH1	0.26
LRRC2	0.26
FAT4	0.26
C3ORF36	0.26
ITIH5	0.26
TMEM200A	0.26
SOWAHD	0.26
DIXDC1	0.26
SSC5D	0.26
PRR34	0.26
BMP2K	0.26
FNBP1	0.26
N4BP3	0.26
SULF2	0.26
TBC1D1	0.26
PHF24	0.26
ZFYVE26	0.26
ATP10D	0.26
ISLR2	0.26
FCGR1C	0.26
SUN2	0.26
IFFO1	0.26
RNF144B	0.26
TIMD4	0.26
SIGLEC8	0.26
MOB3A	0.26
TMEM229B	0.26
EHD4	0.26
TMEM236	0.26
RGS18	0.26
NCF1B	0.26
PLPPR5	0.26
FAM43B	0.25
AEBP1	0.25
RHOG	0.25
PRDM1	0.25
RUNX3	0.25
SIGLEC6	0.25
CD52	0.25
DCC	0.25
F2R	0.25
F13A1	0.25
FCGR1B	0.25
FGF10	0.25
FYB	0.25
GAB1	0.25
GAS1	0.25
DCLK2	0.25
HAS1	0.25
IGF2R	0.25
CYR61	0.25
INPP5D	0.25
ITGA1	0.25
MFAP3	0.25
MFGE8	0.25
MITF	0.25
NFATC2	0.25
NOTCH3	0.25
PLTP	0.25
PRCP	0.25
S100A3	0.25
CDKL5	0.25
THBS2	0.25
TLR1	0.25
CARMN	0.25
UTRN	0.25
WISP2	0.25
SNPH	0.25
TECPR2	0.25
AKAP13	0.25
OVCH2	0.25
CYBRD1	0.25
PPP1R9B	0.25
CGNL1	0.25
TOX2	0.25
NKD2	0.25
RPL23AP53	0.25
TMEM255A	0.25
CSGALNACT2	0.25
PARVA	0.25
CAMTA2	0.25
ZZEF1	0.25
SMG6	0.25
TTC28	0.25
CHST7	0.25
PLSCR3	0.25
MAN1C1	0.25
P2RY8	0.25
ZNF835	0.25
DUOXA1	0.25
GPR141	0.25
PAMR1	0.25
TBC1D20	0.25
CD209	0.25
ARHGAP9	0.25
NCF1C	0.25
AVPR2	0.24
AXL	0.24
CD22	0.24
COL6A1	0.24
CTSD	0.24
RCAN1	0.24
EGR3	0.24
EML1	0.24
CLN8	0.24
F10	0.24
MS4A2	0.24
GNA11	0.24
GNG7	0.24
GP9	0.24
ITGB7	0.24
NTRK3	0.24
ROR2	0.24
P2RX1	0.24
PDE1A	0.24
GAPT	0.24
RB1	0.24
RGS4	0.24
SNAI3	0.24
SLC14A1	0.24
SNX1	0.24
STK4	0.24
TDO2	0.24
VAV1	0.24
MMP23B	0.24
CPZ	0.24
PEA15	0.24
FCGR2C	0.24
GRAP2	0.24
KRT72	0.24
TRANK1	0.24
ABCC9	0.24
VAT1	0.24
CORO1A	0.24
TMEM240	0.24
DUSP26	0.24
TNFAIP8L2	0.24
SYNPO2L	0.24
ST6GALNAC5	0.24
C1QTNF2	0.24
GLT8D2	0.24
RBP5	0.24
ARID5B	0.24
KIAA1755	0.24
RIN2	0.24
PALMD	0.24
PXK	0.24
RMDN3	0.24
PIK3CD-AS1	0.24
CPPED1	0.24
FLVCR2	0.24
RGL1	0.24
GPRIN3	0.24
AGPAT4	0.24
PLXDC1	0.24
SEMA6A	0.24
KIF17	0.24
RIC1	0.24
GIMAP2	0.24
CC2D2B	0.24
SIRPD	0.24
NOD2	0.24
KANK4	0.24
AGRP	0.23
ATP1B2	0.23
CD5	0.23
ADGRE5	0.23
COL8A1	0.23
VCAN	0.23
CTSK	0.23
DBH	0.23
DPT	0.23
FASN	0.23
FCGRT	0.23
FKBP1A	0.23
FYN	0.23
GLUL	0.23
HEXB	0.23
HSD3B2	0.23
IL1R1	0.23
ITK	0.23
KLC1	0.23
LTC4S	0.23
MMP16	0.23
MYD88	0.23
MYH9	0.23
NCF4	0.23
PDE3B	0.23
SERPINF1	0.23
PIP4K2A	0.23
PTPN6	0.23
SGCB	0.23
SKI	0.23
SNCA	0.23
NACC2	0.23
TPM4	0.23
F2RL3	0.23
ITGBL1	0.23
NCR1	0.23
GDF3	0.23
SDC3	0.23
FAM53B	0.23
EDEM1	0.23
CORIN	0.23
SCRG1	0.23
A2M-AS1	0.23
GNPTAB	0.23
MAP7D3	0.23
DENND1C	0.23
HAPLN3	0.23
LRRC3	0.23
CSMD2	0.23
SLAMF6	0.23
C1QTNF7	0.23
SH3RF3	0.23
CILP2	0.23
RNF166	0.23
EVL	0.23
ANKFY1	0.23
GALNT15	0.23
INSM2	0.23
PARD3B	0.23
PLB1	0.23
C22ORF34	0.23
GPR88	0.23
SUPT20HL1	0.23
WDR37	0.23
FAR2	0.23
SYNE1	0.23
MEIS3	0.23
SIGLEC12	0.23
PARP11	0.23
MARCH8	0.23
MKL1	0.23
NCKAP5L	0.23
IL33	0.23
WFDC1	0.23
UAP1L1	0.23
ANKRD44	0.23
OR1C1	0.23
SH2D4B	0.23
SESN1	0.23
FIBIN	0.23
PRDM6	0.23
TNFAIP8L3	0.23
VGLL3	0.23
PPP1R14A	0.23
GPR132	0.23
ZNF831	0.23
ITPRIPL2	0.23
TPSB2	0.23
ADCY2	0.22
ADRB3	0.22
ALPL	0.22
APOE	0.22
CD200R1	0.22
BST1	0.22
KLF9	0.22
NLRC3	0.22
CACNA2D1	0.22
CD72	0.22
CDH13	0.22
CPA3	0.22
CFD	0.22
GPR183	0.22
ELN	0.22
FABP5	0.22
FLNA	0.22
PRICKLE2	0.22
IFIT2	0.22
IL2RA	0.22
APOBEC3A	0.22
KLRB1	0.22
AFF3	0.22
LTF	0.22
MAP1A	0.22
MEF2C	0.22
MSRA	0.22
NAP1L3	0.22
PAFAH1B1	0.22
PRKCQ	0.22
PTGS1	0.22
CCL3	0.22
SDC2	0.22
SEPP1	0.22
SYN2	0.22
NR2F1	0.22
TGM2	0.22
TNFAIP6	0.22
NUTM2D	0.22
CXCR4	0.22
KCNAB1	0.22
ADAM12	0.22
PLA2G4C	0.22
MPDZ	0.22
PAPSS1	0.22
ATP6V0D1	0.22
RABEP1	0.22
CYTH1	0.22
ITM2B	0.22
SH3PXD2A	0.22
RAPGEF2	0.22
ISM1	0.22
IP6K1	0.22
GJC1	0.22
LRRN2	0.22
MERTK	0.22
SPINT3	0.22
ABCB5	0.22
C1ORF54	0.22
COLGALT1	0.22
LINC00472	0.22
TRPM3	0.22
ATXN1L	0.22
TNFSF12-TNFSF13	0.22
CHST14	0.22
GBP4	0.22
C8ORF58	0.22
FOXP3	0.22
MARVELD1	0.22
CCDC8	0.22
COPZ2	0.22
ZDHHC3	0.22
ANTXR1	0.22
SCARA3	0.22
LOXL3	0.22
TREM2	0.22
SMIM10	0.22
TMEM52B	0.22
AMER2	0.22
SEC14L4	0.22
PCNX	0.22
PLXND1	0.22
AGTPBP1	0.22
WSCD1	0.22
COTL1	0.22
CBX7	0.22
KCTD16	0.22
FAM110B	0.22
ARHGAP23	0.22
CXCL16	0.22
CHRDL1	0.22
CEP85L	0.22
PCED1B-AS1	0.22
C11ORF96	0.22
P2RY10	0.22
PROK2	0.22
PLEKHM3	0.22
HSPA12A	0.22
NALCN	0.22
SMOC2	0.22
C1S	0.21
CD247	0.21
CD6	0.21
CDR1	0.21
CMA1	0.21
KLF6	0.21
CSF2RA	0.21
CX3CR1	0.21
CYP1B1	0.21
CYP7A1	0.21
DNASE2	0.21
STX2	0.21
EVI2A	0.21
FMO3	0.21
FN1	0.21
GNGT2	0.21
GPER1	0.21
GUCY1A3	0.21
HCK	0.21
HLA-DOA	0.21
HLA-DPB1	0.21
HLA-DQA1	0.21
HSD17B4	0.21
IL2RB	0.21
ITGB5	0.21
LOXL1	0.21
MARCKS	0.21
MYO1B	0.21
MUSK	0.21
NBL1	0.21
PCOLCE	0.21
PLCB2	0.21
PRF1	0.21
MAPK11	0.21
PSKH1	0.21
PTPRM	0.21
SLAMF1	0.21
SOX5	0.21
C11ORF87	0.21
ZCCHC5	0.21
TCF15	0.21
TCN2	0.21
TRAPPC10	0.21
TPSAB1	0.21
WT1	0.21
NCOA4	0.21
IL18R1	0.21
NRP2	0.21
NRP1	0.21
PSTPIP1	0.21
N4BP1	0.21
SECISBP2L	0.21
DCANP1	0.21
NUAK1	0.21
ACTR2	0.21
CLEC10A	0.21
CLEC4D	0.21
RAB31	0.21
KERA	0.21
MAP4K1	0.21
CLEC4G	0.21
ARSI	0.21
NHSL2	0.21
AHNAK	0.21
LINC00934	0.21
CLEC4GP1	0.21
PKD1L3	0.21
C1ORF186	0.21
OTOA	0.21
COL18A1	0.21
LACTB	0.21
ARHGEF25	0.21
ALPK2	0.21
CALN1	0.21
CLEC1B	0.21
ZMYND15	0.21
ASB2	0.21
UBASH3B	0.21
C3ORF79	0.21
SH3D19	0.21
ARL15	0.21
ACSM5	0.21
PLEKHB2	0.21
ITGA11	0.21
PALLD	0.21
ZSWIM8	0.21
SETX	0.21
C3ORF70	0.21
CUX2	0.21
FAM21C	0.21
SEPN1	0.21
JDP2	0.21
GMNC	0.21
CEACAM21	0.21
PXDC1	0.21
METTL7A	0.21
MXRA5	0.21
WWTR1	0.21
SNED1	0.21
TMEM132E	0.21
OR5AK2	0.21
ICOS	0.21
PURG	0.21
PRAMEF22	0.21
XYLT1	0.21
ABCG4	0.21
P2RY12	0.21
ABCD2	0.2
BCL2A1	0.2
BMP1	0.2
CD3G	0.2
CD40LG	0.2
CCR8	0.2
CRK	0.2
CSRP1	0.2
DCTN1	0.2
EDN1	0.2
EPB42	0.2
FCGR2B	0.2
FES	0.2
FMO1	0.2
GP5	0.2
HPS1	0.2
IL1B	0.2
ITGAD	0.2
JUNB	0.2
LOX	0.2
LY9	0.2
MEF2D	0.2
MGP	0.2
NDN	0.2
NEK1	0.2
NOV	0.2
PDK4	0.2
SERPINB9	0.2
PIM1	0.2
PKD1	0.2
PLAGL1	0.2
POU2F2	0.2
PTPN7	0.2
PTPRD	0.2
RARRES2	0.2
RTN1	0.2
SCN10A	0.2
SFRP2	0.2
RPL13AP17	0.2
S100Z	0.2
TCP11	0.2
NR2F2	0.2
TSPAN7	0.2
TNNC1	0.2
WNT2B	0.2
ADAM19	0.2
CREG1	0.2
SOCS3	0.2
S1PR2	0.2
ACAP1	0.2
FAM65B	0.2
TBC1D5	0.2
FCHSD2	0.2
LPCAT3	0.2
BTN3A3	0.2
SORBS1	0.2
PDPN	0.2
BVES	0.2
SLC2A6	0.2
TMEM86A	0.2
TANGO6	0.2
SMCO3	0.2
ZDHHC14	0.2
LRRK1	0.2
BICC1	0.2
WDR82	0.2
TMEM110	0.2
GSG1L	0.2
TXNDC5	0.2
CARD16	0.2
IL27	0.2
CLEC4A	0.2
GRIN3A	0.2
SETDB2	0.2
RASSF4	0.2
NIN	0.2
CRIM1	0.2
PYHIN1	0.2
CD244	0.2
ZNF469	0.2
IGSF21	0.2
GPR155	0.2
CD163L1	0.2
SH3TC1	0.2
GFOD1	0.2
HMGCLL1	0.2
LINC00469	0.2
MTMR10	0.2
MARC2	0.2
PID1	0.2
ENOX1	0.2
ARHGEF40	0.2
SAMD3	0.2
ZHX3	0.2
CTTNBP2NL	0.2
SEPT6	0.2
MPRIP	0.2
ICOSLG	0.2
VPS8	0.2
CRTAM	0.2
SLC36A3	0.2
C3ORF84	0.2
GJC2	0.2
ATP8B2	0.2
LRRN4CL	0.2
KIAA1614	0.2
CADM3	0.2
NTAN1	0.2
ELMSAN1	0.2
ARRDC4	0.2
THEMIS	0.2
GOLIM4	0.2
APOBEC3C	0.2
C10ORF67	0.2
SLCO3A1	0.2
GPSM3	0.2
RILPL2	0.2
ANGPT2	0.19
ASAH1	0.19
CD1D	0.19
CD3E	0.19
CD44	0.19
CCR7	0.19
CNR1	0.19
COL13A1	0.19
CSK	0.19
CTNS	0.19
CTSO	0.19
CYP4B1	0.19
CYP27A1	0.19
STOM	0.19
EVC	0.19
FHL3	0.19
GALC	0.19
GHR	0.19
GNAQ	0.19
GPM6B	0.19
LPAR4	0.19
FFAR3	0.19
HHEX	0.19
HLA-DPA1	0.19
ADM5	0.19
IL12A	0.19
IRF5	0.19
ITGA9	0.19
ITPKB	0.19
ITPR2	0.19
KCNJ8	0.19
KDR	0.19
PRSS35	0.19
MAG	0.19
MATK	0.19
CIITA	0.19
MTM1	0.19
TNFRSF11B	0.19
TIGIT	0.19
PDE6G	0.19
VIT	0.19
RAC2	0.19
ATXN1	0.19
CCL7	0.19
SEMA3F	0.19
SMPD1	0.19
SOD3	0.19
SP2	0.19
HTR3C	0.19
MBNL1-AS1	0.19
NR4A3	0.19
PIP5K1B	0.19
MMP23A	0.19
NCOA1	0.19
TNKS	0.19
HYAL2	0.19
FCMR	0.19
TAOK2	0.19
LITAF	0.19
PJA2	0.19
CD302	0.19
RGS19	0.19
KLF2	0.19
GNA13	0.19
IQGAP2	0.19
HCST	0.19
SDS	0.19
MID2	0.19
RGAG4	0.19
GALNT18	0.19
ZNF705A	0.19
KCTD17	0.19
SYNDIG1	0.19
MINK1	0.19
FAM122A	0.19
LEF1	0.19
KATNAL1	0.19
WT1-AS	0.19
SLA2	0.19
DISP1	0.19
UBASH3A	0.19
ST20-AS1	0.19
SIGLEC17P	0.19
BANK1	0.19
P3H2	0.19
ZNF331	0.19
CDV3	0.19
ZHX2	0.19
RTP5	0.19
PDZD2	0.19
MLC1	0.19
SULF1	0.19
ARC	0.19
SLC37A2	0.19
DENND5A	0.19
VPS39	0.19
TPSD1	0.19
MACF1	0.19
KAT6B	0.19
CABP5	0.19
NHSL1	0.19
SLC39A12	0.19
SHROOM4	0.19
C6ORF89	0.19
PI16	0.19
WDFY4	0.19
TICAM2	0.19
DNASE2B	0.19
NLRP12	0.19
KIF26A	0.19
NPNT	0.19
NTN4	0.19
PCOLCE2	0.19
TPK1	0.19
DISC1	0.19
CNTN6	0.19
HPGDS	0.19
C16ORF86	0.19
HTRA3	0.19
LOC389033	0.19
LGALSL	0.19
DSE	0.19
NPAS3	0.19
CSRNP1	0.19
ZNF781	0.19
ABR	0.18
ADCY7	0.18
AGTR1	0.18
APBB2	0.18
ATP6V0A1	0.18
CAMK4	0.18
CEACAM3	0.18
CCR6	0.18
COL8A2	0.18
CSF3R	0.18
CYP19A1	0.18
DNM2	0.18
DOK1	0.18
FGF14	0.18
FOXO3	0.18
GJA1	0.18
GTF2A1	0.18
HEXA	0.18
HSD11B1	0.18
IGFBP4	0.18
NIM1K	0.18
TCTEX1D1	0.18
INHBA	0.18
ITPK1	0.18
LEP	0.18
MAOB	0.18
MEIS2	0.18
CD99	0.18
MMP14	0.18
NPAS4	0.18
MYOC	0.18
NFIC	0.18
PDYN	0.18
PGM5	0.18
PKN1	0.18
PRRG1	0.18
OLFML2A	0.18
RBMS2	0.18
RGS16	0.18
RORA	0.18
CCL8	0.18
SH3GL3	0.18
HTRA4	0.18
FAM170B	0.18
FUT11	0.18
SMARCA2	0.18
SNAI1	0.18
SNX19	0.18
VAMP2	0.18
ADAMTS16	0.18
C14ORF180	0.18
TSPYL1	0.18
TNFSF4	0.18
LAT2	0.18
SIGLEC16	0.18
LOC728392	0.18
GPR68	0.18
STX7	0.18
MSC	0.18
CACNA2D2	0.18
STK17B	0.18
NMT2	0.18
WSCD2	0.18
SMCR8	0.18
HERPUD1	0.18
CLSTN3	0.18
GAB2	0.18
HS3ST4	0.18
CTDSP2	0.18
ACTR1A	0.18
PRG4	0.18
KLRG1	0.18
CRTAP	0.18
SLC27A3	0.18
LINC00936	0.18
ADAMTS5	0.18
PRSS23	0.18
KRT79	0.18
HPS5	0.18
MGAT4A	0.18
C17ORF51	0.18
OR51E1	0.18
MXRA7	0.18
TBC1D10C	0.18
SAP30L	0.18
PRCD	0.18
TTBK2	0.18
DEFB119	0.18
OSBPL8	0.18
APH1B	0.18
TRAT1	0.18
LAP3	0.18
HMCN1	0.18
CERCAM	0.18
AMOTL2	0.18
HHIPL1	0.18
FAM120B	0.18
TUBB6	0.18
GPR174	0.18
ASPRV1	0.18
CLEC9A	0.18
LOC283731	0.18
SSH1	0.18
MIER2	0.18
DAB2IP	0.18
METRNL	0.18
RNF125	0.18
HEMGN	0.18
LINGO3	0.18
SAMD9L	0.18
USP12	0.18
IKZF3	0.18
AAK1	0.18
ZNF407	0.18
RNF130	0.18
MYCBP2	0.18
[truncated: 18,436 more rows]

## Sheet: LUSC
PTPRB	0.86
STARD8	0.86
CDH5	0.85
ROBO4	0.85
S1PR1	0.84
TCF21	0.83
TEK	0.83
CD93	0.83
ESAM	0.83
TIE1	0.82
SH2D3C	0.82
ARHGEF15	0.82
CLEC14A	0.82
GIMAP8	0.81
ENG	0.8
MYCT1	0.8
EDNRB	0.79
DLC1	0.79
CXORF36	0.79
USHBP1	0.79
NPR1	0.78
KANK3	0.78
FLT4	0.76
PECAM1	0.76
A2M	0.75
INMT	0.75
ADGRF5	0.75
AOC3	0.74
GPIHBP1	0.74
LYVE1	0.74
PCDH12	0.74
PDE1B	0.73
RASL12	0.73
RHOJ	0.73
ADH1B	0.72
ADCY4	0.72
GJA5	0.72
IL3RA	0.72
CLEC3B	0.72
KLF2	0.72
ADAMTS8	0.72
CLIC5	0.72
TNS2	0.72
HSPB6	0.72
LRRC32	0.71
NOVA2	0.71
FAM110D	0.71
BCL6B	0.71
LINC00961	0.71
RS1	0.7
TNXB	0.7
SCARF1	0.7
AGER	0.69
AQP1	0.69
FLI1	0.69
VWF	0.69
GPR182	0.69
PALM2-AKAP2	0.69
KIAA1462	0.69
SOX17	0.69
CD34	0.68
CETP	0.68
GJA4	0.68
SOD3	0.68
TBXA2R	0.68
LDB2	0.68
ZEB2	0.68
FBLN5	0.68
GRAP	0.68
AKAP2	0.68
PEAR1	0.68
CLDN18	0.68
CASS4	0.68
RPS6KA2	0.67
TSPAN4	0.67
NOSTRIN	0.67
LMOD1	0.67
KANK2	0.67
ABCA3	0.66
SLC5A9	0.66
MEF2C	0.66
NOTCH4	0.66
GIMAP1	0.66
FCN3	0.66
TMEM204	0.66
HSPA12B	0.66
VASH1	0.66
LIMS2	0.66
SEMA3G	0.66
PRX	0.66
CSRNP1	0.66
CA4	0.65
GPR4	0.65
ARHGEF17	0.65
RAMP3	0.65
GIMAP6	0.65
SYNE1	0.65
GGTLC1	0.65
PKNOX2	0.65
ETS1	0.64
KCNA5	0.64
CACNA2D2	0.64
PLEKHO2	0.64
NLRP3	0.64
RASGRP4	0.64
TRPV2	0.64
PLXND1	0.64
STAB1	0.64
FAM13C	0.64
ARHGAP31	0.64
SNED1	0.64
CCDC69	0.64
C1ORF162	0.64
ANXA6	0.63
ZNF366	0.63
CCL14	0.63
SFTPC	0.63
MARCO	0.63
CD300C	0.63
ECSCR	0.63
EXOC3L1	0.63
JAM2	0.63
SLC39A8	0.63
SERPING1	0.62
DPYSL2	0.62
SAMD14	0.62
TNFRSF1B	0.62
TNFSF12	0.62
FAM107A	0.62
NEXN	0.62
MYOCD	0.62
CNN1	0.61
HIC1	0.61
MRC1	0.61
DPCR1	0.61
PLA2G5	0.61
SELP	0.61
TGFBR2	0.61
PRG4	0.61
SLCO2B1	0.61
C19ORF35	0.61
SYT15	0.61
RHOBTB2	0.61
SUSD2	0.61
SLC46A2	0.61
MUSTN1	0.61
CSF1R	0.6
GPX3	0.6
ITIH3	0.6
PTGIS	0.6
SELPLG	0.6
TGM2	0.6
CD163	0.6
SH2B3	0.6
ABCC9	0.6
MRVI1	0.6
COLEC12	0.6
KCTD12	0.6
PREX1	0.6
IFFO1	0.6
CD4	0.59
FHL1	0.59
GGTA1P	0.59
LAIR1	0.59
MYO1F	0.59
FXYD1	0.59
RBMS2	0.59
ANGPTL1	0.59
LHFP	0.59
ABCA8	0.59
LILRA1	0.59
LILRB3	0.59
WWC2	0.59
FAM167B	0.59
JAML	0.59
SIRPB2	0.59
TBC1D2B	0.59
PIK3R5	0.59
JPH2	0.59
HSPB7	0.59
SIGLEC9	0.59
GPSM3	0.59
CMKLR1	0.58
CTSO	0.58
DLG2	0.58
ACKR1	0.58
MMP19	0.58
GIMAP7	0.58
PTGIR	0.58
CCL23	0.58
SFTPD	0.58
ST3GAL2	0.58
SPI1	0.58
CD302	0.58
RAMP2	0.58
LILRB2	0.58
FAXDC2	0.58
TMEM119	0.58
MFRP	0.58
EMCN	0.58
TMEM255B	0.58
SCARNA17	0.58
MRAS	0.58
WDFY4	0.58
CSDC2	0.58
PODN	0.58
C5AR1	0.57
FMNL1	0.57
DES	0.57
GADD45B	0.57
PTGDS	0.57
SCN7A	0.57
TBXAS1	0.57
ITGA8	0.57
SLC7A7	0.57
MMRN2	0.57
GPR146	0.57
FAM78A	0.57
PALD1	0.57
ALOX5	0.56
CASQ2	0.56
CD14	0.56
ACE	0.56
DOCK2	0.56
F11	0.56
FCN1	0.56
GATA6	0.56
GNAI2	0.56
GRK5	0.56
GKN2	0.56
PDK4	0.56
ENPP2	0.56
PGC	0.56
PMP22	0.56
SLC11A1	0.56
CARMN	0.56
ITGA10	0.56
DOK2	0.56
FHL5	0.56
FAM124B	0.56
ADAMTS10	0.56
DHH	0.56
CGNL1	0.56
GIMAP4	0.56
LRRK2	0.56
FLVCR2	0.56
LOC100129034	0.56
NLRC4	0.56
CHRDL2	0.56
HEYL	0.56
ARHGAP30	0.56
LRRC25	0.56
MYO1G	0.56
ATP1A2	0.55
C7	0.55
EPAS1	0.55
NR5A2	0.55
HYAL2	0.55
THEMIS2	0.55
LHFPL2	0.55
RASGRP2	0.55
CELF2	0.55
MRGPRF	0.55
MEDAG	0.55
OLFML1	0.55
FGD5	0.55
SNRK	0.55
DRAM1	0.55
GIMAP5	0.55
LATS2	0.55
SIGLEC7	0.55
ZBTB47	0.55
ACTA2	0.54
AGTR2	0.54
APLNR	0.54
ART4	0.54
GPD1	0.54
NCKAP1L	0.54
IRF8	0.54
IL1R1	0.54
SMAD6	0.54
TNS1	0.54
VIP	0.54
GAS7	0.54
ADAMTSL2	0.54
IQSEC1	0.54
SYNPO	0.54
RIN3	0.54
DOK3	0.54
ANTXR2	0.54
FAM20A	0.54
TMEM150B	0.54
MPEG1	0.54
SHROOM4	0.54
RASGRP3	0.54
RCSD1	0.54
PILRA	0.54
ADGRL4	0.54
C3	0.53
CCR1	0.53
ERG	0.53
IL10RA	0.53
MEOX2	0.53
CFP	0.53
SEPT4	0.53
C10ORF128	0.53
SLIT3	0.53
SPN	0.53
TBX5	0.53
WAS	0.53
ZBTB16	0.53
RGS5	0.53
HSD17B6	0.53
TNFSF14	0.53
WISP2	0.53
ARHGEF6	0.53
MICAL2	0.53
RAPGEF2	0.53
SLC34A2	0.53
LILRB5	0.53
FILIP1L	0.53
LILRA6	0.53
NDNF	0.53
TPCN1	0.53
APBB1IP	0.53
WBP1L	0.53
SSC5D	0.53
LRP2BP	0.53
RFTN1	0.53
DAAM2	0.53
SFTA3	0.53
SLC24A4	0.53
CYTH4	0.53
VENTX	0.53
TNS3	0.53
ADARB1	0.52
AQP4	0.52
C3AR1	0.52
CTSZ	0.52
CX3CR1	0.52
FGR	0.52
FPR3	0.52
CYR61	0.52
ITGB3	0.52
SMAD7	0.52
MAP3K3	0.52
MFNG	0.52
PTH1R	0.52
PYGM	0.52
SLA	0.52
TAGLN	0.52
PTCRA	0.52
LAPTM5	0.52
SEMA6B	0.52
CXORF21	0.52
ATOH8	0.52
ZCCHC24	0.52
CAMK1G	0.52
ATP10A	0.52
EXOC3L2	0.52
FMNL3	0.52
ADGRA2	0.52
GIPC3	0.52
GPR132	0.52
SFTPA1	0.52
DPEP2	0.52
ADPRH	0.51
LRRN4	0.51
BTK	0.51
ENTPD1	0.51
FCGR2A	0.51
KDR	0.51
MFAP4	0.51
TIMP2	0.51
VIPR1	0.51
LAT2	0.51
DYSF	0.51
FZD4	0.51
RASSF2	0.51
SFTA1P	0.51
EMILIN1	0.51
FAT4	0.51
TMEM106A	0.51
CD300LG	0.51
DOCK8	0.51
DACT3	0.51
PLVAP	0.51
CRISPLD2	0.51
MFSD7	0.51
AHCYL2	0.51
MS4A7	0.51
SNX20	0.51
SHE	0.51
AOX1	0.5
ARSB	0.5
CACNA1C	0.5
CD86	0.5
CD37	0.5
CSF2RA	0.5
FMOD	0.5
GP9	0.5
HLA-DPA1	0.5
HLA-DPB1	0.5
IL16	0.5
LYL1	0.5
MYL3	0.5
ROR1	0.5
PDGFRA	0.5
SLC12A4	0.5
STK10	0.5
TK2	0.5
MMP23B	0.5
TNFSF13	0.5
F2RL3	0.5
SECISBP2L	0.5
GIT2	0.5
RCAN2	0.5
ABCA9	0.5
MYL9	0.5
PTPN21	0.5
ZNF385D	0.5
KIAA0226L	0.5
SFXN3	0.5
VASN	0.5
EMILIN2	0.5
TLR7	0.5
BIN2	0.5
NFAM1	0.5
GLIPR2	0.5
SASH3	0.5
LINC00469	0.5
LILRA4	0.5
IGDCC4	0.5
PPP1R16B	0.5
OSCAR	0.5
ARHGDIB	0.49
ARRB2	0.49
CD68	0.49
CEACAM8	0.49
CISH	0.49
CR1	0.49
CYBB	0.49
ELANE	0.49
FOSB	0.49
GYPE	0.49
ITGA1	0.49
KCNJ8	0.49
LAMA4	0.49
MNDA	0.49
SCN1A	0.49
ACOX2	0.49
CCR2	0.49
SFTPA2	0.49
GAB3	0.49
SLC9A3R2	0.49
SORBS1	0.49
IFITM2	0.49
PNMA2	0.49
LILRB1	0.49
VEPH1	0.49
PIK3R6	0.49
C1QTNF7	0.49
CYYR1	0.49
MGC27382	0.49
ABI3	0.49
FAM198B	0.49
PRAM1	0.49
DLL4	0.49
RSPO1	0.49
DOCK10	0.49
CARD8	0.49
APOBR	0.49
ANGPTL2	0.49
HMHA1	0.49
HECW2	0.49
SAMHD1	0.49
NAPSB	0.49
FOXP1	0.49
TMEM176B	0.49
PDLIM2	0.49
ARRB1	0.48
COL6A6	0.48
CAV3	0.48
TNFSF8	0.48
CD33	0.48
CD74	0.48
ADGRE5	0.48
CDH11	0.48
CYP27A1	0.48
PHC2	0.48
GYPC	0.48
ICAM2	0.48
CFI	0.48
ITGB2	0.48
MITF	0.48
PRKCB	0.48
GAPT	0.48
RGS3	0.48
KCNAB2	0.48
NRP1	0.48
ZBTB46	0.48
HS3ST2	0.48
PLXNC1	0.48
IKZF1	0.48
SPON1	0.48
MXD4	0.48
VSIG4	0.48
SCRG1	0.48
TNFSF12-TNFSF13	0.48
AKNA	0.48
KCTD10	0.48
RASSF4	0.48
MS4A4A	0.48
MS4A14	0.48
KIAA1755	0.48
MILR1	0.48
PLAC9	0.48
PLA2G15	0.48
FLRT3	0.48
CNRIP1	0.48
GJD3	0.48
EFEMP2	0.48
C10ORF54	0.48
VSTM4	0.47
AIF1	0.47
BGN	0.47
FBLN2	0.47
SGMS2	0.47
HLA-DOA	0.47
LPL	0.47
NCF4	0.47
OGN	0.47
PLA2G2A	0.47
SCTR	0.47
CCL21	0.47
SLC6A4	0.47
SLC22A3	0.47
SIGLEC1	0.47
TGFB1I1	0.47
WIPF1	0.47
RECK	0.47
MBL1P	0.47
DCHS1	0.47
FCGR2C	0.47
LY86	0.47
NAPSA	0.47
SDC3	0.47
KLRG1	0.47
FSTL3	0.47
RAI2	0.47
PEAK1	0.47
NRROS	0.47
AZIN2	0.47
APOLD1	0.47
STAC3	0.47
BTBD19	0.47
HIGD1B	0.47
MXRA8	0.47
PHLDB1	0.47
PLCL2	0.47
GPRIN3	0.47
ABCA6	0.47
SLAMF8	0.47
KCNK17	0.47
CD248	0.47
FGD2	0.47
PLXNA4	0.47
CD300LB	0.47
TPK1	0.47
ST6GALNAC6	0.47
ABCC6	0.46
ASPA	0.46
IGIP	0.46
CAPN3	0.46
CCR5	0.46
GGT5	0.46
HK3	0.46
HLA-DRB6	0.46
IL7R	0.46
ITGAM	0.46
PDGFRB	0.46
PER1	0.46
SFRP2	0.46
KMO	0.46
SELENBP1	0.46
LPXN	0.46
TESPA1	0.46
NOD1	0.46
SMPDL3A	0.46
FERMT2	0.46
PKIG	0.46
RASSF1	0.46
TNFAIP8L2	0.46
CD300LF	0.46
SIDT2	0.46
ZMYND15	0.46
TAGAP	0.46
HAVCR2	0.46
ZNF331	0.46
MPRIP	0.46
ZFPM2	0.46
TMEM88	0.46
DENND2A	0.46
PIEZO2	0.46
ADORA2A	0.45
ALDH3B1	0.45
C1QC	0.45
CD40LG	0.45
CD53	0.45
CSF3R	0.45
GPR183	0.45
EVI2B	0.45
FIGF	0.45
FOXS1	0.45
FLT1	0.45
GNGT2	0.45
INPP5D	0.45
JAK3	0.45
KCNMB1	0.45
LCP1	0.45
MCAM	0.45
MMP2	0.45
LGMN	0.45
PTPRC	0.45
RNASE6	0.45
CLEC4C	0.45
SPARC	0.45
STAT5A	0.45
THY1	0.45
GRAPL	0.45
VIM	0.45
ST3GAL5	0.45
S1PR2	0.45
TRANK1	0.45
GFPT2	0.45
CLEC4M	0.45
TNFSF13B	0.45
FAM109A	0.45
EFCC1	0.45
CD300E	0.45
RAB8B	0.45
RASSF3	0.45
GNG2	0.45
MARCH1	0.45
ATP11A	0.45
RETN	0.45
CALCOCO1	0.45
MYADM	0.45
C11ORF96	0.45
BHLHE22	0.45
VGLL3	0.45
C1QA	0.44
DMBT1	0.44
ECM2	0.44
FCGR2B	0.44
FCGR3A	0.44
FGF7	0.44
PRICKLE2	0.44
HLA-DMA	0.44
CD180	0.44
PDE2A	0.44
PLCB2	0.44
PRELP	0.44
ROS1	0.44
CXCL12	0.44
SIPA1	0.44
SLCO2A1	0.44
ZEB1	0.44
TIMP3	0.44
TYROBP	0.44
CPZ	0.44
PAPSS2	0.44
KL	0.44
FAM65B	0.44
IP6K1	0.44
MRC2	0.44
CITED2	0.44
NEK6	0.44
TMEM86A	0.44
ZFP2	0.44
SPRY4	0.44
FERMT3	0.44
TLR8	0.44
GLIS2	0.44
ADAP2	0.44
LMO3	0.44
MSRB3	0.44
AOC4P	0.44
CMTM3	0.44
SCARF2	0.44
ANKRD44	0.44
CHRDL1	0.44
PRDM6	0.44
FHOD1	0.44
C11ORF21	0.44
ADGRE2	0.44
PARVG	0.44
HHIP	0.44
AEBP1	0.43
AGRP	0.43
ALOX5AP	0.43
ARHGAP6	0.43
AXL	0.43
CHI3L2	0.43
TPP1	0.43
CCR6	0.43
COL4A3	0.43
EXTL1	0.43
F13A1	0.43
FLT3	0.43
GDF10	0.43
GNG7	0.43
ITGAX	0.43
LCP2	0.43
NRGN	0.43
PIK3CG	0.43
PTAFR	0.43
PTGER2	0.43
PTPRE	0.43
SKI	0.43
TIMP1	0.43
CD84	0.43
ADAMTS4	0.43
DOCK4	0.43
ARHGAP25	0.43
GPC6	0.43
SPRY1	0.43
SIRPB1	0.43
IFI30	0.43
C10ORF10	0.43
IRAK3	0.43
AKAP13	0.43
SVEP1	0.43
MYBPHL	0.43
OSBPL5	0.43
ARAP1	0.43
SPTLC3	0.43
MMRN1	0.43
WWC1	0.43
NLRP12	0.43
KCNU1	0.43
CNTN6	0.43
SCIMP	0.43
SFTA2	0.43
TMEM236	0.43
GORASP1	0.43
RASAL3	0.43
CD28	0.42
CEACAM4	0.42
DAB2	0.42
ELK3	0.42
MS4A2	0.42
FCER1G	0.42
FES	0.42
FOXF1	0.42
FOLR2	0.42
FUT7	0.42
XCR1	0.42
NDST1	0.42
LTBP2	0.42
MOCS1	0.42
NAIP	0.42
NFATC2	0.42
SERPINA1	0.42
PTGDR	0.42
RSU1	0.42
SNAI1	0.42
VAV1	0.42
VDR	0.42
COLQ	0.42
LCNL1	0.42
CCRL2	0.42
SIGLEC14	0.42
ME3	0.42
LILRA2	0.42
CORO1A	0.42
LDB3	0.42
FYCO1	0.42
ARMC9	0.42
GCOM1	0.42
TRIM8	0.42
IL21R	0.42
HDAC7	0.42
COX4I2	0.42
KNDC1	0.42
ZNF385B	0.42
CCDC80	0.42
SIGLEC17P	0.42
CRTAC1	0.42
FGD3	0.42
P2RY8	0.42
SLC43A2	0.42
GVINP1	0.42
ACP5	0.41
ANPEP	0.41
ATP6V1B2	0.41
AVPR2	0.41
COL3A1	0.41
COL15A1	0.41
CPB2	0.41
CSF1	0.41
CTSS	0.41
STX2	0.41
FBP1	0.41
GNG11	0.41
CXCL2	0.41
HLA-DQA2	0.41
IGFBP4	0.41
IL6ST	0.41
ILK	0.41
JAK1	0.41
LAMA2	0.41
MSR1	0.41
NBL1	0.41
PCOLCE	0.41
PDC	0.41
PKD2	0.41
POU6F1	0.41
PSAP	0.41
RNASE1	0.41
SFTPB	0.41
SLC6A12	0.41
SLC12A3	0.41
TPM1	0.41
MAP3K12	0.41
GPR65	0.41
ADAM19	0.41
GRAP2	0.41
SH3BP5	0.41
PDE4DIP	0.41
MACROD2	0.41
BTN3A3	0.41
ARL6IP5	0.41
ZC3H12D	0.41
LINC00924	0.41
BTBD9	0.41
TM4SF18	0.41
SLC41A2	0.41
FAM71A	0.41
PLA1A	0.41
EVL	0.41
SHANK3	0.41
SHISA3	0.41
BTNL9	0.41
RASA3	0.41
ARHGEF40	0.41
ADAMTS9	0.41
SIGLEC10	0.41
CEACAM21	0.41
WFDC1	0.41
NKAPL	0.41
GBGT1	0.41
CC2D2B	0.41
ST7-AS2	0.41
RGCC	0.41
APBB2	0.4
C1QB	0.4
C4BPA	0.4
C8B	0.4
CALD1	0.4
RUNX1T1	0.4
CD5	0.4
CCR4	0.4
COL4A1	0.4
CYP4B1	0.4
EVC	0.4
F8	0.4
FAP	0.4
FCGR1A	0.4
FCGRT	0.4
GRIA1	0.4
MCEMP1	0.4
ICAM1	0.4
ITGAL	0.4
LTC4S	0.4
MGAT1	0.4
MTHFR	0.4
PTPRM	0.4
RASGRF2	0.4
RNASE4	0.4
LEFTY2	0.4
THBS3	0.4
PPP1R18	0.4
CLDN5	0.4
IL18R1	0.4
FAM189A2	0.4
LPIN2	0.4
SIRPA	0.4
TSPAN32	0.4
TMEM173	0.4
CORO7	0.4
BTNL8	0.4
C3ORF36	0.4
SLC19A3	0.4
GDPD5	0.4
HMCN1	0.4
SLC15A3	0.4
AGAP2	0.4
P2RY13	0.4
FAM105A	0.4
SMIM10	0.4
ARHGAP17	0.4
SLC29A3	0.4
CYP1B1-AS1	0.4
ARHGAP15	0.4
CPXM1	0.4
PRND	0.4
PLD4	0.4
HEG1	0.4
STARD13	0.4
CADM3	0.4
C19ORF38	0.4
FIBIN	0.4
BRE-AS1	0.4
PINK1	0.4
ANXA5	0.39
NLRC3	0.39
SIGLEC6	0.39
FYN	0.39
GUCY1A3	0.39
HLA-E	0.39
IGFBP7	0.39
ISLR	0.39
ITGA4	0.39
ITIH4	0.39
LAMB2	0.39
LCAT	0.39
MT1M	0.39
SPNS3	0.39
OTC	0.39
PSKH1	0.39
RAB27A	0.39
RNASE2	0.39
CLEC11A	0.39
CCL18	0.39
SFRP4	0.39
STAT4	0.39
GXYLT2	0.39
TPM2	0.39
XPNPEP2	0.39
NLRP6	0.39
C9ORF139	0.39
S1PR4	0.39
SIGLEC5	0.39
CYTH3	0.39
ITGBL1	0.39
GMFG	0.39
CYTIP	0.39
PHACTR2	0.39
MVP	0.39
LAMC3	0.39
CPQ	0.39
CLEC10A	0.39
KIF1C	0.39
HCST	0.39
TREML1	0.39
FAM65A	0.39
LINC00341	0.39
BICC1	0.39
C16ORF89	0.39
SLC26A9	0.39
AMOTL2	0.39
HVCN1	0.39
PLPP7	0.39
SYDE1	0.39
SH3TC1	0.39
BANK1	0.39
ENOX1	0.39
BMP2K	0.39
FCGR1C	0.39
OLFML2B	0.39
GREM1	0.39
CAPN8	0.39
CD209	0.39
CARD9	0.39
ARHGAP9	0.39
IKZF4	0.39
MICAL1	0.39
PLEKHG2	0.39
ACTG2	0.38
CD80	0.38
CD52	0.38
CHN1	0.38
COL5A1	0.38
CTSE	0.38
CYP1B1	0.38
CFD	0.38
EBF1	0.38
EDNRA	0.38
EMP3	0.38
FCGR1B	0.38
FPR1	0.38
FAM129C	0.38
ITGA7	0.38
CFAP221	0.38
AFF3	0.38
MAG	0.38
MFGE8	0.38
NCF2	0.38
NNMT	0.38
P2RX7	0.38
SCN1B	0.38
SH3BGRL	0.38
ADAMTS16	0.38
THBS2	0.38
TNR	0.38
UBA7	0.38
COL14A1	0.38
EVI5	0.38
PLA2G7	0.38
FCHSD2	0.38
TRIM22	0.38
FGL2	0.38
EHD1	0.38
UBQLNL	0.38
CCDC92	0.38
APOL3	0.38
SIGLEC11	0.38
CYGB	0.38
C1QTNF2	0.38
GLT8D2	0.38
LAP3	0.38
CALHM2	0.38
PLXDC2	0.38
DNAJC5B	0.38
TM6SF1	0.38
TLR9	0.38
PPM1K	0.38
ACSM5	0.38
XKR8	0.38
TMEM140	0.38
NID2	0.38
FRMD4A	0.38
PDZRN3	0.38
SAMD4A	0.38
SH3PXD2B	0.38
C14ORF132	0.38
MAN1C1	0.38
ZFYVE28	0.38
AGBL1	0.38
CXCL16	0.38
CREB3L1	0.38
ZNF521	0.38
ANKRD1	0.38
CPAMD8	0.38
TMEM233	0.38
TMEM220	0.38
SNORA25	0.38
SLC5A8	0.38
KLF17	0.38
NCF1	0.38
MS4A6A	0.38
ACADL	0.37
ADRA2A	0.37
AMY1A	0.37
APOC4	0.37
ZFP36L2	0.37
KLF9	0.37
CD1D	0.37
CCR7	0.37
COL6A3	0.37
KLF6	0.37
FHL3	0.37
HLA-DMB	0.37
NR4A1	0.37
ITK	0.37
MAP4	0.37
MYL4	0.37
PLA2G1B	0.37
PLEK	0.37
POU2F2	0.37
NPY4R	0.37
RARA	0.37
RARRES2	0.37
CCL16	0.37
SLC16A2	0.37
SLC35E2B	0.37
ZYX	0.37
SNX30	0.37
NDST2	0.37
SOCS3	0.37
IL1RL1	0.37
FCMR	0.37
ACAP1	0.37
IL18BP	0.37
RASA4	0.37
LILRB4	0.37
LZTS1	0.37
FAM101A	0.37
PODNL1	0.37
TRAF3IP3	0.37
LOC441204	0.37
FCHO2	0.37
FOXP3	0.37
SNX25	0.37
ANGPT4	0.37
PPP1R9B	0.37
LOXL3	0.37
TRIM34	0.37
ADGRD1	0.37
ZNF763	0.37
KIF21B	0.37
PAG1	0.37
SASH1	0.37
TMEM2	0.37
ADGRG5	0.37
FNIP2	0.37
ARHGAP22	0.37
GIMAP2	0.37
RND1	0.37
SH3KBP1	0.37
TRABD2A	0.37
RFTN2	0.37
NCF1B	0.37
ADD1	0.36
ADORA1	0.36
RHOH	0.36
CD6	0.36
PLK3	0.36
COL4A2	0.36
COL6A2	0.36
COL8A1	0.36
CTGF	0.36
CTSD	0.36
ITPR2	0.36
KCNJ5	0.36
MAN2B1	0.36
CIITA	0.36
MYLK	0.36
SGCA	0.36
SGCD	0.36
TLR4	0.36
LOC401463	0.36
PDLIM7	0.36
CD101	0.36
ITM2A	0.36
AKAP12	0.36
HEPH	0.36
DCANP1	0.36
TSPAN2	0.36
FICD	0.36
FSTL1	0.36
MGLL	0.36
HEXA-AS1	0.36
ORAI2	0.36
OTOA	0.36
ST6GALNAC5	0.36
ATP6V0D2	0.36
APH1B	0.36
DACT1	0.36
SUFU	0.36
ACSL5	0.36
TCF23	0.36
GPBAR1	0.36
UBASH3A	0.36
GPR84	0.36
C16ORF54	0.36
TFEC	0.36
ARRDC5	0.36
NECAP2	0.36
ZHX3	0.36
RGL1	0.36
MGRN1	0.36
COTL1	0.36
CLEC5A	0.36
MAP3K7CL	0.36
KLHL6	0.36
PAPLN	0.36
JMJD1C	0.36
ATP8B2	0.36
SFMBT2	0.36
PEBP4	0.36
HPGDS	0.36
EDA2R	0.36
CACNA2D4	0.36
POM121L9P	0.36
ICOS	0.36
LMCD1	0.36
POPDC2	0.36
SAMSN1	0.36
RGS18	0.36
CDK15	0.36
ACTB	0.35
AMPD3	0.35
APBB1	0.35
AQP9	0.35
C2	0.35
CA3	0.35
CMA1	0.35
COL1A2	0.35
COL16A1	0.35
CTSK	0.35
SARDH	0.35
ELN	0.35
ENPEP	0.35
EPS15	0.35
FBN1	0.35
TTC21A	0.35
GNS	0.35
HNMT	0.35
IL12RB1	0.35
ITGA9	0.35
ITGB6	0.35
KCNQ1	0.35
MEF2D	0.35
PDE4B	0.35
PTGER4	0.35
ACSM3	0.35
SLAMF1	0.35
SMPD1	0.35
ABRA	0.35
TGFB3	0.35
TFEB	0.35
PLPP3	0.35
NCOR2	0.35
EDEM1	0.35
ISM1	0.35
TCIRG1	0.35
ADAMTS6	0.35
CD300A	0.35
MLPH	0.35
C1ORF54	0.35
DENND1C	0.35
LOC115110	0.35
C8ORF34	0.35
C3ORF18	0.35
TAOK3	0.35
ANTXR1	0.35
SGIP1	0.35
FKBP7	0.35
CECR1	0.35
RASGEF1B	0.35
LRRC36	0.35
ACOXL	0.35
GALNT10	0.35
TCF25	0.35
CSGALNACT1	0.35
LRCH1	0.35
SEPT6	0.35
RTKN2	0.35
ZNF438	0.35
PLXDC1	0.35
SERINC1	0.35
MKL1	0.35
DDX60L	0.35
ABI3BP	0.35
PCDHGA12	0.35
KCNG2	0.35
NTN4	0.35
SPECC1	0.35
PDLIM3	0.35
P2RY10	0.35
LOC388692	0.35
EPSTI1	0.35
ITPRIPL2	0.35
LGI4	0.35
ACP2	0.34
ADORA3	0.34
ALDH2	0.34
ASAH1	0.34
CDR1	0.34
PPM1M	0.34
COL1A1	0.34
COL8A2	0.34
CRY2	0.34
CTSL	0.34
DOK1	0.34
DUSP1	0.34
F10	0.34
GAS1	0.34
GLI3	0.34
CXCR3	0.34
GPR21	0.34
GZMK	0.34
CFH	0.34
HSD11B1	0.34
ITPR1	0.34
FAM151B	0.34
KIFC3	0.34
LEPR	0.34
LRP1	0.34
LTB	0.34
MYD88	0.34
MYO9B	0.34
OLR1	0.34
P2RX1	0.34
CDK14	0.34
RCVRN	0.34
SNAI3	0.34
SLC6A1	0.34
CMAHP	0.34
KAT2B	0.34
ALDH1A2	0.34
ARHGAP29	0.34
LITAF	0.34
GPRIN2	0.34
P2RY14	0.34
IGSF6	0.34
ATP8A1	0.34
VAMP5	0.34
TBC1D10C	0.34
SMCO3	0.34
PARP8	0.34
CLMP	0.34
ZNF671	0.34
CYBRD1	0.34
CCDC68	0.34
COL18A1	0.34
CTHRC1	0.34
FAM107B	0.34
FNDC1	0.34
DIXDC1	0.34
CCL3L3	0.34
P4HA3	0.34
CLEC9A	0.34
SH3D19	0.34
TREM2	0.34
WWC2-AS2	0.34
TMEM100	0.34
RAB11FIP2	0.34
RAB20	0.34
CCDC141	0.34
ABLIM3	0.34
FNBP1	0.34
TBC1D1	0.34
ZNF454	0.34
MMD	0.34
STX12	0.34
LOC646999	0.34
TP73-AS1	0.34
SPATA13	0.34
SLC39A13	0.34
PTPN22	0.34
ABCC6P1	0.34
XYLT1	0.34
RBSN	0.34
CIB4	0.34
AMY2A	0.33
LRRC15	0.33
CXCR5	0.33
CD72	0.33
CCR8	0.33
COL5A2	0.33
SLC31A2	0.33
CTLA4	0.33
DPT	0.33
FN1	0.33
GGT3P	0.33
GNA12	0.33
AFAP1L1	0.33
HOXA5	0.33
HRH2	0.33
ICAM3	0.33
IFNAR2	0.33
INSL3	0.33
KCND3	0.33
KCNK3	0.33
MCL1	0.33
PGR	0.33
SRGN	0.33
RORC	0.33
CCL22	0.33
ITSN1	0.33
HTRA4	0.33
STK4	0.33
TACC1	0.33
NR2F2	0.33
TLR2	0.33
TPSAB1	0.33
VEGFC	0.33
DEFA1B	0.33
WNT2	0.33
NR4A3	0.33
ENC1	0.33
UNC5C	0.33
CDKL2	0.33
ATP6V0D1	0.33
SLC16A6	0.33
CLCA3P	0.33
RHOBTB1	0.33
CORO2B	0.33
POSTN	0.33
CLEC4D	0.33
CYSLTR1	0.33
BTN2A1	0.33
MCTP1	0.33
GLDN	0.33
JADE1	0.33
TXNDC5	0.33
SLAMF6	0.33
LOC606724	0.33
SAMD11	0.33
C1RL	0.33
GMIP	0.33
CHIAP2	0.33
GALNT15	0.33
CREBRF	0.33
KIF26B	0.33
TMEM176A	0.33
ITGA11	0.33
CLEC16A	0.33
PCDHGA5	0.33
BDH2	0.33
RANBP10	0.33
PI16	0.33
NCKAP5L	0.33
CLIC4	0.33
DNAH1	0.33
CLEC4E	0.33
TMEM130	0.33
ARRDC2	0.33
PCED1B-AS1	0.33
C16ORF86	0.33
WTIP	0.33
FAM180A	0.33
TBX21	0.33
MMP25	0.33
PLEKHH2	0.33
GALM	0.33
AK1	0.32
ALPL	0.32
LDLRAD4	0.32
CD63	0.32
CD69	0.32
CTSG	0.32
DCN	0.32
DYNC1LI2	0.32
S1PR3	0.32
FBLN1	0.32
SP110	0.32
LRP2	0.32
LSAMP	0.32
LYZ	0.32
NFKBIE	0.32
PDE1A	0.32
PF4	0.32
PRRG1	0.32
ST5	0.32
WFS1	0.32
ZNF154	0.32
LUZP1	0.32
CXCR4	0.32
SSPN	0.32
KCNK5	0.32
DOCK11	0.32
TNFRSF14	0.32
TNFRSF10C	0.32
PKD2L1	0.32
CCM2L	0.32
ADAMTS14	0.32
TOM1	0.32
KRTAP20-2	0.32
IFITM3	0.32
NPC2	0.32
IQGAP2	0.32
ADAMTS7	0.32
SLC2A6	0.32
SP140	0.32
TWF2	0.32
SLC8B1	0.32
CLEC4GP1	0.32
C1QTNF6	0.32
CHST11	0.32
SLC30A7	0.32
ARHGEF3	0.32
TMEM133	0.32
PLEKHO1	0.32
TM6SF2	0.32
SHC3	0.32
BTLA	0.32
BCRP3	0.32
ARHGEF38	0.32
LOC644936	0.32
NLRP1	0.32
PLEKHM2	0.32
DMXL2	0.32
PIP5K1C	0.32
LMOD3	0.32
SCARA5	0.32
MARCH8	0.32
C10ORF25	0.32
HAMP	0.32
CCDC149	0.32
TICAM2	0.32
TECPR1	0.32
CDYL2	0.32
WDR81	0.32
CADPS2	0.32
NALCN	0.32
IL4I1	0.32
VSTM2L	0.32
MTMR14	0.32
RAB37	0.32
NCF1C	0.32
ADCY7	0.31
AMPD2	0.31
APOE	0.31
CACNB2	0.31
RUNX2	0.31
CD1C	0.31
CLIC2	0.31
CNR2	0.31
VCAN	0.31
PARP15	0.31
TSC22D3	0.31
MEGF6	0.31
EVI2A	0.31
F2R	0.31
FKBP5	0.31
FLNA	0.31
EMB	0.31
FUCA1	0.31
GLRX	0.31
GPR34	0.31
HLA-DRA	0.31
HLX	0.31
HPR	0.31
HSPG2	0.31
HYAL1	0.31
IGF1	0.31
SLFNL1	0.31
IL10	0.31
IRF4	0.31
ITGB7	0.31
KLKB1	0.31
LGALS1	0.31
PPP1R12B	0.31
PLCG2	0.31
PTGER1	0.31
QSOX1	0.31
PTPRG	0.31
RRAD	0.31
RRAS	0.31
ATXN1	0.31
SLC8A1	0.31
TNFAIP6	0.31
TNNC1	0.31
NUTM2A	0.31
UTRN	0.31
VCAM1	0.31
BEST1	0.31
SEC22C	0.31
ADAMTS2	0.31
SEC24D	0.31
PLPPR4	0.31
ARHGAP44	0.31
CTDSP2	0.31
TNIP1	0.31
BTN2A2	0.31
ATG7	0.31
SDS	0.31
RBPMS	0.31
RAB31	0.31
RIPK3	0.31
BTN3A1	0.31
PVRIG	0.31
C1ORF116	0.31
ARHGAP10	0.31
TMEM110	0.31
FCRL6	0.31
LBH	0.31
MS4A6E	0.31
CSMD2	0.31
TAS2R10	0.31
NICN1	0.31
CAB39	0.31
RBPMS2	0.31
ZNF843	0.31
BTN2A3P	0.31
FAM46A	0.31
FNDC3A	0.31
PARVA	0.31
RNF130	0.31
SULF1	0.31
GJC2	0.31
ZNFX1	0.31
LRRN4CL	0.31
C20ORF166-AS1	0.31
FAM162B	0.31
KIAA1456	0.31
NBPF10	0.31
RNF19A	0.31
MOXD1	0.31
RNF144B	0.31
CABLES1	0.31
SPNS2	0.31
C8ORF48	0.31
NAAA	0.31
AFAP1	0.31
ARHGAP18	0.31
CLECL1	0.31
LIX1L	0.31
TMEM125	0.31
GMPPB	0.31
NECAB1	0.31
ADGRE4P	0.31
ZNF781	0.31
ADCY6	0.3
AP2A2	0.3
BIRC3	0.3
APOC1	0.3
BMP2	0.3
CCIN	0.3
CD2	0.3
CD3E	0.3
CD247	0.3
CD22	0.3
CD79B	0.3
CLCN6	0.3
CREBL2	0.3
CSRP1	0.3
DLG4	0.3
DPYD	0.3
ADGRE1	0.3
FRZB	0.3
FYB	0.3
GATA2	0.3
GUCY1A2	0.3
HSPB2	0.3
RBPJ	0.3
IL2RG	0.3
IL4R	0.3
LTA4H	0.3
MEFV	0.3
MPP1	0.3
NINJ2	0.3
BMPER	0.3
PBX3	0.3
PDE7A	0.3
PHKG1	0.3
PIK3CD	0.3
PODXL	0.3
PTEN	0.3
PVRL2	0.3
CCL13	0.3
SLC1A1	0.3
VCL	0.3
SEMA3B	0.3
LST1	0.3
PTP4A2	0.3
GPR68	0.3
FAM198A	0.3
SLC4A4	0.3
MAGI1	0.3
GPR55	0.3
RAB33A	0.3
TBX4	0.3
SH3PXD2A	0.3
SNPH	0.3
PIEZO1	0.3
PABPC5	0.3
MBNL2	0.3
RAPGEF3	0.3
FFAR4	0.3
MTMR9LP	0.3
CCDC36	0.3
HECTD3	0.3
IGFLR1	0.3
PQLC1	0.3
ALPK1	0.3
PREX2	0.3
HAPLN3	0.3
C5ORF56	0.3
ITIH5	0.3
PGM5-AS1	0.3
LACTB	0.3
PSMG3-AS1	0.3
C1QTNF1	0.3
SH3RF3	0.3
IL27	0.3
LINC00426	0.3
ESYT3	0.3
CERCAM	0.3
PRR16	0.3
CHST15	0.3
KLF13	0.3
RELT	0.3
SLC46A3	0.3
PALMD	0.3
LGI2	0.3
TMEM57	0.3
CSGALNACT2	0.3
DENND3	0.3
SBNO2	0.3
SHANK2	0.3
TENM3	0.3
UNC5B	0.3
FGD4	0.3
ZFYVE26	0.3
PMEPA1	0.3
FAM20C	0.3
SLC39A12	0.3
KLHDC1	0.3
TBC1D24	0.3
KIAA1211	0.3
TDRD6	0.3
ZBTB4	0.3
PXDC1	0.3
GPR141	0.3
LOC91450	0.3
CLIP3	0.3
SUSD5	0.3
GPR82	0.3
SMPDL3B	0.3
YPEL2	0.3
PPP1R14A	0.3
SLC43A3	0.3
GPR171	0.3
SYNE3	0.3
SIRPD	0.3
SPRED1	0.3
NPFFR1	0.3
ACAN	0.29
FAS	0.29
MLKL	0.29
C1R	0.29
CAPZB	0.29
CD81	0.29
CFL2	0.29
COL6A1	0.29
CYLD	0.29
DEFA4	0.29
EVC2	0.29
GANC	0.29
GAS6	0.29
GBP3	0.29
GYPB	0.29
KCNN2	0.29
MUC1	0.29
MYO1C	0.29
NOS3	0.29
PDE6G	0.29
HTRA1	0.29
RPS6KA1	0.29
SH3BP2	0.29
SULT1C2	0.29
HNF1B	0.29
THBS1	0.29
C20ORF202	0.29
SEMA7A	0.29
CILP	0.29
MMP23A	0.29
RIPK2	0.29
ARHGEF1	0.29
NOG	0.29
CD83	0.29
CYP7B1	0.29
GNA14	0.29
KIAA0513	0.29
ACAA2	0.29
FAM114A2	0.29
MAPRE2	0.29
PTP4A3	0.29
NISCH	0.29
CCNJL	0.29
RUFY1	0.29
SPATC1	0.29
TSPAN11	0.29
CLEC4A	0.29
MARVELD1	0.29
CELA2B	0.29
EVA1A	0.29
SLA2	0.29
CXXC5	0.29
MYOZ2	0.29
IGSF21	0.29
ERRFI1	0.29
PRTG	0.29
TOR4A	0.29
RASIP1	0.29
MARC2	0.29
STAB2	0.29
WDTC1	0.29
ZSWIM8	0.29
VPS11	0.29
MAN2B2	0.29
ZNF281	0.29
AMZ1	0.29
ANKRD50	0.29
ANGPTL5	0.29
SORCS2	0.29
TSHZ3	0.29
PAXIP1-AS2	0.29
LILRA5	0.29
PKDCC	0.29
SIT1	0.29
MFSD12	0.29
TADA2B	0.29
TPSB2	0.29
RILPL2	0.29
ADAM8	0.28
AMY2B	0.28
ANK2	0.28
AQP8	0.28
RHOA	0.28
RHOG	0.28
PATL2	0.28
BMP1	0.28
CD36	0.28
CHI3L1	0.28
COL10A1	0.28
CYP27B1	0.28
DAPK1	0.28
SEPT1	0.28
FCAR	0.28
GPR20	0.28
FFAR3	0.28
HABP2	0.28
HLA-DQB1	0.28
HLA-DRB1	0.28
IFIT2	0.28
IL2	0.28
IL2RA	0.28
IRF7	0.28
ITGA5	0.28
KLRB1	0.28
LIPA	0.28
LRPAP1	0.28
MYH10	0.28
UNC13D	0.28
NFE2	0.28
DDR2	0.28
PDGFRL	0.28
UBL3	0.28
TIFAB	0.28
PTPRCAP	0.28
SCT	0.28
CCL2	0.28
SLC2A5	0.28
SNTB1	0.28
SUSD3	0.28
ZCCHC5	0.28
VAMP2	0.28
TRPC3	0.28
NUTM2D	0.28
TNFRSF4	0.28
ZNF224	0.28
ACOX3	0.28
PDE5A	0.28
STX11	0.28
WISP1	0.28
SLC7A6	0.28
SLC16A4	0.28
QKI	0.28
CTIF	0.28
ZBTB40	0.28
WDR1	0.28
NR1H3	0.28
ACTR1A	0.28
NMUR1	0.28
SEMA3C	0.28
PNRC1	0.28
PRSS23	0.28
ZC3H12B	0.28
ZBED2	0.28
BIRC7	0.28
ANKRD55	0.28
LONRF3	0.28
PLIN5	0.28
ADAM33	0.28
KIAA1683	0.28
CMTM1	0.28
GRIP2	0.28
ZBP1	0.28
LINC00310	0.28
SLC27A1	0.28
UNC93B1	0.28
ADAMTS12	0.28
ALPK2	0.28
RILP	0.28
SHANK1	0.28
RBP5	0.28
ZNF347	0.28
ZNF876P	0.28
SOWAHD	0.28
SSH1	0.28
PTRF	0.28
BNC2	0.28
LAX1	0.28
UACA	0.28
MLXIP	0.28
WDR37	0.28
CNDP2	0.28
PDZD2	0.28
GRAMD4	0.28
KIF13B	0.28
PCDHGA2	0.28
CADM1	0.28
TTC7A	0.28
ZNF608	0.28
CEP126	0.28
FAM26E	0.28
GRAMD1A	0.28
CPNE5	0.28
HIVEP3	0.28
SNORA71B	0.28
SCML4	0.28
CHIA	0.28
TRAPPC11	0.28
CLEC17A	0.28
HTRA3	0.28
REM1	0.28
RRN3P2	0.28
TRIM61	0.28
ACAA1	0.27
ACTN2	0.27
PLIN2	0.27
STS	0.27
ASGR1	0.27
RERE	0.27
CAPG	0.27
RCBTB2	0.27
CTNS	0.27
DNAH8	0.27
DPP4	0.27
ERN1	0.27
FLT3LG	0.27
FMO2	0.27
FOS	0.27
GALC	0.27
GRM6	0.27
HTT	0.27
HLA-J	0.27
IL2RB	0.27
TNFRSF9	0.27
ITGB1	0.27
LGALS2	0.27
LOXL2	0.27
LSP1	0.27
AFF1	0.27
MMP14	0.27
MSN	0.27
RGL4	0.27
NTRK1	0.27
TMEM192	0.27
QDPR	0.27
RAC2	0.27
RBP4	0.27
CCL3	0.27
SP100	0.27
WNT9B	0.27
XPC	0.27
ZFP36	0.27
DPF3	0.27
AGAP5	0.27
PSTPIP1	0.27
PCSK7	0.27
GATA5	0.27
CBLN4	0.27
RGS19	0.27
CXCR6	0.27
CORIN	0.27
PHTF1	0.27
NEU3	0.27
ANKRD42	0.27
ITLN2	0.27
KLHL38	0.27
PRKCDBP	0.27
ZNF665	0.27
LPCAT1	0.27
TTYH3	0.27
SLCO5A1	0.27
NETO1	0.27
ELFN2	0.27
HERC5	0.27
ARID5B	0.27
UBE2J1	0.27
LINC00852	0.27
NFKBID	0.27
MEI1	0.27
SMIM3	0.27
ITPRIP	0.27
PIK3AP1	0.27
ZMIZ1-AS1	0.27
FXYD5	0.27
LINC00926	0.27
FAM46C	0.27
ZNF283	0.27
EPHA10	0.27
SAMD9L	0.27
PACS1	0.27
MAP7D1	0.27
LMBR1L	0.27
SAMD3	0.27
CAMTA2	0.27
SZT2	0.27
SAR1A	0.27
TCEAL7	0.27
NAV3	0.27
ERGIC1	0.27
METTL14	0.27
MXRA5	0.27
ACTG1P4	0.27
NATD1	0.27
ZNF330	0.27
SPCS3	0.27
LINC01366	0.27
TP53INP1	0.27
C6ORF222	0.27
TMOD2	0.27
[truncated: 18,436 more rows]

## Sheet: OV
PDGFRB	0.76
ROBO4	0.74
ESAM	0.73
APLNR	0.71
PCDH12	0.71
COL4A1	0.69
SH2D3C	0.69
CXORF36	0.69
GPR4	0.68
CD248	0.68
MRC2	0.67
LHFP	0.67
CD93	0.67
CLEC14A	0.67
FBN1	0.66
HIC1	0.66
ITGA5	0.66
ANGPTL2	0.66
AQP1	0.65
HLX	0.65
ADAMTS2	0.65
STARD8	0.65
SEMA6B	0.65
LZTS1	0.65
ARHGEF15	0.65
CDH5	0.64
MSC	0.64
RAMP3	0.64
PLVAP	0.64
PRDM8	0.64
PLXDC1	0.64
ARHGAP31	0.64
COL6A3	0.63
LOXL2	0.63
MMP14	0.63
TGFB1I1	0.63
DYSF	0.63
ARSI	0.63
SNAI2	0.62
CHSY3	0.62
EMILIN1	0.62
ACAN	0.61
COL3A1	0.61
COL4A2	0.61
COL5A2	0.61
F13A1	0.61
KDR	0.61
SERPINF1	0.61
PMP22	0.61
PRKG1	0.61
SPARC	0.61
ZEB1	0.61
ADAMTS4	0.61
C1QTNF6	0.61
ADGRF5	0.61
OLFML2B	0.61
AEBP1	0.6
AGTR1	0.6
COL1A1	0.6
COL6A2	0.6
PECAM1	0.6
PTGIR	0.6
FSTL1	0.6
SVEP1	0.6
MYCT1	0.6
COLEC12	0.6
ADAMTS12	0.6
CTHRC1	0.6
ECSCR	0.6
ANTXR2	0.6
ZCCHC24	0.6
SCARF2	0.6
HTRA3	0.6
ACTG2	0.59
VCAN	0.59
IGFBP4	0.59
IL3RA	0.59
LOX	0.59
MMP2	0.59
NID1	0.59
SPHK1	0.59
CLMP	0.59
COPZ2	0.59
CLEC1A	0.59
CCDC80	0.59
EBF2	0.59
COL5A1	0.58
DAB2	0.58
DCN	0.58
ELN	0.58
LRP1	0.58
LUM	0.58
NOTCH4	0.58
SEPT4	0.58
PLPP1	0.58
ADAM19	0.58
LDB2	0.58
MFRP	0.58
KCNE4	0.58
PODN	0.58
ELFN1	0.58
COL15A1	0.57
FAP	0.57
ZNF366	0.57
AOC3	0.57
ZEB2	0.57
ZNF385D	0.57
CREB3L1	0.57
CNRIP1	0.57
BMP1	0.56
CD36	0.56
COL1A2	0.56
ENG	0.56
HGF	0.56
ITGA1	0.56
CXCL12	0.56
THBS2	0.56
ADAM12	0.56
DCHS1	0.56
GFPT2	0.56
KIF26B	0.56
NID2	0.56
RCN3	0.56
CDH11	0.55
COL16A1	0.55
ECM2	0.55
FOLR2	0.55
TIE1	0.55
GALNT5	0.55
TMEM204	0.55
CYGB	0.55
GLT8D2	0.55
MRGPRF	0.55
EMCN	0.55
ACTA2	0.54
GRK5	0.54
PTPRB	0.54
SLC1A7	0.54
VWF	0.54
RECK	0.54
WISP1	0.54
P2RY14	0.54
POSTN	0.54
FAM124B	0.54
DACT3	0.54
DHH	0.54
DACT1	0.54
P4HA3	0.54
ASPN	0.54
SEPT11	0.54
SULF2	0.54
NEXN	0.54
CETP	0.53
COL11A1	0.53
ECM1	0.53
S1PR1	0.53
ETS1	0.53
GGT5	0.53
MAP1A	0.53
SFRP2	0.53
TGFBI	0.53
TIMP2	0.53
WIPF1	0.53
GPR68	0.53
GLIPR1	0.53
RAB31	0.53
BICC1	0.53
CERCAM	0.53
FAM198B	0.53
SMIM3	0.53
ITGA11	0.53
MSRB3	0.53
KANK3	0.53
ARSB	0.52
CSPG4	0.52
TAL1	0.52
SRPX	0.52
HEPH	0.52
MRVI1	0.52
CHPF	0.52
TTYH3	0.52
C1QTNF2	0.52
ALPK2	0.52
COL5A3	0.52
CRISPLD2	0.52
ZNF469	0.52
FAM167B	0.52
PLXND1	0.52
MEIS3	0.52
IFFO1	0.52
ADGRA2	0.52
AVPR1A	0.51
BGN	0.51
COL8A1	0.51
EDNRA	0.51
FN1	0.51
ISLR	0.51
PDGFRA	0.51
PLPPR4	0.51
KLF2	0.51
FILIP1L	0.51
MCTP1	0.51
MS4A4A	0.51
PTRF	0.51
SH3PXD2B	0.51
SPOCD1	0.51
ADGRL4	0.51
CALD1	0.5
EPAS1	0.5
MS4A2	0.5
FGF7	0.5
FLT1	0.5
LAMB1	0.5
LOXL1	0.5
SFRP4	0.5
TGFB1	0.5
THBS1	0.5
TIMP3	0.5
FZD1	0.5
FEZ1	0.5
PPM1F	0.5
ISM1	0.5
NUAK1	0.5
TMEM200A	0.5
SSC5D	0.5
VASH1	0.5
OLFML3	0.5
LMOD1	0.5
TMEM158	0.5
SRPX2	0.5
PDLIM3	0.5
ALDH1A3	0.49
ASPA	0.49
CACNA1C	0.49
COL6A1	0.49
UBE2QL1	0.49
PDGFRL	0.49
PLN	0.49
CLDN5	0.49
DOCK11	0.49
HAND2	0.49
GRAP	0.49
ADAMTS10	0.49
SH3RF3	0.49
NTM	0.49
MARVELD1	0.49
ANTXR1	0.49
FKBP14	0.49
PLAC9	0.49
HSPB7	0.49
CAMK2A	0.48
CDR1	0.48
CPA3	0.48
INHBA	0.48
NBL1	0.48
ROR2	0.48
TNFAIP6	0.48
FAM155A	0.48
KIAA0513	0.48
SPON2	0.48
PDPN	0.48
LILRB5	0.48
RPLP0P2	0.48
APOLD1	0.48
FNDC1	0.48
ABCA6	0.48
MXRA5	0.48
VGLL3	0.48
EHD2	0.48
ADH1B	0.47
AXL	0.47
DPT	0.47
FLI1	0.47
GPR21	0.47
IL2RA	0.47
MAF	0.47
NEDD4	0.47
PTGDR	0.47
RAB3IL1	0.47
TBXA2R	0.47
TEK	0.47
SPARCL1	0.47
RASSF2	0.47
TMEM119	0.47
RXFP3	0.47
OLFML1	0.47
GNG2	0.47
SLC9A9	0.47
LRRN4CL	0.47
BHLHE22	0.47
PDLIM2	0.47
MICAL1	0.47
CR1	0.46
CTSK	0.46
GEM	0.46
MMP19	0.46
RGS4	0.46
C10ORF128	0.46
SMPD1	0.46
STK10	0.46
TGFB3	0.46
SCARF1	0.46
SH2B3	0.46
ADAMTS7	0.46
SCRG1	0.46
PALLD	0.46
TICAM2	0.46
PCDHGA12	0.46
LATS2	0.46
NKX2-3	0.46
C5AR1	0.45
DRP2	0.45
GJB2	0.45
KCNMB1	0.45
MN1	0.45
MRC1	0.45
SNAI1	0.45
ZCCHC5	0.45
PPP1R18	0.45
SEMA7A	0.45
CNTNAP1	0.45
SH3PXD2A	0.45
SEC24D	0.45
MAFB	0.45
SMPDL3A	0.45
BEAN1	0.45
C1QTNF1	0.45
TMEM104	0.45
GALNT10	0.45
LRRC70	0.45
PCDHGC5	0.45
TANC2	0.45
KCNG2	0.45
PRDM6	0.45
CD209	0.45
XYLT1	0.45
GDF6	0.45
RAPH1	0.45
ADCY7	0.44
CD28	0.44
CCR4	0.44
CMKLR1	0.44
CNN1	0.44
EMP3	0.44
FBLN2	0.44
EFEMP1	0.44
FGF1	0.44
HSPG2	0.44
IL7R	0.44
IL16	0.44
NGFR	0.44
DDR2	0.44
PKD2	0.44
PLAU	0.44
MAPK11	0.44
MICAL2	0.44
ADAMTS14	0.44
CALCRL	0.44
DLC1	0.44
AKAP2	0.44
ARHGAP28	0.44
PODNL1	0.44
HIGD1B	0.44
SHANK3	0.44
TMEM255B	0.44
PAG1	0.44
SEMA3G	0.44
FRMD6	0.44
EXOC3L2	0.44
FAM26E	0.44
ZNF697	0.44
CMTM3	0.44
BCL6B	0.44
PLPPR2	0.44
LRRC15	0.43
BDKRB1	0.43
CSF2RB	0.43
C4ORF32	0.43
ERG	0.43
F2R	0.43
FABP4	0.43
GABRD	0.43
ITGA4	0.43
MMP11	0.43
PTGIS	0.43
RGS16	0.43
TLR4	0.43
TNNI2	0.43
RGS5	0.43
ARHGEF6	0.43
FSTL3	0.43
SEC23A	0.43
SLC35D3	0.43
KDELC1	0.43
ZFHX4	0.43
CCDC102B	0.43
FAM110D	0.43
CD300LG	0.43
C1QTNF3	0.43
CILP2	0.43
HMCN1	0.43
SLC12A8	0.43
MEDAG	0.43
GPR85	0.43
PCDH18	0.43
WIPI1	0.43
RASA3	0.43
ABLIM3	0.43
SULF1	0.43
GIMAP8	0.43
HEG1	0.43
PAMR1	0.43
ATP6V1B2	0.42
NKX3-2	0.42
SERPINH1	0.42
EPB42	0.42
ETV1	0.42
LAMA4	0.42
SERPINE1	0.42
PGF	0.42
PLAUR	0.42
PTGFR	0.42
SELE	0.42
MADCAM1	0.42
LOC401463	0.42
GAS7	0.42
ITGBL1	0.42
ABCA8	0.42
INMT	0.42
HSPA12B	0.42
LIMA1	0.42
EOGT	0.42
SYNE1	0.42
NAV3	0.42
TSHZ3	0.42
SNED1	0.42
FIBIN	0.42
PLPPR5	0.42
COL10A1	0.41
FCGR2A	0.41
IGFBP3	0.41
LTBP2	0.41
PDE3B	0.41
SGCA	0.41
TCF4	0.41
PXDN	0.41
HSD17B6	0.41
DOK2	0.41
PAPSS2	0.41
FHL5	0.41
CBLN4	0.41
TRAM2	0.41
PHYHIP	0.41
C1ORF54	0.41
C3ORF36	0.41
CD276	0.41
AKNA	0.41
KCTD10	0.41
RASL12	0.41
SIPA1L2	0.41
HIVEP3	0.41
GREM1	0.41
DSE	0.41
PIEZO2	0.41
C1S	0.4
ENTPD1	0.4
DNASE1L3	0.4
EBF1	0.4
FMO1	0.4
GPC1	0.4
LPAR4	0.4
HMOX1	0.4
ICAM2	0.4
CYR61	0.4
KIFC3	0.4
MATN3	0.4
NOS2	0.4
OMD	0.4
HTRA1	0.4
RASGRF2	0.4
CCL21	0.4
SLC6A1	0.4
TAGLN	0.4
TGFBR2	0.4
VCAM1	0.4
CH25H	0.4
DGKI	0.4
SLC16A7	0.4
CYP7B1	0.4
CXCL14	0.4
SLC36A1	0.4
RCAN2	0.4
RFX8	0.4
CLEC10A	0.4
CAPN11	0.4
FAM101A	0.4
GIMAP6	0.4
ELFN2	0.4
TRPV2	0.4
DCLK3	0.4
KIRREL	0.4
DRAM1	0.4
NWD2	0.4
PARM1	0.4
SEMA3D	0.4
TNN	0.4
SMOC2	0.4
P3H1	0.4
APOD	0.39
CFD	0.39
ENPEP	0.39
ACSL1	0.39
FAT1	0.39
ACKR1	0.39
GAS1	0.39
GNG11	0.39
HCK	0.39
HRH2	0.39
HTR2A	0.39
IL11	0.39
MGP	0.39
OGN	0.39
PLIN1	0.39
SCT	0.39
TIMP4	0.39
TNFRSF1B	0.39
TPM1	0.39
TNFSF4	0.39
VIM	0.39
CILP	0.39
PDE5A	0.39
ADIPOQ	0.39
SV2B	0.39
PLXNC1	0.39
KDELR3	0.39
GPR176	0.39
SLCO2B1	0.39
LILRA6	0.39
FAT4	0.39
RIN3	0.39
NRROS	0.39
CHST11	0.39
JAM3	0.39
TUBB6	0.39
SYTL2	0.39
MMRN1	0.39
ELL2	0.39
THSD1	0.39
EPB41L3	0.39
SYT8	0.39
TSPAN18	0.39
IGDCC4	0.39
C11ORF96	0.39
NEGR1	0.39
KLF17	0.39
TMEM236	0.39
ATP2A3	0.38
BDKRB2	0.38
KLF9	0.38
SLC31A2	0.38
FHL3	0.38
FPR3	0.38
GHR	0.38
IL4R	0.38
LAIR1	0.38
LIPE	0.38
MARCKS	0.38
MAP3K3	0.38
MYH1	0.38
MYLK	0.38
PCDHGC3	0.38
KLF14	0.38
PPEF1	0.38
PTGER3	0.38
MAPK12	0.38
ADAMTS16	0.38
CARMN	0.38
SLIT2	0.38
DOCK4	0.38
GJC1	0.38
CDC42EP2	0.38
P3H3	0.38
LYVE1	0.38
FAM65A	0.38
HAND2-AS1	0.38
PEAK1	0.38
FAM214B	0.38
PLEKHO2	0.38
AQP7P1	0.38
C1QTNF7	0.38
ARHGAP24	0.38
NFAM1	0.38
MIR22HG	0.38
LGALS12	0.38
CSGALNACT2	0.38
STAB2	0.38
TCEAL7	0.38
ADAMTSL1	0.38
SHE	0.38
SMOC1	0.38
ACACB	0.37
PRDM1	0.37
CDR2	0.37
COL12A1	0.37
MEGF8	0.37
STOM	0.37
GPD1	0.37
HTR7	0.37
IGFBP5	0.37
MAN1A1	0.37
MCAM	0.37
NOVA2	0.37
PLXNA1	0.37
POU2F2	0.37
PRKD1	0.37
PTPRE	0.37
SMTN	0.37
SLIT3	0.37
SSTR2	0.37
PXDNL	0.37
PSTPIP1	0.37
MAP4K4	0.37
BCAR1	0.37
CD302	0.37
CCL26	0.37
KCTD17	0.37
SFXN3	0.37
TWIST2	0.37
RIMBP3	0.37
NKD2	0.37
SLED1	0.37
DLL4	0.37
LGI2	0.37
FLVCR2	0.37
UNC5B	0.37
C3ORF70	0.37
MPEG1	0.37
TEX29	0.37
PIK3R5	0.37
FAM78A	0.37
TUSC5	0.37
SLC39A13	0.37
RASGRP3	0.37
RCSD1	0.37
GIPC3	0.37
ANGPT1	0.36
FMNL1	0.36
CIDEA	0.36
CNN2	0.36
COL8A2	0.36
DIO2	0.36
EVI2A	0.36
FGF14	0.36
GPR1	0.36
HAS2	0.36
ID3	0.36
IL6	0.36
KCNJ15	0.36
MEST	0.36
MYH11	0.36
RANBP3L	0.36
PRPH2	0.36
CCL16	0.36
SDC2	0.36
FSCN1	0.36
GIMAP1	0.36
CST7	0.36
GAB3	0.36
SEMA5A	0.36
CD163	0.36
GMFG	0.36
EDIL3	0.36
BASP1	0.36
MAB21L2	0.36
IL24	0.36
ZC3H12D	0.36
C19ORF35	0.36
PEAR1	0.36
MRO	0.36
SYDE1	0.36
GIMAP5	0.36
CYP26B1	0.36
FAM225A	0.36
ENTPD7	0.36
STARD13	0.36
MS4A7	0.36
DEPDC7	0.36
HEYL	0.36
CYTH4	0.36
SULT1B1	0.36
TNFAIP8L3	0.36
SOX8	0.36
EHD4	0.36
MS4A6A	0.36
ACTN1	0.35
ADORA2A	0.35
AQP7	0.35
C3AR1	0.35
CALU	0.35
CBFA2T3	0.35
CD68	0.35
CRHBP	0.35
CYP1B1	0.35
DES	0.35
CYB5R3	0.35
DOCK2	0.35
RCAN1	0.35
EN1	0.35
GRIA3	0.35
GRP	0.35
NDST1	0.35
LSAMP	0.35
LYL1	0.35
MAFG	0.35
MEFV	0.35
MMP16	0.35
MYO1B	0.35
NAGLU	0.35
PDGFB	0.35
PLEK	0.35
PLS3	0.35
RGS2	0.35
BEST1	0.35
PLIN4	0.35
CCRL2	0.35
IL1RL1	0.35
ITM2A	0.35
MUC12	0.35
VSIG4	0.35
ZNF668	0.35
TMEM106A	0.35
NPL	0.35
NLRP3	0.35
RASSF4	0.35
CHST15	0.35
HEPN1	0.35
FAM109B	0.35
FAM225B	0.35
TMEM150B	0.35
ENOX1	0.35
TCP11L1	0.35
SEPT8	0.35
FBXL7	0.35
TMEFF2	0.35
ATP8B2	0.35
PHLDB2	0.35
ISX	0.35
NLRP12	0.35
PCOLCE2	0.35
AFAP1	0.35
SCHIP1	0.35
EFEMP2	0.35
ADRB2	0.34
C1R	0.34
CDX1	0.34
COX7A1	0.34
CTGF	0.34
FGF5	0.34
FOXO1	0.34
FPR1	0.34
PRICKLE2	0.34
FFAR3	0.34
HAS1	0.34
HBB	0.34
HTR2B	0.34
TNC	0.34
IL10	0.34
LEP	0.34
GIMAP7	0.34
PCOLCE	0.34
ENPP2	0.34
PF4	0.34
PPBP	0.34
PPP3CC	0.34
CCL14	0.34
ST8SIA1	0.34
SLA	0.34
SLC20A1	0.34
STX11	0.34
S1PR4	0.34
LIN7A	0.34
CD84	0.34
CYTH3	0.34
CYTH1	0.34
SORBS3	0.34
LILRB2	0.34
PROCR	0.34
SORBS1	0.34
P3H4	0.34
VAMP5	0.34
SUGCT	0.34
C14ORF37	0.34
VGLL2	0.34
OSBPL5	0.34
FKBP7	0.34
PPP1R9B	0.34
B3GNT9	0.34
SH3D19	0.34
LINC00922	0.34
FBLIM1	0.34
JAML	0.34
SIRPB2	0.34
DIP2C	0.34
SAMD3	0.34
PMEPA1	0.34
WDFY4	0.34
SUN2	0.34
PDE7B	0.34
FAM180A	0.34
DPEP2	0.34
FBLN7	0.34
CHST8	0.34
TPSB2	0.34
FAM101B	0.34
CD14	0.33
CD34	0.33
CDH13	0.33
CDKN1A	0.33
HBEGF	0.33
XIRP1	0.33
GNA12	0.33
GYPE	0.33
IL10RA	0.33
ITGB2	0.33
MGAT5	0.33
MYO1F	0.33
NCF4	0.33
NGF	0.33
PDE2A	0.33
PRRX1	0.33
SDC1	0.33
SHOX2	0.33
SLC6A7	0.33
TFPI	0.33
SCG2	0.33
PDLIM7	0.33
GLP2R	0.33
GNA14	0.33
TRIL	0.33
CLEC2B	0.33
GPC6	0.33
LHFPL2	0.33
RAMP2	0.33
CORIN	0.33
FERMT2	0.33
LILRB3	0.33
RAPGEF4	0.33
DNAJB4	0.33
FKRP	0.33
LACC1	0.33
RUNX1-IT1	0.33
PDCD1LG2	0.33
PIK3R6	0.33
FERMT3	0.33
MEGF10	0.33
COX4I2	0.33
EXOC3L1	0.33
BATF3	0.33
DOCK10	0.33
STAB1	0.33
KIAA0922	0.33
LY96	0.33
KCNK12	0.33
URAD	0.33
SORCS2	0.33
MKL1	0.33
VAT1L	0.33
MARK4	0.33
AK5	0.33
FKBP10	0.33
ARHGAP18	0.33
FAM212A	0.33
POM121L9P	0.33
SYNE3	0.33
MYO1G	0.33
ADGRB1	0.32
COL6A6	0.32
CD4	0.32
CCR7	0.32
GPR183	0.32
FER	0.32
FLNC	0.32
FOSL2	0.32
GLI3	0.32
GLRX	0.32
GYPC	0.32
HTR1B	0.32
HTR4	0.32
KCNJ8	0.32
MFAP4	0.32
MME	0.32
NPAS4	0.32
NCAM2	0.32
PER1	0.32
LGMN	0.32
PTPRC	0.32
SBF1	0.32
SHC1	0.32
C14ORF180	0.32
TNFSF12	0.32
RAPGEF2	0.32
SEC24A	0.32
AKAP13	0.32
WHAMMP3	0.32
FAM109A	0.32
GAL3ST4	0.32
TXNDC15	0.32
MIAT	0.32
SETD7	0.32
MARCH3	0.32
SLC10A6	0.32
ANGPTL4	0.32
TLR8	0.32
FAM126A	0.32
CORO6	0.32
TM6SF2	0.32
C11ORF24	0.32
PRR34	0.32
LINC01142	0.32
CHSY1	0.32
SLITRK3	0.32
PARVA	0.32
PCDHGA5	0.32
GPRIN3	0.32
DOK6	0.32
HCG22	0.32
SLAMF8	0.32
SHD	0.32
DOCK6	0.32
KIAA1614	0.32
KANK2	0.32
KIF26A	0.32
CLEC12B	0.32
RTL1	0.32
LOC389332	0.32
C5ORF46	0.32
TMEM176B	0.32
ADGRE2	0.32
ITPRIPL2	0.32
GREM2	0.32
HHIP	0.32
SUSD1	0.32
RASAL3	0.32
ABCD2	0.31
RUNX1	0.31
TNFRSF8	0.31
CD33	0.31
CHRNA3	0.31
CLIC2	0.31
CCR1	0.31
CTSZ	0.31
ELK3	0.31
EVC	0.31
FCGR3A	0.31
GPX8	0.31
GALNS	0.31
IGFBP7	0.31
IL9R	0.31
LGALS1	0.31
MGAT1	0.31
CD99	0.31
MMP3	0.31
PPP1R12B	0.31
OLR1	0.31
ENPP1	0.31
PTGFRN	0.31
RCVRN	0.31
RGS3	0.31
SCN1B	0.31
CCL11	0.31
SELP	0.31
SLC22A3	0.31
TPSAB1	0.31
VDR	0.31
CLTCL1	0.31
DGKD	0.31
BAG3	0.31
ARPP21	0.31
ARID5A	0.31
KERA	0.31
SPRN	0.31
CORO7	0.31
PRKCDBP	0.31
LIMD2	0.31
PGM5-AS1	0.31
PLAC8	0.31
RAB8B	0.31
KBTBD8	0.31
RIMBP3C	0.31
SATB2-AS1	0.31
PALM2-AKAP2	0.31
WNT4	0.31
LINC00304	0.31
METRNL	0.31
P3H2	0.31
BARX1	0.31
KLHL4	0.31
FAM189A1	0.31
HEPACAM	0.31
MAP3K7CL	0.31
LXN	0.31
FAM19A5	0.31
TPSG1	0.31
CCDC69	0.31
CD300LB	0.31
RGS17	0.31
NALCN	0.31
RGS18	0.31
ABCA1	0.3
ABR	0.3
ACTB	0.3
ADRA1D	0.3
AP2A1	0.3
ART4	0.3
CA1	0.3
CD37	0.3
CPN2	0.3
CTSG	0.3
ARID3A	0.3
ELANE	0.3
EXTL1	0.3
FLNA	0.3
DZIP1L	0.3
GNA15	0.3
HCLS1	0.3
NCKAP1L	0.3
HK3	0.3
INPP5A	0.3
ITGB5	0.3
KCNA1	0.3
KCNJ6	0.3
LCP2	0.3
MEF2C	0.3
MEP1A	0.3
MDGA1	0.3
GADD45B	0.3
NFATC2	0.3
TMEM154	0.3
CFP	0.3
PIK3CG	0.3
PLA2G2A	0.3
SRGN	0.3
PRKCB	0.3
CCL4	0.3
CCL18	0.3
CX3CL1	0.3
SGCD	0.3
SIGLEC1	0.3
SPN	0.3
TBX1	0.3
TLL1	0.3
TSPAN4	0.3
VASP	0.3
VIP	0.3
LAPTM5	0.3
ITGA8	0.3
IL18RAP	0.3
GRAP2	0.3
GOSR2	0.3
FAM131B	0.3
CTIF	0.3
TOM1	0.3
GPA33	0.3
PLIN3	0.3
LRRC17	0.3
CD300C	0.3
ABHD2	0.3
CLEC4G	0.3
NHSL2	0.3
DDIT4L	0.3
C8ORF58	0.3
RAB3C	0.3
IL21R	0.3
IGF2-AS	0.3
PIK3AP1	0.3
CCL15-CCL14	0.3
C10ORF55	0.3
GPR88	0.3
SASH3	0.3
LINC00482	0.3
MS4A12	0.3
GIMAP4	0.3
TENM3	0.3
KIF21B	0.3
MPRIP	0.3
PHLDB1	0.3
OR10G8	0.3
C5ORF64	0.3
LOC285696	0.3
PADI4	0.3
ANKRD50	0.3
SHROOM4	0.3
IL33	0.3
ACSM2A	0.3
LILRA5	0.3
ANKRD44	0.3
SLC29A4	0.3
DKK2	0.3
SPINK4	0.3
LRRC25	0.3
LIX1L	0.3
ZMAT3	0.3
ISL2	0.3
LGI4	0.3
OSR1	0.3
AIF1	0.29
APBB2	0.29
RHOH	0.29
LCTL	0.29
BCHE	0.29
CA2	0.29
CALB2	0.29
CAMK2D	0.29
CASP5	0.29
CD53	0.29
CEACAM5	0.29
CLCA1	0.29
CSF1R	0.29
CYP26A1	0.29
DAPK3	0.29
SLC26A3	0.29
DUSP5	0.29
DUSP7	0.29
EGR3	0.29
FABP1	0.29
FBLN1	0.29
FCGR1A	0.29
MCHR1	0.29
GUCA2A	0.29
ITGAM	0.29
MEF2D	0.29
MPP1	0.29
CCDC71L	0.29
MYH9	0.29
NAGA	0.29
NOTCH1	0.29
NTRK2	0.29
NUCB1	0.29
PBX3	0.29
PPARG	0.29
PTPRD	0.29
REG1B	0.29
S100A12	0.29
CCL19	0.29
SEMA3F	0.29
SLC18A1	0.29
SPIB	0.29
NACC2	0.29
CLEC3B	0.29
COL14A1	0.29
WAS	0.29
CLIP2	0.29
PLA2G4C	0.29
MARCO	0.29
NRP1	0.29
CYTIP	0.29
RUSC2	0.29
GLYAT	0.29
CPQ	0.29
SEMA3C	0.29
NXPH3	0.29
ARMC9	0.29
CXORF21	0.29
TRIM67	0.29
CD300E	0.29
CHST14	0.29
SSTR5-AS1	0.29
AQP7P3	0.29
CD300LF	0.29
MIR4435-2HG	0.29
TM4SF18	0.29
PI15	0.29
AGAP2	0.29
HOPX	0.29
FBXL22	0.29
KRT20	0.29
CHPF2	0.29
RNF186	0.29
TMEM132A	0.29
PHGR1	0.29
FEZF2	0.29
CHST12	0.29
CLCA4	0.29
FRG2	0.29
ADAP2	0.29
HIC2	0.29
APOBR	0.29
PCDHGB1	0.29
MRAP	0.29
DCBLD1	0.29
PRND	0.29
PLA2G15	0.29
IL17RA	0.29
EIF5A2	0.29
LYPD8	0.29
FAM20C	0.29
ACKR3	0.29
ULK4P3	0.29
BAHCC1	0.29
HYALP1	0.29
RBMS3	0.29
ARHGAP30	0.29
LRRC4B	0.29
OBP2B	0.29
SPRED1	0.29
ZG16	0.29
FAM160B2	0.29
CREB3L2	0.29
LMF1	0.29
PLBD2	0.29
A2M	0.28
ALDOB	0.28
ANXA6	0.28
ARHGDIB	0.28
ASGR2	0.28
C1QA	0.28
CDX2	0.28
CEACAM7	0.28
CTSO	0.28
EPYC	0.28
TYMP	0.28
EGR2	0.28
EPHB3	0.28
ERN1	0.28
F2RL2	0.28
FCER2	0.28
FCGRT	0.28
FRZB	0.28
FYB	0.28
GAA	0.28
GJA1	0.28
GZMM	0.28
HOXA1	0.28
IGF1	0.28
IGFBP6	0.28
IL2RB	0.28
IL7	0.28
INSRR	0.28
MSR1	0.28
MYH8	0.28
NNMT	0.28
NPTX1	0.28
NR4A2	0.28
OXT	0.28
PC	0.28
PLA2G5	0.28
PTHLH	0.28
PVR	0.28
SLC12A4	0.28
SPI1	0.28
TBXAS1	0.28
THPO	0.28
TNS1	0.28
TPM2	0.28
PTCRA	0.28
NR4A3	0.28
TPST1	0.28
CDK5R1	0.28
IER3	0.28
CACNA1G	0.28
SOCS3	0.28
SLC7A7	0.28
NCOR2	0.28
PIEZO1	0.28
SIRPA	0.28
HS3ST3B1	0.28
IKZF1	0.28
ABCA9	0.28
TSPAN9	0.28
FGL2	0.28
LILRA3	0.28
IRAK3	0.28
LINGO4	0.28
ERVFRD-1	0.28
DOCK8	0.28
OR2J3	0.28
CLEC4A	0.28
METTL11B	0.28
TLR7	0.28
ASB1	0.28
HHIPL1	0.28
NKX6-2	0.28
CD244	0.28
HAVCR2	0.28
UGT1A10	0.28
TMEM235	0.28
ZFHX4-AS1	0.28
TMEM105	0.28
NXPE4	0.28
NXPE1	0.28
TMEM26	0.28
CSGALNACT1	0.28
KIAA0930	0.28
SATB2	0.28
SYNM	0.28
RNF175	0.28
C8ORF31	0.28
SCARA5	0.28
NAV1	0.28
P2RY8	0.28
JPH2	0.28
ADAMTSL3	0.28
SLC39A12	0.28
PREX1	0.28
FNIP2	0.28
IGFN1	0.28
CBARP	0.28
NLRC4	0.28
GPR139	0.28
ZNF804A	0.28
TIMD4	0.28
GNB4	0.28
FAM114A1	0.28
SIGLEC9	0.28
HES5	0.28
DLL1	0.28
FHOD1	0.28
LRP12	0.28
ARL5C	0.28
KCNIP2	0.28
CIDEC	0.28
SAMSN1	0.28
ARHGAP9	0.28
MMP25	0.28
RAB37	0.28
ABL1	0.27
ABL2	0.27
ACP2	0.27
FAS	0.27
RHOB	0.27
DST	0.27
BTK	0.27
CAV1	0.27
CD86	0.27
CHRNA1	0.27
CMA1	0.27
KLF6	0.27
CYBB	0.27
PARP15	0.27
DUSP1	0.27
DUSP3	0.27
ERCC2	0.27
EVI2B	0.27
GALNT2	0.27
GLS	0.27
GPR34	0.27
GTF3C1	0.27
GZMK	0.27
NR4A1	0.27
HOXA3	0.27
ITGAL	0.27
ITK	0.27
LGALS4	0.27
LIF	0.27
MAN2A1	0.27
MSN	0.27
MTNR1A	0.27
MYO1E	0.27
NCF2	0.27
NFATC1	0.27
NTRK1	0.27
OPRD1	0.27
PDE1C	0.27
PLOD1	0.27
PPIC	0.27
RARRES2	0.27
CCL22	0.27
CCL23	0.27
SELL	0.27
ST3GAL2	0.27
SIPA1	0.27
SSTR5	0.27
CDKL5	0.27
NRK	0.27
TBX5	0.27
THBD	0.27
TLR2	0.27
TRAF1	0.27
CASC15	0.27
ZNF705D	0.27
CPZ	0.27
BHLHE40	0.27
UNC5C	0.27
MYH13	0.27
FGF16	0.27
WISP2	0.27
PGLYRP1	0.27
TNFSF13B	0.27
PLK2	0.27
LILRB1	0.27
LILRB4	0.27
ADAMTS5	0.27
ZMAT4	0.27
RERGL	0.27
ATP8B4	0.27
DOK3	0.27
SPSB1	0.27
PDGFD	0.27
CMIP	0.27
GRIP2	0.27
G0S2	0.27
KATNAL1	0.27
WNT16	0.27
MRGPRX3	0.27
MEGF11	0.27
NTNG2	0.27
ITPRIP	0.27
MXRA8	0.27
FAM63B	0.27
FAM20A	0.27
LINC00483	0.27
SUPT20HL1	0.27
PHLDA1	0.27
ARHGAP15	0.27
PSD3	0.27
LILRA4	0.27
TMEM2	0.27
ASPHD2	0.27
STON1-GTF2A1L	0.27
PI16	0.27
KIAA1549L	0.27
CDYL2	0.27
SNX20	0.27
COL24A1	0.27
OR12D2	0.27
NOX1	0.27
DKK3	0.27
PCED1B-AS1	0.27
SHISA2	0.27
TMIGD1	0.27
FOXN3-AS2	0.27
CLEC12A	0.27
TMEM8C	0.27
SNX8	0.27
KANK4	0.27
ADCY9	0.26
ALDH1B1	0.26
AMPD3	0.26
CD200R1	0.26
LRRN4	0.26
BHMT	0.26
BMP4	0.26
POLR3D	0.26
C1QB	0.26
C1QC	0.26
CDH17	0.26
CEACAM4	0.26
CNN3	0.26
CST6	0.26
DPYSL3	0.26
EMP1	0.26
FOSB	0.26
GUCY1A3	0.26
HIST1H1A	0.26
TNFRSF9	0.26
IL17A	0.26
INPP5D	0.26
ITGAX	0.26
LPL	0.26
LY9	0.26
CD180	0.26
TRIM40	0.26
SAMD14	0.26
PDK4	0.26
PIM1	0.26
PITX2	0.26
PPP2R5B	0.26
PRKAR1A	0.26
RAB3B	0.26
RAC2	0.26
SCN3A	0.26
CCL3	0.26
CCL15	0.26
SGK1	0.26
TACR3	0.26
ZNF70	0.26
SIGLEC5	0.26
DLK1	0.26
APLN	0.26
FCGR2C	0.26
KLF4	0.26
RAB9BP1	0.26
ENTPD4	0.26
HS3ST2	0.26
IGSF6	0.26
MLLT11	0.26
CKAP4	0.26
CD300A	0.26
SPATA31B1P	0.26
C17ORF62	0.26
ZBED6CL	0.26
OSR2	0.26
DUOX2	0.26
CCM2	0.26
FOXP3	0.26
BIN2	0.26
EVL	0.26
CATSPER1	0.26
MOGAT3	0.26
TAGAP	0.26
LINC00479	0.26
NT5C1A	0.26
GLIS2	0.26
PLPP7	0.26
SLC25A45	0.26
CDHR5	0.26
LINC00112	0.26
OR4X2	0.26
APBB1IP	0.26
KLB	0.26
MAGEL2	0.26
UGT1A8	0.26
TBC1D8B	0.26
MARCH1	0.26
ZHX3	0.26
IKBIP	0.26
JMJD6	0.26
SLC37A2	0.26
LRRC8A	0.26
CORO1C	0.26
OAF	0.26
OTOR	0.26
KLHL6	0.26
ATP10D	0.26
C20ORF166-AS1	0.26
STAMBPL1	0.26
VPS18	0.26
FCGR1C	0.26
NOCT	0.26
TMEM184B	0.26
MYADM	0.26
SLC38A10	0.26
TBC1D16	0.26
LINC00475	0.26
CCL4L1	0.26
OSTM1	0.26
DBNL	0.26
GMPPA	0.26
MDFIC	0.26
TMBIM1	0.26
MLKL	0.25
BMX	0.25
RUNX2	0.25
RUNX1T1	0.25
CD247	0.25
CEBPE	0.25
CRYBB1	0.25
CSN2	0.25
DAO	0.25
DUSP2	0.25
MEGF6	0.25
FCGR1B	0.25
GP9	0.25
GRIA1	0.25
GRIN2B	0.25
HBA1	0.25
HOXA5	0.25
IL12RB1	0.25
LCP1	0.25
LMO2	0.25
LSP1	0.25
MNDA	0.25
PAX5	0.25
PCSK5	0.25
SERPINF2	0.25
PLXNA2	0.25
PRKACB	0.25
PTGER4	0.25
SCN4A	0.25
SPOCK1	0.25
SPTA1	0.25
ADAMTS15	0.25
TNNT3	0.25
ZAP70	0.25
TPST2	0.25
KCNAB2	0.25
HERC2	0.25
DCLK1	0.25
KL	0.25
ACAP1	0.25
RASGRP2	0.25
OLFM1	0.25
NES	0.25
SYNPO	0.25
KIAA0226L	0.25
OPA3	0.25
ORAI2	0.25
TMC8	0.25
PTCHD4	0.25
NETO1	0.25
IGFL2	0.25
DIRC1	0.25
FAM196A	0.25
BTBD16	0.25
CD163L1	0.25
SNORA1	0.25
TMEM176A	0.25
KLRK1	0.25
HMGXB3	0.25
SAMD4A	0.25
RHOBTB2	0.25
ARC	0.25
PCDHGB8P	0.25
RBFOX2	0.25
PPP1R15A	0.25
FABP12	0.25
RIC1	0.25
SFMBT2	0.25
PRODH2	0.25
POM121L1P	0.25
SCUBE3	0.25
HSF5	0.25
WDR81	0.25
SIGLEC7	0.25
DENND2A	0.25
SEC61A1	0.25
DIO3OS	0.25
CLEC7A	0.25
FNDC3B	0.25
AP1B1	0.24
ANXA2	0.24
ARRB1	0.24
FAM43A	0.24
BMP2	0.24
CD5	0.24
CD80	0.24
CD48	0.24
CD79B	0.24
CHAD	0.24
CCR5	0.24
HAPLN1	0.24
CSF2RA	0.24
CTSL	0.24
CTSS	0.24
DNM1	0.24
EPHB2	0.24
STX2	0.24
CLN8	0.24
FIGF	0.24
FOXF1	0.24
HBA2	0.24
HOXD10	0.24
HOXD11	0.24
HTN3	0.24
IRF8	0.24
KCNA5	0.24
LNPEP	0.24
SH2D1A	0.24
NEUROD1	0.24
BMPER	0.24
PKD1	0.24
DNAJC3	0.24
PSAP	0.24
OLFML2A	0.24
PTPRG	0.24
S100B	0.24
SRF	0.24
TDO2	0.24
TLN1	0.24
TWIST1	0.24
VEGFC	0.24
LUZP1	0.24
FOSL1	0.24
CEACAM18	0.24
ARHGEF1	0.24
MUC17	0.24
SNCAIP	0.24
CEP170	0.24
OLIG2	0.24
PDLIM5	0.24
TMC6	0.24
TREML3P	0.24
TMEM86A	0.24
FBXO31	0.24
RAB15	0.24
SGPP1	0.24
LBH	0.24
GALNT9	0.24
PLEKHO1	0.24
ABI3	0.24
SLC22A17	0.24
MEX3B	0.24
LRRC8C	0.24
HVCN1	0.24
LIPI	0.24
PARD6G	0.24
S1PR5	0.24
CPXM2	0.24
ERRFI1	0.24
SSH1	0.24
MIER2	0.24
ZNF853	0.24
HEMGN	0.24
SBNO2	0.24
LIMS2	0.24
WWC3	0.24
TBC1D2B	0.24
COTL1	0.24
TREML4	0.24
ATP10A	0.24
ARHGAP23	0.24
FAM99B	0.24
TP53INP2	0.24
LMF2	0.24
MPP4	0.24
DGCR11	0.24
HS3ST5	0.24
LRRTM2	0.24
PTPN22	0.24
NPNT	0.24
TMEM132E	0.24
COL6A5	0.24
FOXP1	0.24
P2RY10	0.24
AWAT2	0.24
AATK-AS1	0.24
GRASP	0.24
SERTAD1	0.24
PABPN1L	0.24
MIR1-1HG	0.24
POPDC2	0.24
MFSD1	0.24
CDK15	0.24
ADH1A	0.23
ALAS2	0.23
ANXA5	0.23
APC	0.23
CXCR5	0.23
NLRC3	0.23
FOXN3	0.23
CLPTM1	0.23
CYP8B1	0.23
DFNA5	0.23
LPAR1	0.23
ETS2	0.23
FCN1	0.23
FGR	0.23
FLT3LG	0.23
FPR2	0.23
GNGT2	0.23
GPX2	0.23
GRB10	0.23
HSD17B2	0.23
STARD4	0.23
IMPA1	0.23
INPP1	0.23
KCNK3	0.23
KLRB1	0.23
LCK	0.23
MBL2	0.23
MMP1	0.23
CLDN11	0.23
PITX3	0.23
PLEC	0.23
PRF1	0.23
RGS1	0.23
RXRA	0.23
SCD	0.23
SELPLG	0.23
SH3GL1	0.23
SVIL	0.23
NR2F1	0.23
KLF10	0.23
TLE4	0.23
TNFAIP3	0.23
PLA2G7	0.23
SLITRK4	0.23
EOMES	0.23
FZD8	0.23
KMO	0.23
KLF7	0.23
HYAL2	0.23
SKAP2	0.23
SPAG9	0.23
CCPG1	0.23
RNF113B	0.23
NTN1	0.23
HOMER3	0.23
TBKBP1	0.23
SUSD6	0.23
TESPA1	0.23
MED13	0.23
CD96	0.23
SEPT9	0.23
PPP1R17	0.23
LINC00705	0.23
SAMD8	0.23
LOC340074	0.23
DUOXA2	0.23
TMEM109	0.23
CRELD2	0.23
TNFAIP8L2	0.23
ARSJ	0.23
FAM89A	0.23
TRAF3IP3	0.23
APOL5	0.23
CCBE1	0.23
GBP5	0.23
SH3GLB1	0.23
SPATA9	0.23
KRTAP1-5	0.23
ANGPT4	0.23
SLA2	0.23
ACAP3	0.23
SGIP1	0.23
RASD1	0.23
MRGPRX4	0.23
SIK1	0.23
SLC45A3	0.23
KIAA1755	0.23
GPBAR1	0.23
UG0898H09	0.23
OR4B1	0.23
EPDR1	0.23
DEF8	0.23
SMIM21	0.23
TMEM45A	0.23
ZNF532	0.23
TMEM52B	0.23
ASIC4	0.23
TFEC	0.23
LRCH1	0.23
PCDHGC4	0.23
TNS2	0.23
PIP5K1C	0.23
SLC24A3	0.23
DNAJB5	0.23
KCTD20	0.23
SLFN11	0.23
KRTAP10-7	0.23
SPSB4	0.23
NBEA	0.23
C10ORF113	0.23
GVINP1	0.23
HEATR9	0.23
MDS2	0.23
TBX21	0.23
ZNF831	0.23
BRE-AS1	0.23
LGALS9C	0.23
CCDC136	0.23
ADARB1	0.22
ANXA2P2	0.22
APOE	0.22
PHOX2A	0.22
CD44	0.22
FCER1A	0.22
FGF2	0.22
FOXE1	0.22
FUT7	0.22
GPR3	0.22
GUCY2D	0.22
HOXA6	0.22
IGF2R	0.22
IL2RG	0.22
ITGB1	0.22
KIF25	0.22
LAIR2	0.22
LYZ	0.22
MEOX2	0.22
MPP2	0.22
NHLH2	0.22
P2RY1	0.22
ABCB4	0.22
PLCG1	0.22
STAT4	0.22
TFE3	0.22
TGFBR1	0.22
TNNI1	0.22
TNXB	0.22
PI4KAP1	0.22
WNT3	0.22
HIST1H2AL	0.22
HIST1H3C	0.22
FIGNL2	0.22
CHRD	0.22
ADAM23	0.22
IL18R1	0.22
ARHGEF7	0.22
PLOD3	0.22
TNFSF18	0.22
TGM5	0.22
HAND1	0.22
IGDCC3	0.22
SMCR5	0.22
KIAA0408	0.22
RHOBTB1	0.22
ADAMTSL5	0.22
OR51E1	0.22
CHMP6	0.22
TTBK2	0.22
SPATC1	0.22
GSG1L	0.22
FRG2B	0.22
CNPY4	0.22
PSMG3-AS1	0.22
NEUROG3	0.22
MAS1L	0.22
SYT15	0.22
GALNT15	0.22
CREB3L3	0.22
MGC12916	0.22
RBPMS2	0.22
RTN4RL2	0.22
SNRK	0.22
VPS37C	0.22
PIK3CD-AS1	0.22
RNF145	0.22
PDZRN3	0.22
GRAMD4	0.22
TMEM14EP	0.22
PCDHGA2	0.22
DLEU7	0.22
HMHA1	0.22
MMD	0.22
FAM106CP	0.22
EHBP1L1	0.22
HECW2	0.22
NEUROD4	0.22
VSTM2A	0.22
LCE3A	0.22
TAC4	0.22
DERL3	0.22
CLIC4	0.22
SUSD5	0.22
KRTAP12-4	0.22
FBXO10	0.22
INAFM1	0.22
MTSS1L	0.22
SLC43A2	0.22
THEMIS	0.22
ADAMDEC1	0.22
MAMDC2	0.22
SCIMP	0.22
PLSCR5	0.22
REM1	0.22
POM121L8P	0.22
ZDHHC8	0.22
TAS2R30	0.22
BCAN	0.22
RHBDF1	0.22
CSRNP1	0.22
FNDC4	0.22
ACVR1	0.21
ALOX5	0.21
ADCY4	0.21
ARSF	0.21
APCDD1L	0.21
CD2	0.21
CD7	0.21
CNR2	0.21
NKX2-5	0.21
CTLA4	0.21
TSC22D3	0.21
EPHA2	0.21
FCAR	0.21
FCER1G	0.21
FLT4	0.21
FOS	0.21
PRRC1	0.21
GFI1	0.21
GUCY2C	0.21
INS-IGF2	0.21
HEXB	0.21
HNMT	0.21
HOXA2	0.21
HOXC13	0.21
HOXD13	0.21
HSPA6	0.21
ITGAV	0.21
LASP1	0.21
LMNA	0.21
MCC	0.21
MFAP2	0.21
MITF	0.21
MMP9	0.21
OSM	0.21
COL26A1	0.21
PFKFB1	0.21
PIP4K2A	0.21
PLCG2	0.21
PSKH1	0.21
RAB5C	0.21
HTRA4	0.21
ADAMTS18	0.21
TBX15	0.21
TCN2	0.21
TNFAIP1	0.21
VTN	0.21
LOC400940	0.21
LST1	0.21
SDPR	0.21
FCMR	0.21
ABCG1	0.21
MTSS1	0.21
GIT2	0.21
PJA2	0.21
CLEC3A	0.21
ANGPTL7	0.21
SIRPB1	0.21
[truncated: 18,436 more rows]

[truncated: 5 more sheets: PAAD, PRAD, SKCM, UCEC, Intersection]
